1           **Arf GTPase activates the WAVE Regulatory Complex**  
2                                           **through a novel binding site**

3  
4   Sheng Yang<sup>1</sup>, Yijun Liu<sup>1</sup>, Abbigale Brown<sup>1</sup>, Matthias Schaks<sup>2,3,4</sup>, Bojian Ding<sup>5</sup>, Daniel A.  
5   Kramer<sup>1</sup>, Li Ding<sup>6</sup>, Olga Alekhina<sup>6</sup>, Daniel D. Billadeau<sup>6</sup>, Saikat Chowdhury<sup>5,7,8</sup>, Junmei  
6   Wang<sup>9</sup>, Klemens Rottner<sup>2,3,10</sup>, Baoyu Chen<sup>1\*</sup>

7  
8   **Affiliations:**

9   <sup>1</sup>Roy J. Carver Department of Biochemistry, Biophysics & Molecular Biology, Iowa State  
10   University, 2437 Pammel Drive, Ames, IA 50011, USA.

11   <sup>2</sup>Division of Molecular Cell Biology, Zoological Institute, Technische Universität  
12   Braunschweig, Spielmannstrasse 7, 38106 Braunschweig, Germany.

13   <sup>3</sup>Department of Cell Biology, Helmholtz Centre for Infection Research, Inhoffenstrasse 7,  
14   38124 Braunschweig, Germany.

15   <sup>4</sup>Present address: Soilytix GmbH, Dammtorwall 7A, 20354 Hamburg, Germany

16   <sup>5</sup>Department of Biochemistry and Cell Biology, Stony Brook University, 100 Nicolls Road,  
17   Stony Brook, NY 11794, USA.

18   <sup>6</sup>Division of Oncology Research, College of Medicine, Mayo Clinic, Rochester MN, 55905

19   <sup>7</sup>CSIR-Centre for Cellular and Molecular Biology, Hyderabad, Telangana 500007, India

20   <sup>8</sup>Academy of Scientific and Innovative Research (AcSIR), Ghaziabad, Uttar Pradesh  
21   201002, India

22 <sup>9</sup>Department of Pharmaceutical Sciences and Computational Chemical Genomics  
23 Screening Center, School of Pharmacy, University of Pittsburgh, 3501 Terrace St  
24 Pittsburgh, PA 15261, USA.

25 <sup>10</sup>Braunschweig Integrated Centre of Systems Biology (BRICS), Rebenring 56, 38106  
26 Braunschweig, Germany.

27

28 \*Correspondence: [stone@iastate.edu](mailto:stone@iastate.edu)

29

30 **Summary**

31 Crosstalk between Rho- and Arf-family GTPases plays an important role in linking actin  
32 cytoskeletal remodeling to membrane protrusion, organelle structure, and vesicle  
33 trafficking. The central actin regulator, WAVE Regulatory Complex (WRC), is a  
34 converging point of Rac1 (a Rho-family GTPase) and Arf signaling in many processes, but  
35 how Arf promotes WRC activation is unknown. Here we reconstituted a direct interaction  
36 between Arf and WRC. This interaction can be greatly enhanced by Rac1 binding to the D  
37 site of the WRC. Arf1 binds to a newly identified conserved surface on Sra1 located  
38 between the D site and the WH2 helix of WAVE1, which can drive WRC activation using  
39 a mechanism distinct from that of Rac1. Mutating Arf binding site abolishes Arf1-WRC  
40 interaction, disrupts Arf1-mediated WRC activation, and impairs lamellipodia morphology.  
41 This work uncovers a new mechanism underlying WRC activation and provides a  
42 mechanistic foundation for studying how WRC-mediated actin polymerization links Arf  
43 and Rac signaling in the cell.

44

45

46 **Keywords**

47 Arf1, Rac1, GTPase, Wiskott-Aldrich Syndrome protein, WAVE Regulatory Complex,

48 WRC, actin, Arp2/3, lamellipodia

49

## 50 **Introduction**

51 Small GTPases of the Ras superfamily control diverse processes throughout  
52 eukaryotic cells (Wennerberg et al., 2005). Among them, the distantly related Arf-family  
53 and Rho-family GTPases play distinct roles and yet have extensive crosstalk in many  
54 different processes. Arf GTPases are key players in various steps of membrane trafficking  
55 and organelle morphogenesis, where they are best known to promote the assembly of coat  
56 proteins to initiate vesicle formation (D'Souza-Schorey and Chavrier, 2006; Donaldson  
57 and Jackson, 2011; Gillingham and Munro, 2007; Sztul et al., 2019). Rho GTPases, such  
58 as Rac1, are central regulators of the actin cytoskeleton in the formation of various cell  
59 membrane protrusions, such as lamellipodia and filopodia, where they are best known to  
60 promote cell migration, adhesion, and endocytosis (Etienne-Manneville and Hall, 2002;  
61 Mosaddeghzadeh and Ahmadian, 2021). Since it was discovered over two decades ago  
62 (Boshans et al., 2000; D'Souza-Schorey et al., 1997; Radhakrishna et al., 1999; Santy and  
63 Casanova, 2001), the crosstalk between Arf- and Rac1-mediated signaling pathways has  
64 been recognized as an essential component for the regulation of actin cytoskeletal  
65 dynamics during cell migration, spreading, adhesion, fusion, phagocytosis, and  
66 endocytosis (Boshans et al., 2000; Chen et al., 2003; D'Souza-Schorey et al., 1997; Hunt  
67 et al., 2022; Myers and Casanova, 2008; Phuyal and Farhan, 2019; Radhakrishna et al.,  
68 1999; Santy and Casanova, 2001; Singh et al., 2017). Nevertheless, our knowledge of the  
69 underlying molecular mechanism remains fragmental.

70 In addition to the role of Arf in regulating phospholipid microenvironment (Honda  
71 et al., 1999; Krauss et al., 2003), endosomal recycling of Rac1 (Balasubramanian et al.,  
72 2007; Boshans et al., 2000; Radhakrishna et al., 1999), and the localization and activity of

73 Rac1 GEFs (Chen et al., 2003; Koo et al., 2007; Palacios et al., 2002; Santy et al., 2005),  
74 GAPs(Hu et al., 2009), and adaptors (D’Souza-Schorey et al., 1997; Tarricone et al., 2001),  
75 a plethora of studies have underscored the convergence of Arf and Rac1 on a central actin  
76 nucleation promotion factor known as the WAVE Regulatory Complex (WRC) in many  
77 processes (Humphreys et al., 2012b, 2012a, 2013, 2016; Koronakis et al., 2011; Lewis-  
78 Saravalli et al., 2013; Marchesin et al., 2015; Singh et al., 2019, 2020). The WRC is a 400-  
79 kDa protein assembly containing five conserved proteins: Sra1 (or Cyfip2), Nap1 (or  
80 Hem1), Abi2 (or Abi1, Abi3), HSPC300, and WAVE1 (or WAVE2, WAVE3, members  
81 of the Wiskott-Aldrich Syndrome protein family). In the basal state, the WRC keeps  
82 WAVE auto-inhibited in the cytosol by sequestering the WCA (WH2-central-acidic)  
83 sequence at the C-terminus of WAVE through a collection of interactions with the Sra1  
84 subunit and the “meander” sequence of WAVE (**Figure 1**, cartoon) (Chen et al., 2014a,  
85 2010; Derivery et al., 2009; Eden et al., 2002; Ismail et al., 2009). Various membrane  
86 ligands can directly interact with and recruit the WRC to the plasma membrane and  
87 simultaneously activate it to release the WCA, which in turn can bind the Arp2/3 complex  
88 to polymerize branched actin filaments (Chen et al., 2014b, 2017; Koronakis et al., 2011;  
89 Lebensohn and Kirschner, 2009; Padrick et al., 2008; Rottner et al., 2021; Takenawa and  
90 Suetsugu, 2007; Zou et al., 2018). Among these ligands, Rac1 is the canonical activator of  
91 the WRC (Rottner et al., 2021). It acts by directly binding to two distinct locations on the  
92 opposite ends of the Sra1 subunit, which are named A and D sites, respectively. The two  
93 sites have ~40-fold difference in the affinity for Rac1 (Chen et al., 2017, 2010). The recent  
94 cryo-EM structures revealed that Rac1 binding to the low affinity site (A site), but not the

95 high-affinity site (D site), drives a conformational change to allosterically destabilize the  
96 WCA leading to WRC activation (Ding et al., 2022).

97       The connection between Arf1, Rac1 and the WRC was initially discovered by  
98 proteomic and cellular studies to identify proteins important for clathrin-AP-1-coated  
99 carrier biogenesis at the trans-Golgi network (TGN) (Anitei et al., 2010; Baust et al., 2006).  
100 A more direct connection was established in a seminal study by Koronakis and colleagues  
101 in 2011, in which they reconstituted WRC activation using lipid-coated beads and  
102 mammalian brain lysates (Koronakis et al., 2011). They found lipid-coated beads  
103 containing individual Rac1 or Arf1 only bound and activated WRC weakly, but beads  
104 containing both GTPases dramatically enhanced WRC membrane recruitment and  
105 activation (Koronakis et al., 2011). After that, a series of studies further corroborated the  
106 connection of Arf to the WRC. For example, Arf79 (the Arf1 homolog in *Drosophila*) was  
107 found to be critical for Sra1 localization and concomitant formation of lamellipodia  
108 (Humphreys et al., 2012a). This function could not be complemented by Rac  
109 overexpression, but could be restored by expressing the human Arf1, underlining the  
110 importance of Arf1 to WRC activation and the conserved role of the Arf-WRC interaction  
111 across species (Humphreys et al., 2012a). Furthermore, two different types of bacterial  
112 pathogens, *Salmonella enterica* and enteropathogenic and enterohemorrhagic *Escherichia*  
113 *coli* (EPEC and EHEC), could both hijack the Arf1-Rac1-WRC signaling axis to facilitate  
114 infection, albeit with opposite objectives (from the bacteria point of view) and via distinct  
115 mechanisms (Humphreys et al., 2012b, 2013, 2016). In addition, the cooperative actions of  
116 Arf1 (or Arf6) and Rac1 on the WRC were found to be critical for the migration of invasive  
117 MDA-MB-231 breast cancer cells (Lewis-Saravalli et al., 2013; Marchesin et al., 2015).

118 Moreover, a missense mutation in *Hem1* from patients with an inherited immunologic  
119 syndrome named immunodeficiency-72 with an autoinflammation (IMD72) was found to  
120 disrupt Arf1-, but not Rac1-mediated WRC activation (Cook et al., 2020).

121 Despite the importance of Arf1-Rac1-WRC signaling in various normal and  
122 disease-related processes, the mechanism by which Arf1 achieves this function is unknown.  
123 Sharing less than 30% sequence identity with Rac1, Arf1 may use a distinct mechanism to  
124 regulate the WRC. But does Arf1 directly interact with the WRC or Rac1 at all? If yes,  
125 what is the interaction mechanism, and what is the biochemical and structural basis of the  
126 cooperativity between Arf1 and Rac1? To answer these questions, here we have  
127 reconstituted a direct interaction between Arf and the WRC in solution by using purified  
128 proteins. We find the interaction is greatly enhanced by Rac1 binding to the WRC mainly  
129 on the D site. Remarkably, once bound to the WRC, Arf1 can directly activate the WRC  
130 independent of Rac1 binding to the A site. We further identified the Arf1 binding site,  
131 which is located at a conserved surface on Sra1 between the D site and the W helix of the  
132 WCA domain of WAVE. Mutating the Arf1 binding site abolished Arf1 binding, disrupted  
133 Arf1-mediated WRC activation, and impaired lamellipodia morphology. Together, our  
134 work reveals a new mechanism underlying WRC activation and paves the way for  
135 understanding how WRC-mediated actin polymerization integrates signals from Arf and  
136 Rac in various processes.

137

138

139

140



141 **Results**

142 **Arf GTPases directly interact with WRC, and the interaction is greatly enhanced by**

143 **Rac1**

144 The interaction between Arf1 and WRC was initially discovered using lipid-coated  
145 beads where both Arf1 and Rac1 were anchored on the membrane and incubated with  
146 mammalian brain extracts (Koronakis et al., 2011). To examine if the Arf1-WRC  
147 interaction is direct and, if yes, to determine the underlying mechanism, we reconstituted  
148 this interaction in solution using recombinantly purified proteins. We found that GST-  
149 tagged Arf1 could directly pull down both the full-length (FL) WRC and a truncated WRC  
150 named  $\Delta$ WRC230 (**Figure 1A**, lane 4, 10) (Chen et al., 2014a, 2017).  $\Delta$ WRC230 represents  
151 the minimal, structured core of the WRC, since it lacks the C-terminal unstructured proline-  
152 rich region (PRR) and the WCA sequence of WAVE1, as well as the unstructured PRR  
153 and the SH3 domain of Abi2 (**Figure 1A**, cartoon). Although the binding signals were  
154 weak, they were specific in comparison to the background signals in GST controls (**Figure**  
155 **1A**, lane 2 vs. 4, lane 7 vs. 10). Thus, Arf1 directly interacts with the WRC, and the  
156 structured core of the WRC is sufficient to bind Arf1.

157 To test if and how Rac1 can enhance Arf1 binding to the WRC, we used a Rac1  
158 that contained two mutations, Q61L and P29S, which greatly enhanced Rac1 binding to  
159 the WRC as shown in our previous studies (Chen et al., 2017). Unless otherwise noted, we  
160 refer to this Rac1<sup>Q61L/P29S</sup> construct as Rac1 or Rac1<sup>QP</sup> interchangeably in this study. We  
161 found including free Rac1 in the pull-down reactions drastically enhanced GST-Arf1  
162 binding to the WRC (**Figure 1A**, lane 6, 9). Note that Rac1 did not directly interact with  
163 Arf1 (**Figure 1A**, lane 5), but was co-retained with WRC by GST-Arf1 (**Figure 1A**, lane

164 6, 9). These results suggest that Arf1 and Rac1 can simultaneously bind to the same WRC  
165 via non-overlapping binding sites, and that Rac1 binding greatly stabilizes Arf1 binding.

166 As molecular switches, GTPases usually use the GTP state to engage with  
167 downstream effector proteins. We found that the Arf1-WRC interaction was also  
168 dependent on the nucleotide state of Arf1. Only Arf1 loaded with GTP, but not GDP,  
169 showed robust binding (**Figure 1B**, lane 4 vs. 5). Moreover, the interaction could be  
170 specifically blocked by EspG, a bacterial effector protein secreted into the host cell by  
171 enteropathogenic (EPEC) and enterohaemorrhagic (EHEC) *Escherichia coli* during  
172 infection (Dong et al., 2012; Humphreys et al., 2016). EspG directly binds the GTP-form  
173 of Arf1 and Arf6 (Dong et al., 2012; Humphreys et al., 2016) (also see **Figure 1B**, lane 1-  
174 3). This interaction was suggested to disrupt Arf-WRC signaling in host cells, which helped  
175 these extracellular pathogens evade WRC-mediated phagocytosis (Humphreys et al., 2016).  
176 Our data suggest EspG can achieve this by directly competing off Arf1 (and/or Arf6)  
177 binding to the WRC. Therefore, Arf1 may use the same surface to interact with the WRC  
178 and EspG.

179 We next used our previously established equilibrium pull-down (EPD) assay to  
180 quantitatively measure the enhancement of Arf1 binding by Rac1 (Chen et al., 2017;  
181 Pollard, 2010) (**Figure 1C**). We found that in the absence of Rac1, the Arf1-WRC  
182 interaction was weak, with a dissociate constant  $K_D \sim 23 \mu\text{M}$  (**Figure 1C**, black). By  
183 contrast, in the presence of  $100 \mu\text{M}$  Rac1, which should saturate both A and D sites of the  
184 WRC (Chen et al., 2017; Ding et al., 2022), Arf1 binding affinity was increased nearly 30  
185 fold ( $K_D \sim 0.66 \mu\text{M}$ , **Figure 1C**, orange). The enhanced binding was not an artifact of high  
186 concentration of free Rac1 included in the assay, as a mutant Rac1, in which the entire

187 Switch I motif critical for WRC binding was removed (herein referred to as Rac1<sup>Dead</sup>;  
188 **Figure S1A**), could not promote Arf1 binding at the same concentration (**Figure 1C**, blue).  
189 Thus, Rac1 can enhance the weak interaction between Arf1 and WRC by ~30 fold.

190 We found Arf1 binding was likely mediated by the Sra1 or Nap1 subunit, but not  
191 WAVE1, Abi2 or HSPC300, as only the dimeric subcomplex containing Sra1/Nap1, but  
192 not the trimeric subcomplex formed by WAVE1/Abi2/HSPC300, showed weak binding  
193 signals comparable to the fully assembled, pentameric WRC (**Figure 1D**, lane 4 vs. 6,  
194 asterisks). Unlike binding to the intact WRC, however, the interaction with the Sra1/Nap1  
195 dimer could not be enhanced by Rac1 (**Figure 1D**, lane 5 vs. 7, asterisks), suggesting that  
196 even though Sra1 or Nap1 may contain the Arf1 binding site, the enhancement of Arf1  
197 binding by Rac1 is dependent on the fully assembled WRC. Moreover, we found that Arf1  
198 binding to WRC was sensitive to both pH and salt concentration, with pH 6-7 and 50 mM  
199 NaCl, but not pH 8 or 100 mM NaCl being able to sustain the binding (**Figure 1E**, lane 2,  
200 6). This indicates that the Arf-WRC binding involves polar interactions (see below).

201 We further tested if the Arf1-WRC interaction is unique to Arf1 or is general to  
202 other Arf-family proteins. In mammals, the Arf family contains six canonical members  
203 (Arf1-Arf6) and various distantly related Arf-like proteins (Arl) (Gillingham and Munro,  
204 2007; Sztul et al., 2019). Based on sequence similarities, Arf1-Arf6 can be further divided  
205 into three classes: Class I (Arf1, 2, 3), Class II (Arf4, 5) and Class III (Arf6). We found  
206 that besides Arf1, Arf5 and Arf6 also robustly bound the WRC in a Rac1-dependent  
207 manner, although perhaps with slightly different affinities (**Figure 1F**, lane 1-6). By  
208 contrast, Arl1 or Arl2 did not show clear binding (**Figure 1F**, lane 7-10). These results  
209 suggest that the six members of Arf family, but perhaps not the more divergent Arl proteins,

210 can use the same mechanism to interact with the WRC. Together, our biochemical  
211 reconstitution established a direct, nucleotide-dependent interaction between Arf-family  
212 GTPases and WRC. This interaction is greatly enhanced by Rac1 binding to the WRC.

213

#### 214 **Arf1 binding mainly depends on Rac1 binding to the D site**

215 Rac1 can bind to both the A and D sites on WRC, albeit with distinct affinities and  
216 effects on WRC activation (Chen et al., 2017; Ding et al., 2022). Therefore, we asked which  
217 Rac1 binding event was key to promoting Arf1 binding. To answer this question, we first  
218 used single amino acid mutations to specifically disrupt the A or D site from binding to  
219 Rac1 (Chen et al., 2017, 2010; Ding et al., 2022) (**Figure 2A**, cartoon). When Rac1 binding  
220 to the A site was disrupted by Sra1<sup>C179R</sup>, Rac1 binding to the D site still enhanced Arf1  
221 binding, but to a lower extent than the WT WRC (**Figure 2A**, lane 6, 7). By contrast, when  
222 Rac1 binding to the D site was disrupted by Sra1<sup>Y967A</sup>, Rac1 binding to the A site could no  
223 longer promote Arf1 binding (**Figure 2A**, lane 8, 9). These data indicate that Rac1 binding  
224 to the D site plays a more important role in promoting Arf1 binding.

225 To further validate this result, we used EPD assays to directly measure the binding  
226 affinities of Arf1 to WRCs with disrupted A vs. D site. For this, instead of using the above  
227 single amino acid mutations to disrupt either site, which may retain weak, residual Rac1-  
228 binding activity, we inserted an inert protein PGS (glycogen synthase from the extreme  
229 thermophile *Pyrococcus abyssi*) to a surface loop at the A or D site to completely block  
230 Rac1 binding. We herein name the new variants WRC<sup>A-block</sup> and WRC<sup>D-block</sup>, respectively  
231 (**Figure 2B**, cartoon). Being a small, stable protein and with its N- and C- termini located  
232 in close proximity (6.5 Å), PGS was initially used to insert into the human

233 orexin/hypocretin receptors hOX1R and hOX2R to stabilize an intracellular loop and  
234 produce high-resolution diffracting crystals (Yin et al., 2015, 2016). Inserting PGS into the  
235 surface loop of the A or D site did not affect WRC assembly or purification (**Figure S2A**,  
236 **B**) or the basal level of Arf1-WRC interaction in the absence of free Rac1 (**Figure S1C**),  
237 but indeed further reduced the affinity measurement of Rac1 to WRC (from  $K_D \sim 2 \mu\text{M}$  for  
238  $\text{WRC}^{\text{Y967A}}$  to  $\sim 7.5 \mu\text{M}$  for  $\text{WRC}^{\text{D-block}}$ ; **Figure S1B**, blue vs. orange), likely due to  
239 eliminating the residual Rac1 binding to the D site in  $\text{WRC}^{\text{Y967A}}$ . When we blocked the A  
240 site and subjected the D site to  $100 \mu\text{M}$  Rac1, Arf1 binding was enhanced, although not to  
241 the level of WT WRC ( $K_D \sim 5.76 \mu\text{M}$  for  $\text{WRC}^{\text{A-block}}$  vs.  $\sim 0.66 \mu\text{M}$  for the WT WRC;  
242 **Figure 2B**, purple vs. orange; **Figure S1D**), suggesting Rac1 binding to the D site was  
243 partially sufficient to promote Arf1 binding. By contrast, when we blocked the D site and  
244 exposed the A site to  $100 \mu\text{M}$  Rac1, Arf1 binding was not enhanced, but remained similar  
245 to that in the absence of Rac1 or in the presence of  $100 \mu\text{M}$  Rac1<sup>Dead</sup> ( $K_D \sim 38.8 \mu\text{M}$ ; **Figure**  
246 **2B**, blue; **Figure 1C**, black; **Figure S1C**, orange), suggesting Rac1 binding to the A site  
247 alone could not promote Arf1 binding in this specific experimental condition (but see  
248 below).

249 As an alternative strategy to validate the contribution of the D site to Arf1 binding,  
250 we stabilized Rac1 binding to the D site by tethering it to the C-terminus of Sra1 (which  
251 we refer to as  $\Delta\text{WRC230}^{\text{D-Rac1}}$ ) (Ding et al., 2022) or the C-terminus of WAVE1 that lacked  
252 the WCA (which we named  $\Delta\text{WRC230}^{\text{WAVE1-Rac1}}$ ) (Chen et al., 2017) (**Figure 2C**, cartoon).  
253 These constructs stabilize D site Rac1 binding, which had allowed us to solve cryo-EM  
254 structures of the WRC with Rac1 bound to the D site (Chen et al., 2017; Ding et al., 2022).  
255 We found that, without free Rac1, both  $\Delta\text{WRC230}^{\text{D-Rac1}}$  and  $\Delta\text{WRC230}^{\text{WAVE1-Rac1}}$  were

256 able to enhance Arf1 binding to the level of the WT WRC enhanced by free Rac1 (**Figure**  
257 **2C**, lane 4, 5, 7). Furthermore, in the EPD assay,  $\Delta$ WRC230<sup>D-Rac1</sup> without free Rac1  
258 enhanced Arf1 binding to a level nearly identical to that of the WRC<sup>A-block</sup> in the presence  
259 of 100  $\mu$ M Rac1 ( $K_D \sim 5.33 \mu$ M; **Figure 2B**, golden vs. purple). Therefore, supplying Rac1  
260 to the D site by covalent tethering has the same effect in promoting Arf1 binding as  
261 supplying free Rac1 to a WRC with a blocked A site.

262 The above assays confirm that Rac1 binding to the D site is essential for enhancing  
263 Arf1 binding, but also show mutating or blocking the A site dampens this effect (**Figure**  
264 **2A**, lane 7; **Figure 2B**, purple). This indicates that Rac1 binding to the A site should also  
265 play a role, which might have eluded detection in the assays described above due to the  
266 low affinity of the A site for Rac1. The potential cooperativity between A and D sites could  
267 further reduce A site binding when the D site is disrupted (Chen et al., 2017; Ding et al.,  
268 2022). To examine the contribution of the A site more directly, we stabilized Rac1 binding  
269 to the A site by inserting a Rac1 between Y423/S424 in a non-conserved surface loop near  
270 the A site (termed  $\Delta$ WRC230<sup>A-Rac1</sup>; **Figure 2D**, cartoon). This strategy had allowed us to  
271 determine the cryo-EM structure of the WRC with Rac1 bound to the A site and D site  
272 simultaneously (Ding et al., 2022). We found that, without free Rac1, tethering Rac1 to the  
273 A site mildly promoted Arf1 binding (**Figure 2D**, lane 3 vs. 5). Adding free Rac1 to  
274  $\Delta$ WRC230<sup>A-Rac1</sup> to occupy the D site further enhanced Arf1 binding (**Figure 2D**, lane 6).  
275 These data suggest Rac1 binding to the A site partially contributes to Arf1 binding. Taken  
276 together, we conclude Rac1 binding to both A and D sites plays a role in promoting Arf1  
277 binding to the WRC, but with the D site having a major contribution as compared to the A  
278 site.

279

## 280 **Arf1 promotes WRC activation using a novel mechanism distinct from Rac1**

281 Arf1 and Rac1 were shown to cooperatively promote WRC activation on lipid-  
282 coated beads (Koronakis et al., 2011). Since Rac1 binding to the A site is sufficient to  
283 activate the WRC through an allosteric mechanism (Ding et al., 2022), the question  
284 remains: does Arf1 binding merely increase the membrane recruitment of WRC, contribute  
285 to the same allosteric changes driven by Rac1 binding to the A site, or promote WRC  
286 activation through an entirely different mechanism?

287 To distinguish between these possibilities, we first tested if Arf1 differentially binds  
288 to the WRC in the autoinhibited (“closed”) or activated (“open”) state. Previous studies  
289 showed that, as an activator, Rac1 had higher affinity for the “open” conformation  
290 represented by  $\Delta$ WRC230 (which lacks the WCA) than for the “closed” conformation  
291 represented by the WRC that contained WCA (WRC230WCA; **Figure 3A**, cartoon) (Chen  
292 et al., 2017, 2010). If Arf1 is an activator, it should similarly prefer the “open”  
293 conformation. Indeed, we observed less binding for WRC230WCA than  $\Delta$ WRC230, both  
294 in the presence and absence of Rac1 (**Figure 3A**). Our EPD assay further confirmed this  
295 observation (**Figures 3B** and **S1E**). In the absence of free Rac1, Arf1 had very low binding  
296 affinity for WRC230WCA, with a  $K_D$  ( $\sim 107 \mu\text{M}$ )  $\sim 5$  times of  $\Delta$ WRC230 ( $\sim 22.6 \mu\text{M}$ )  
297 (**Figure 3B**, blue vs. black). Addition of a saturating concentration of Rac1 ( $100 \mu\text{M}$ )  
298 enhanced Arf1 binding to both WRC230WCA and  $\Delta$ WRC230, although not to the same  
299 level ( $K_D \sim 8.2 \mu\text{M}$  for WRC230WCA vs.  $K_D \sim 0.66 \mu\text{M}$  for  $\Delta$ WRC230) (**Figure 3B**, purple  
300 vs. orange). These data indicate Arf1 distinguishes the “closed” vs. the “open”  
301 conformation and therefore may act as an activator of the WRC.

302 We next measured whether Arf1 could promote WRC activation in the pyrene-actin  
303 polymerization assay in aqueous solution (as opposed to on membranes as in the previous  
304 study (Koronakis et al., 2011)) (**Figure 3C-E**). For this, the Arf1 construct used in this  
305 study does not contain the N-terminal amphipathic helix (also referred to as Arf1<sup>ΔN17</sup>). This  
306 helix is important for Arf1 to bind membranes, but is usually dispensable for binding  
307 downstream effectors and therefore often removed in biochemical and structural studies  
308 (Dong et al., 2012; Ren et al., 2013). In the absence of Rac1, Arf1 had no obvious effect  
309 on WRC activity, potentially due to its low binding affinity to WRC230WCA (**Figure 3C**,  
310 brown; **3D**, black). In the presence of low concentrations of Rac1, however, Arf1 enhanced  
311 WRC activation in a dose-dependent manner (**Figure 3C**, red curves; **3D**, red, blue). The  
312 enhanced WRC activation depended on Arf1 GTP-binding as Arf1 loaded with GDP had  
313 no such an effect (**Figure 3C-D**, dashed lines).

314 The above data suggest that, in addition to potentially recruiting WRC to the plasma  
315 membrane, Arf1 directly contributes to WRC activation. Due to the presence of free Rac1  
316 in the above reactions, however, these data cannot tell whether Arf1 acts by promoting the  
317 same conformational changes driven by Rac1 binding to the A site, or by directly activating  
318 the WRC through a separate mechanism. To distinguish between these two mechanisms,  
319 we further tested if Arf1 could activate the WRC230WCA in which a Rac1 molecule was  
320 tethered to the D site (WRC<sup>D-Rac1</sup>; **Figure 3E**, cartoon) (Ding et al., 2022). In this construct,  
321 the tethered Rac1 does not activate the WRC (Ding et al., 2022) (also see **Figure 3E**,  
322 yellow solid curve), but can promote Arf1 binding to the WRC (**Figure 2C**), allowing us  
323 to determine whether Arf1 can activate WRC in the absence of a Rac1 molecule acting  
324 through the A site. Remarkably, in the absence of free Rac1, we found Arf1 activated



325 WRC<sup>D-Rac1</sup> in a dose-dependent manner (**Figure 3E**, red solid curves), while Arf1 loaded  
326 with GDP had no such effect (**Figure 3E**, red dotted curve). To rule out the possibility that  
327 Arf1 may activate WRC by mimicking Rac1 binding to the A site, we disrupted the A site  
328 by the point mutation C179R and found Arf1 still activated WRC<sup>D-Rac1</sup> in a dose-dependent  
329 manner (**Figure S3A**), although with reduced potency perhaps because the mutation  
330 indirectly weakened Arf1 binding. Together, the above data suggest that Arf1 binding can  
331 directly activate WRC, at least *in vitro*, and the Arf1-mediated activation does not involve  
332 an interaction of either Rac1 or Arf1 with the A site. Therefore, Arf1 must use a novel  
333 mechanism to drive WRC activation.

334 It is important to note that the Arf1-mediated WRC activation reached levels similar  
335 to those achieved with Rac1 binding to the A site (**Figure 3E**, black and yellow dotted  
336 curves), suggesting Arf1 binding activates the WRC by releasing the WCA, instead of by  
337 causing protein aggregation (which is believed to cause artificial WRC activation to a much  
338 larger extent than the release of WCA) (Eden et al., 2002; Gautreau et al., 2004; Lebensohn  
339 and Kirschner, 2009). This is consistent with our dynamic light scattering (DLS)  
340 measurement showing that Arf1 did not promote WRC aggregation (**Figure S2J**).

341

#### 342 **Arf1 binds to a conserved site distinct from Rac1 binding sites**

343 How does Arf1 binding activate WRC? To answer this question, we determined the  
344 Arf1 binding site by combining protein docking, surface conservation analysis,  
345 mutagenesis, and molecular dynamics simulation (**Figures 4, 5, S4, S5**). We first searched  
346 for potential binding sites by using several different protein docking programs, including  
347 ClusPro (Desta et al., 2020), HADDOCK (Van Zundert et al., 2016), InterEvDock

348 (Quignot et al., 2018), FRODOCK (Ramírez-Aportela et al., 2016), and HDOCK (Yan et  
349 al., 2020). During the search, we restrained the Switch I and Switch II motifs of Arf1 in  
350 close contact with the WRC, since they usually mediate GTPase-effector interactions.  
351 Combining the docking results with the surface conservation analysis of the WRC by  
352 Consurf (Ashkenazy et al., 2016), we selected a series of conserved surface patches,  
353 mutated the solvent-exposed residues individually or in combination, purified the mutant  
354 WRCs, and used pull-down assays to examine if any mutations could disrupt Arf1 binding  
355 (**Figure S4**).

356 Out of over 12 conserved surfaces that we surveyed, one surface specifically  
357 disrupted Arf1 binding (**Figure S4A**, M1 site; **S4F**, lane 6; **Figure 5A**, lane 10). We named  
358 this site the M site since it is in the middle of the WRC, sandwiched between the D site  
359 and the W helix of the WCA (**Figure 4A**). The M site is a small, conserved, and slightly  
360 negatively charged surface patch on Sra1 (**Figure S4A, B**). Mutating the conserved surface  
361 residues at the M site, either Y986A/E988A ( $\Delta M\#1$ ) or Y948A/T951A ( $\Delta M\#2$ ), disrupted  
362 Arf1 binding, whereas mutating two other conserved residues, W845A/Y849A ( $\Delta M\#3$ ),  
363 near the M site did not disrupt Arf1 binding (**Figure 4B**; **Figure 5A**, lane 10-12; **Figure**  
364 **S4F**), suggesting the effect of  $\Delta M\#1$  and  $\Delta M\#2$  was specific to Arf1 binding. Furthermore,  
365 the WRC carrying  $\Delta M\#1$  or  $\Delta M\#2$  mutations could not be further activated by Arf1  
366 (**Figures 5B, C** and **S3B**). It's important to note that the M site mutations only disrupted  
367 Arf1-mediated activation, but not Rac1-mediated activation (**Figures 5D** and **S3B**). Thus,  
368 these surface mutations are specific in disrupting Arf1 binding and Arf1-mediated  
369 activation, without affecting WRC folding (**Figure S2C-G**) or disturbing Rac1-mediated  
370 activation.

371 Note all four residues are highly conserved in animals (**Figure 4E**). In particular,  
372 Y986 remains strictly Tyrosine from human to sponge, while E988 is only exchangeable  
373 with Aspartate. In non-animal species they are either partially conserved (such as in  
374 amoeba) or not conserved (such as in plants) (**Figure 4E**). This suggests the Arf-WRC  
375 interaction is important for processes unique to animals.

376 To further define the binding mechanism, we applied molecular dynamics (MD)  
377 simulation to optimize binding poses of the top 6 docking models that placed Arf1 at the  
378 M site (**Figure S5A, B**). We then evaluated different models by calculating the molecular  
379 mechanics/Poisson–Boltzmann surface area/weighted solvent accessible surface area  
380 (MM-PBSA-WSAS) free energies of the whole complex and the binding free energy  
381 between Arf1 and WRC (**Figure S5C-I**). Out of the 6 docking models, model C8 gave the  
382 lowest binding free energy (**Figure S5G, I**). Importantly, introducing  $\Delta M\#1$  or  $\Delta M\#2$   
383 mutations onto model C8 increased the binding energy, suggesting they destabilized Arf1-  
384 WRC interaction. By contrast, introducing the control mutation  $\Delta M\#3$  did not affect the  
385 binding energy (**Figure S5I**). These data are consistent with our pull-down assays showing  
386 only  $\Delta M\#1$  & 2, but not  $\Delta M\#3$ , disrupted Arf1 binding (**Figure 5A, S4F**).

387 Note that it was previously shown the M371V mutation in Hem1 (M373V in Nap1)  
388 found in human patients interfered with (but did not abolish) Arf1 binding and WRC  
389 activation (Cook et al., 2020). The above analysis suggests M371 is not the Arf1 binding  
390 site. Rather, the effect of M371V was likely indirect, as this residue is located at the bottom  
391 of a deep pocket neighboring the D site, where it was difficult to accommodate an Arf1  
392 molecule (**Figure S4A**).

393           The MD-optimized model sheds light on how Arf1 binds and activates WRC. First,  
394 the interaction is mediated by the Switch I motif (**Figures 4C** and **S5G**), the same region  
395 that binds to EspG (Dong et al., 2012), explaining how EspG competes off WRC binding  
396 to inhibit phagocytosis during pathogenic *E. coli* infection (Humphreys et al., 2016)  
397 (**Figure 1B**). Second, the interaction mainly involves hydrogen bonding between Y986 and  
398 E988 in Sra1 and T44 and T45 in Arf1, with Y948 or T951 in Sra1 contacting I46 and T44  
399 in Rac1 through Van der Waals interactions (**Figures 4C** and **S5G**). This explains why  
400 Y986A/E988A ( $\Delta M\#1$ ) disrupted Arf1 binding more severely than Y948A/T951A ( $\Delta M\#2$ )  
401 in GST pull-down assays (**Figures 5A** and **S4F**), and is also consistent with our observation  
402 that Arf1 binding is sensitive to pH and salt concentration (**Figure 1E**). Third, the relative  
403 orientation of Arf1 is compatible with the model of how WRC is oriented on the membrane  
404 together with two Rac1 molecules (**Figure 4D**) (Chen et al., 2017, 2010; Ding et al., 2022).  
405 In this orientation, the N-terminus of Arf1 <sup>$\Delta 17$</sup>  is near the plasma membrane (**Figure 4D**,  
406 arrow), which would allow its N-terminal amphipathic helix to associate with membranes.  
407 Finally, this model explains how Arf1 binding may activate the WRC. Arf1 is located near  
408 (but not in direct contact with) the W helix of WCA (**Figure 4D**). Therefore, distinct from  
409 Rac1-mediated WRC activation, which involves a series of conformational changes  
410 propagating from the A site to a conserved region around WAVE1<sup>Y151</sup> (referred to as  
411 Tyrosine lock) to release the WCA (Ding et al., 2022), Arf1 binding may contribute to  
412 WRC activation by directly perturbing the W helix located in its proximity (see models in  
413 **Figure 7**).

414           The identification of the M site allowed us to specifically probe the function of the  
415 Arf1-WRC interaction in the cell. WRC is key to actin polymerization at plasma

416 membranes and formation of sheet-like protrusions known as lamellipodia and membrane  
417 ruffles commonly found at the leading edge of migrating or spreading cells (Rottner et al.,  
418 2021; Takenawa and Suetsugu, 2007) (**Figure 6A**). In our previous complementation  
419 assays using B16-F1 cells genetically disrupted for both *Sra1* and *Cyfp2* genes, mutating  
420 the A site almost completely abolished WRC-mediated lamellipodia formation, while  
421 mutating the D site impaired (but did not eliminate) actin assembly and lamellipodia  
422 morphology (Schaks et al., 2018, 2020). Using the same assay, we found mutating the M  
423 site produced phenotypes nearly identical to mutating the D site (**Figure 6B-D**). In both  
424 cases, mutations led to narrow actin networks and reduced the formation frequency of  
425 mature lamellipodia, but without affecting WRC localization or assembly (**Figure 6B, D**).  
426 Interestingly, when we combined the M site and D site mutations into one construct, they  
427 did not aggravate the phenotype, except that the  $\Delta D/\Delta M\#2$  dual mutations slightly  
428 decreased the total percentage of lamellipodia-containing cells (**Figure 6E-G**). Together,  
429 the above results suggest that the M and D sites act in the same mechanistic pathway to  
430 regulate lamellipodial morphology, with Arf1 binding to the M site likely acting  
431 downstream of Rac1 binding to the D site (see *in vitro* data above).

432

### 433 **Discussion**

434 By biochemical reconstitution and structural analysis, our work establishes that  
435 Arf1 directly interacts with the WRC through a previously unidentified conserved surface  
436 located on *Sra1*. We show that, although intrinsically weak, this interaction can be greatly  
437 enhanced by Rac1 binding to the D site. Once bound to the WRC, Arf1 can independently  
438 drive WRC activation, at least *in vitro*, by using a mechanism distinct from that mediated

439 by Rac1 binding to the A site. We further demonstrate that disrupting Arf1-WRC  
440 interaction by point mutations specifically abolishes Arf1-mediated (but not Rac1-  
441 mediated) WRC activation, and impairs WRC-mediated lamellipodia formation. Our work  
442 has important implications on the regulation of the actin cytoskeleton in many different  
443 biological systems.

444 First, our study established a new mechanism underlying WRC activation. The  
445 WRC is a central signaling hub through which a large diversity of membrane ligands can  
446 transmit signals to Arp2/3 complex-mediated actin polymerization (Chen et al., 2014b,  
447 2017; Lebensohn and Kirschner, 2009; Rottner et al., 2021). Despite the long list of WRC  
448 ligands, Rac1 has been known as the only activator that is both necessary and sufficient—  
449 at least *in vitro*—to activate WRC (Chen et al., 2017; Schaks et al., 2018). While other  
450 ligands may act cooperatively with Rac1 to further tune WRC activity, exactly how they  
451 do so is completely unknown (Chen et al., 2014b, 2014c; Koronakis et al., 2011; Lebensohn  
452 and Kirschner, 2009). In particular, how Arf1 facilitates WRC activation has remained  
453 enigmatic for many years. It was not known if Arf1 can directly interact with WRC, and if  
454 yes, how Arf works together with Rac1 to promote WRC activity (Singh et al., 2019). Our  
455 work provides firm answers to these questions, revealing that significant Arf1 binding  
456 relies on Rac1 binding mainly to the D site, but Arf1 binding can directly promote WRC  
457 activity even independently of Rac1 binding the A site. These results establish Arf1 as a  
458 second, genuine activator of the WRC and provides a mechanism to explain the  
459 cooperativity between Arf1 and Rac1 previously observed both *in vitro* and in cells  
460 (Boshans et al., 2000; Koronakis et al., 2011; Radhakrishna et al., 1999; Santy and  
461 Casanova, 2001).

462           Second, our study lays a foundation for studying how WRC-mediated actin  
463 polymerization connects various Arf- and Rac1-mediated processes. Our work identifies  
464 point mutations that can specifically disrupt Arf binding and Arf-mediated (but not Rac1-  
465 mediated) WRC activation. These mutations will be powerful tools for dissecting the role  
466 of the Arf-WRC-Arp2/3-actin signaling axis from the canonical Rac1-WRC-Arp2/3-actin  
467 axis. Arf-family GTPases play an important role in various membrane trafficking processes,  
468 with some of them tightly connected to actin cytoskeleton regulation (Myers and Casanova,  
469 2008; Singh et al., 2017; Sztul et al., 2019). On the other hand, new roles of actin, WRC,  
470 and Arp2/3 complex are emerging, suggesting their importance in the endomembrane  
471 systems beyond their canonical role in driving plasma membrane protrusions (Anitei et al.,  
472 2010; Cheng et al., 2007; Kang et al., 2010; Sung et al., 2008). We thus posit that Arf-  
473 mediated WRC activation provides the cell with an additional pathway for promoting WRC  
474 activation and actin polymerization, the precise outcome of which will likely depend on  
475 relative local membrane densities of Rac1 vs. Arf (**Figure 7**). Specifically, Rac1 binding  
476 to the high-affinity D site may serve as a general recruitment mechanism to prime the WRC  
477 on the membrane without causing activation. Then, depending on specific upstream signals  
478 in distinct cell types and tissues leading to activation of various Arf- or Rac1-GEFs, the  
479 precise tuning of WRC activation in given condition and system will depend on the local  
480 density of activated Rac1 or Arf molecules, which can subsequently trigger WRC  
481 activation by distinct structural mechanisms (**Figure 7**).

482           Third, the Arf binding site is highly conserved in animals, from human to sponge,  
483 but is only partially conserved in other organisms and is not conserved in plants. This  
484 suggests that the function of Arf1-mediated WRC activation is likely important for

485 processes unique to animals, such as neuronal outgrowth and synapse formation, immune  
486 cell chemotaxis and activation, and cancer cell migration and metastasis, in all of which  
487 Arf and WRC play important roles (Donaldson and Jackson, 2011; Myers and Casanova,  
488 2008; Rottner et al., 2021; Singh et al., 2017; Sztul et al., 2019). In non-animal species,  
489 while sequence analysis of the M site suggests the direct interaction between Arf and the  
490 WRC is perhaps lost (**Figure 4E**), considering the conserved importance of Arf and WRC  
491 in non-animal species, we cannot rule out the possibility that the M site surface and Arf  
492 molecules may still have co-evolved to keep the connection between Arf and the WRC  
493 maintained. Our work raises the possibility of exploring the role of Arf-related processes  
494 in WRC-mediated actin polymerization in both animal and non-animal organisms.

495 Together, this work uncovers a new, conserved mechanism underlying WRC  
496 activation, and provides a foundation for exploring the regulation of the actin cytoskeleton  
497 in multiple processes in which Rac and the various Arf-family GTPases may intimately  
498 cooperate.

499

## 500 **Acknowledgements**

501 We thank Shae Padrick at Drexel University for updating the published python codes for  
502 actin data analysis, Aubrey Sijo-Gonzales, Finlan Rhodes, Leyuan Loh, Ganesh Prasad,  
503 Simanta Mitra, and the ResearchIT at Iowa State University for migrating the python codes  
504 to the web-based application, Scott Nelson at Iowa State for use of the fluorimeter, Daniel  
505 Rosenbaum at UT Southwestern for providing the PGS construct, and Neal Alto at UT  
506 Southwestern for providing various Arf, Arl, and EspG constructs. Research was supported  
507 by funding from the National Institutes of Health (R35-GM128786) and Iowa State



508 University and Roy J. Carver Charitable Trust start-up funds to B.C., Stony Brook  
509 University start-up funds to S.C., the Deutsche Forschungsgemeinschaft (DFG), Research  
510 Training Group GRK2223, and individual grant RO2414/8-1 to K.R, the National Institutes  
511 of Health (R01-DK107733) to D.D.B., and the National Science Foundation (1955260)  
512 and National Institutes of Health (R01-GM079383) to J.W.

513

#### 514 **Author contributions**

515 B.C. conceived the project and oversaw biochemical work. K.R. oversaw cell biological  
516 work. J.W. performed MD simulation and energy calculation. S.Y. purified proteins and  
517 performed biochemical experiments. Y.L. and A.B. helped with protein purification and  
518 biochemical assays. M.S. performed cellular experiments. B.D. and S.C. helped with  
519 structural analysis. D.A.K. performed DLS analysis. L.D., O.A., and D.D.B. helped with  
520 cell biological analysis. B.C. wrote the manuscript and prepared figures with assistance  
521 from all authors.

522

#### 523 **Declaration of interests**

524 The authors declare no competing interests.

525

526

527

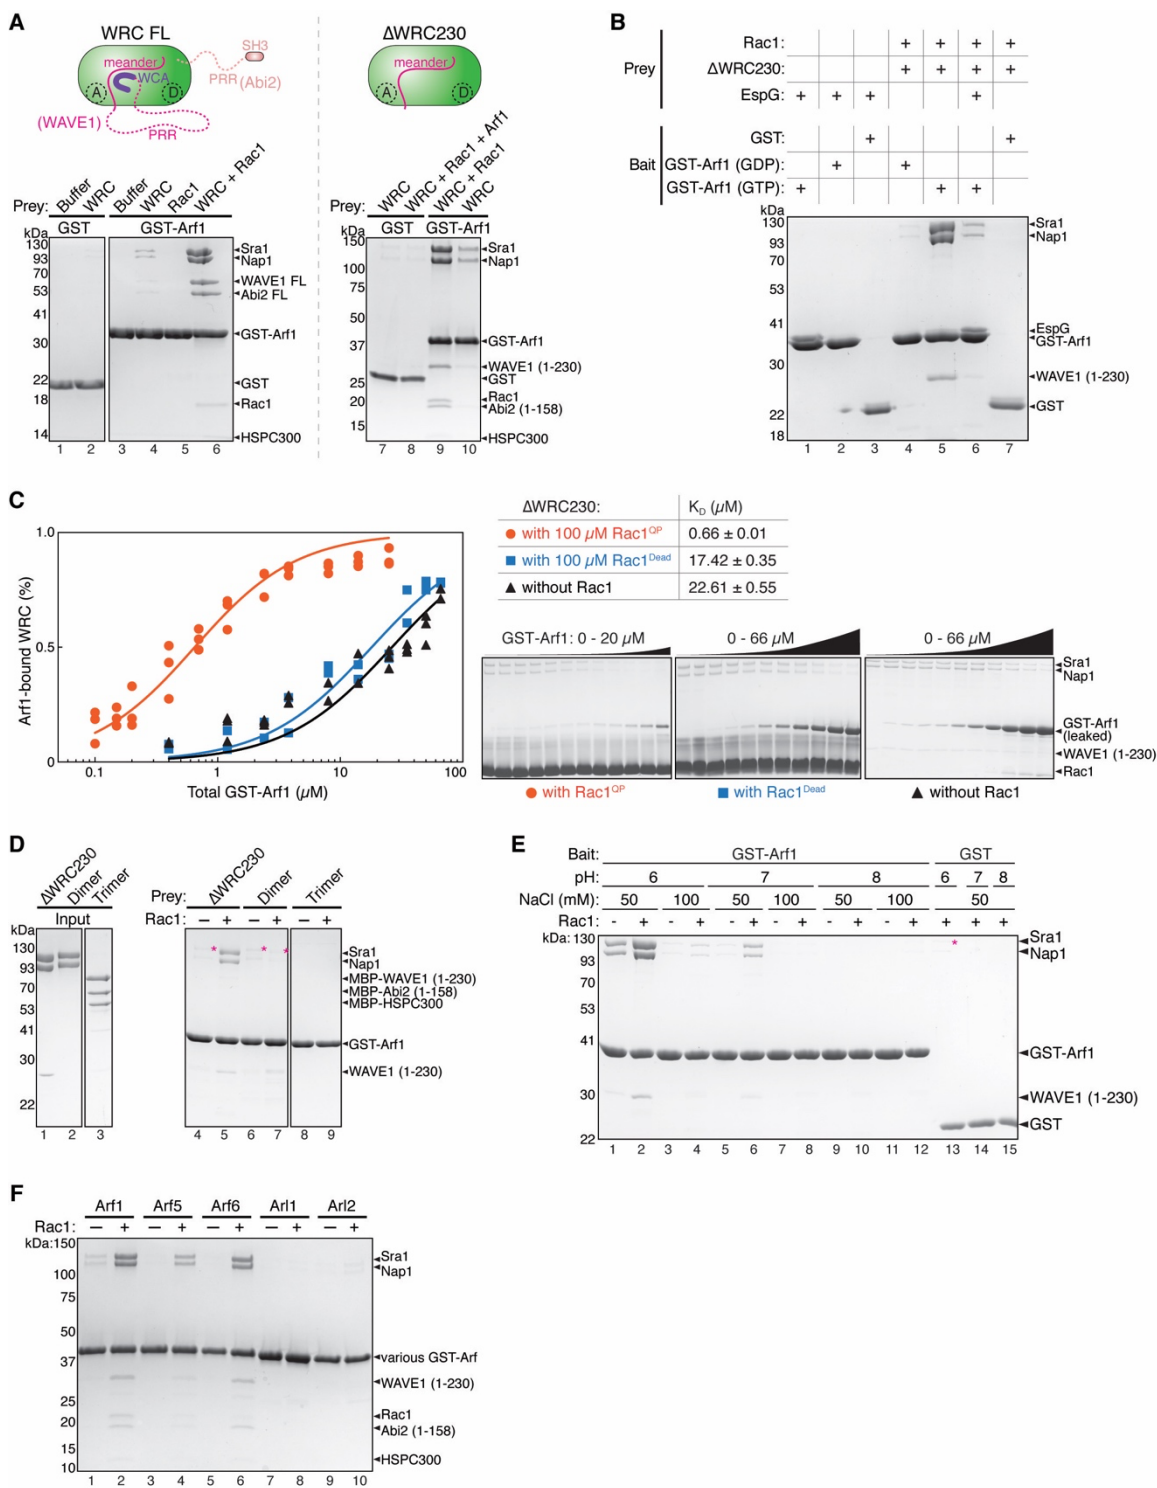

528

529 **Figure 1. Arf-WRC interaction is direct and can be greatly enhanced by Rac1.** (A)

530 Coomassie blue-stained SDS-PAGE gels showing GST-Arf1 pull-down of WRC FL (left)

531 and ΔWRC230 (right) in the presence or absence of untagged Rac1<sup>QP</sup>. In the schematic of

532 respective WRCs, dotted lines indicate unstructured sequences. Both the A and D sites for  
533 Rac1 binding are indicated. **(B)** Coomassie blue-stained SDS-PAGE gels showing pull-  
534 down of  $\Delta$ WRC230 by GST-Arf1 in indicated nucleotide states or in the presence of the  
535 Arf1-binding protein EspG. **(C)** Equilibrium pull-down (EPD) assay to measure the  
536 binding affinity of the Arf1-WRC interaction in the presence of indicated Rac1 variants.  
537 On the left is the quantification of the data pooled from two to three independent  
538 experiments for each condition and globally fitted to obtain the binding isotherms. The  
539 derived dissociation constant ( $K_D$ ) and fitting errors are shown in the table. On the right are  
540 representative Coomassie blue-stained SDS-PAGE gels of the supernatant samples use for  
541 quantification. **(D)** Coomassie blue-stained SDS-PAGE gels showing GST-Arf1 pull-down  
542 of WRC subcomplexes in the presence or absence of Rac1<sup>QP</sup>. Dimer is the Sra1/Nap1  
543 subcomplex. Trimer is the WAVE1 (1-230)/Abi2(1-158)/HSPC300 subcomplex. Asterisks  
544 indicate weak binding signals. **(E)** Arf1 binding to the WRC is sensitive to pH and salt  
545 concentration. Shown is Coomassie blue-stained SDS PAGE from GST-Arf1 pull down of  
546  $\Delta$ WRC230 in indicated buffer conditions, in the presence or absence of Rac1<sup>QP</sup>. Red  
547 asterisk indicates increased background binding to GST beads at pH 6, to avoid which we  
548 use pH 7 and 50 mM NaCl throughout this study. **(F)** Coomassie blue-stained SDS-PAGE  
549 gel showing pull-down of  $\Delta$ WRC230 by different GST-tagged Arf-family members with  
550 or without Rac1<sup>QP</sup>.  
551

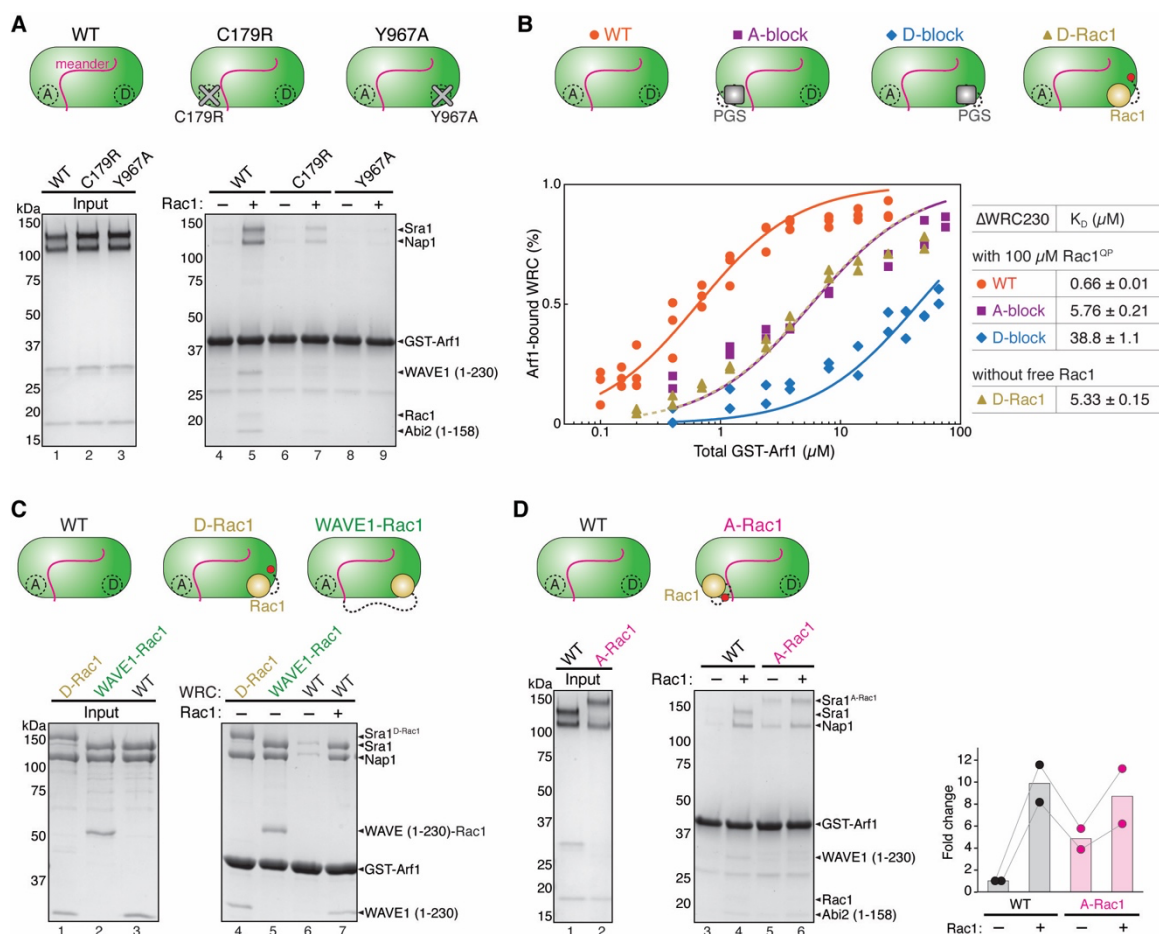

552

553 **Figure 2. Arf1 binding mainly depends on Rac1 binding to the D site.** (A) Coomassie  
554 blue-stained SDS-PAGE gels showing GST-Arf1 pull-down of WRC bearing point  
555 mutations in Sra1 that specifically disrupt the A or D site. (B) EPD assay measuring the  
556 binding affinity of GST-Arf1 for the indicated  $\Delta$ WRC230 constructs in the presence or  
557 absence of 100  $\mu$ M Rac1<sup>QP</sup>. Data for each mutant are pooled from two independent  
558 experiments. Data for the WT WRC are taken from Figure 1C and used here as a reference  
559 point. See Figure S1 for representative gel images. (C) Coomassie blue-stained SDS-PAGE  
560 gels showing GST-Arf1 pull-downs of WRCs with Rac1 tethered to indicated positions to  
561 stabilize Rac1 binding to the D site. (D) Coomassie blue-stained SDS-PAGE gels showing  
562 GST-Arf1 pull-down of WRCs with Rac1 inserted between Y423/S424 of the surface loop

563 (a.a. 418-432) to stabilize Rac1 binding to the A site. Shown on the right is the gel  
564 quantification of the Sra1-Nap1 bands normalized to GST-Arf1 bands from two  
565 independent repeats, with the data from each repeat connected. In the schematic of WRCs,  
566 red dots indicate the tethering points of Rac1 to A or D site.

567

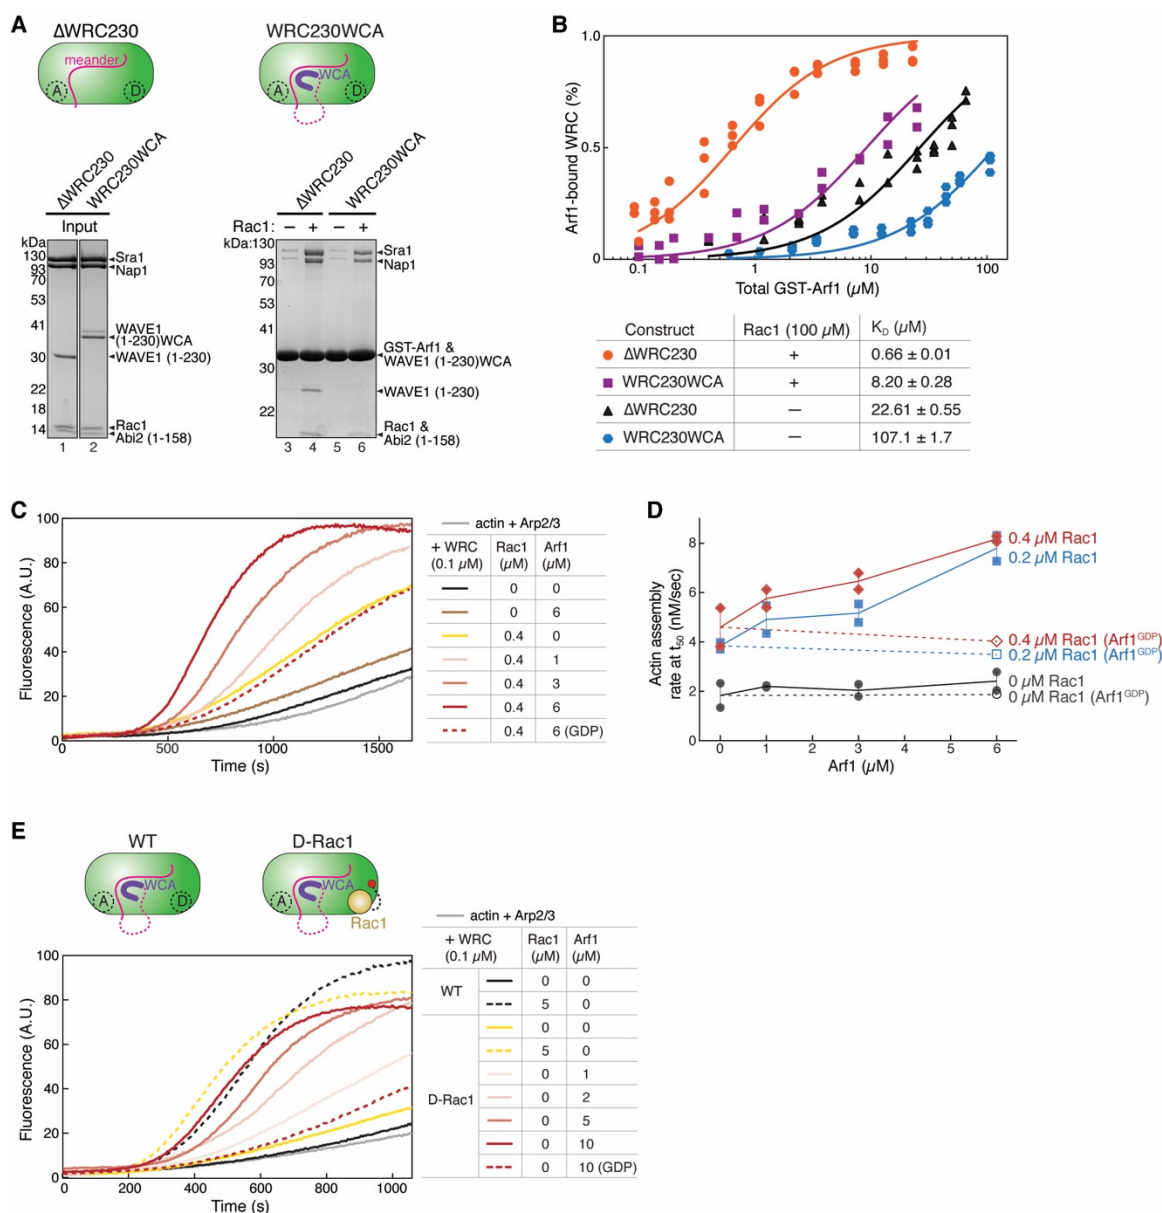

568

569 **Figure 3. Arf1 promotes WRC activation independent of Rac1 binding to the A site.**

570 (A) Coomassie blue-stained SDS-PAGE gels showing GST-Arf1 pull-down of WRC with

571 or without the WCA sequence. (B) EPD assay comparing the binding affinity of GST-Arf1

572 for the WRC with or without the WCA sequence. Data for WRC230WCA are pooled from

573 two independent experiments for each condition. Data for the  $\Delta$ WRC230 are taken from

574 Figure 1C and used here as a reference point. See Figure S1 for representative gel images.

575 (C-D) Representative pyrene-actin polymerization assay (C) and quantification of the actin

576 polymerization rate at  $t_{50}$  (D) (Doolittle et al., 2013) measuring activity of WRC230WCA  
577 in the presence of indicated concentrations of Rac1<sup>QP</sup> and Arf1. (E) Pyrene-actin  
578 polymerization assay of the WT WRC230WCA vs. WRC<sup>D-Rac1</sup> in response to the addition  
579 of free Rac1<sup>QP</sup> or Arf1. Reactions in (C-E) contain 3.5  $\mu$ M actin (5% pyrene labeled), 10  
580 nM Arp2/3 complex, 100 nM WRC, and indicated amounts of Rac1 and/or Arf1. In all  
581 assays, Arf1 is loaded with GMPPNP, unless it is indicated with GDP.  
582

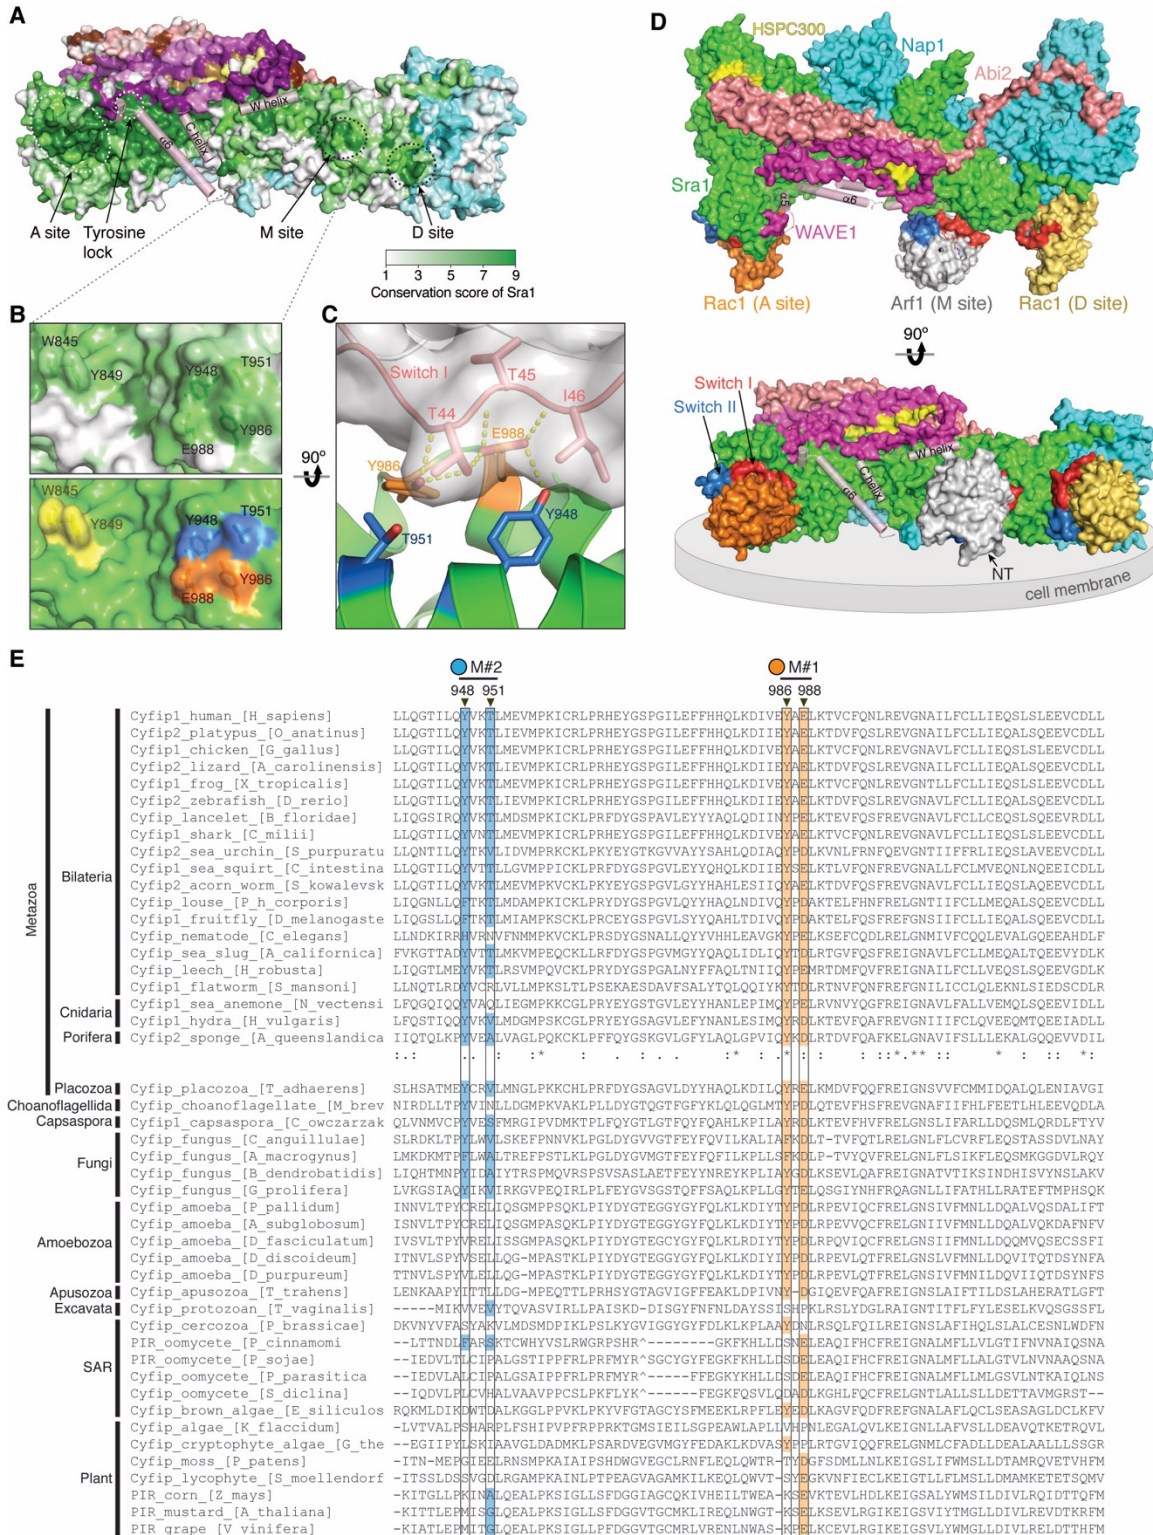

583

584 **Figure 4. Arf1 binds to a conserved site distinct from Rac1 binding sites. (A)** Surface

585 conservation of the WRC, with color to white gradients representing the most conserved



586 surface residues (ConSurf score = 9 for darkest colors) to the least conserved residues  
587 (ConSurf score = 1 for white color) (Ashkenazy et al., 2016). Important sites on Sra1,  
588 including the identified Arf1 binding site (M site), are indicated with dotted circles.  
589 Semitransparent pink cylinders refer to the sequence in WAVE1 that are destabilized upon  
590 WRC activation by Rac1 (Ding et al., 2022). **(B)** Close-up view of the M site showing  
591 surface conservation (top) and surface patches to be mutated (bottom, colored using the  
592 same scheme in Figure 5A). **(C)** Side view showing the interaction between Arf1 and the  
593 M site in the MD-optimized model C8. Contacting residues are shown as sticks. Yellow  
594 dotted lines indicate polar interactions. **(D)** Surface representation of the overall structural  
595 model of the WRC bound to two Rac1 molecules (PDB: 7USE) (Ding et al., 2022) and one  
596 Arf1 molecule (PDB: 1J2J). Position of Arf1 shows the MD-optimized docking solution  
597 C8, which has the lowest binding free energy. Switch I and II elements of Rac1 and Arf1  
598 GTPases are red and blue, respectively. Grey disc demonstrates the predicted orientation  
599 of the WRC at the inner surface of the plasma membrane. The N-terminus of Arf1<sup>ΔN17</sup> used  
600 in this study is indicated with arrow. **(E)** Sequence alignments of Sra1 from representative  
601 eukaryotic organisms. Surface residues of the M site (black boxes) are highlighted with  
602 orange for the M#1 surface patch and blue for M#2, as indicated by black arrowheads on  
603 top. Degrees of conservation in animals (up to Porifera) are represented with ClustalW  
604 symbols (Thompson et al., 1994)(\* for no change, : for conserved, . for less conserved  
605 changes). ‘-‘ for missing amino acids; ‘^’ for amino acid insertions in alignments that were  
606 not shown.  
607

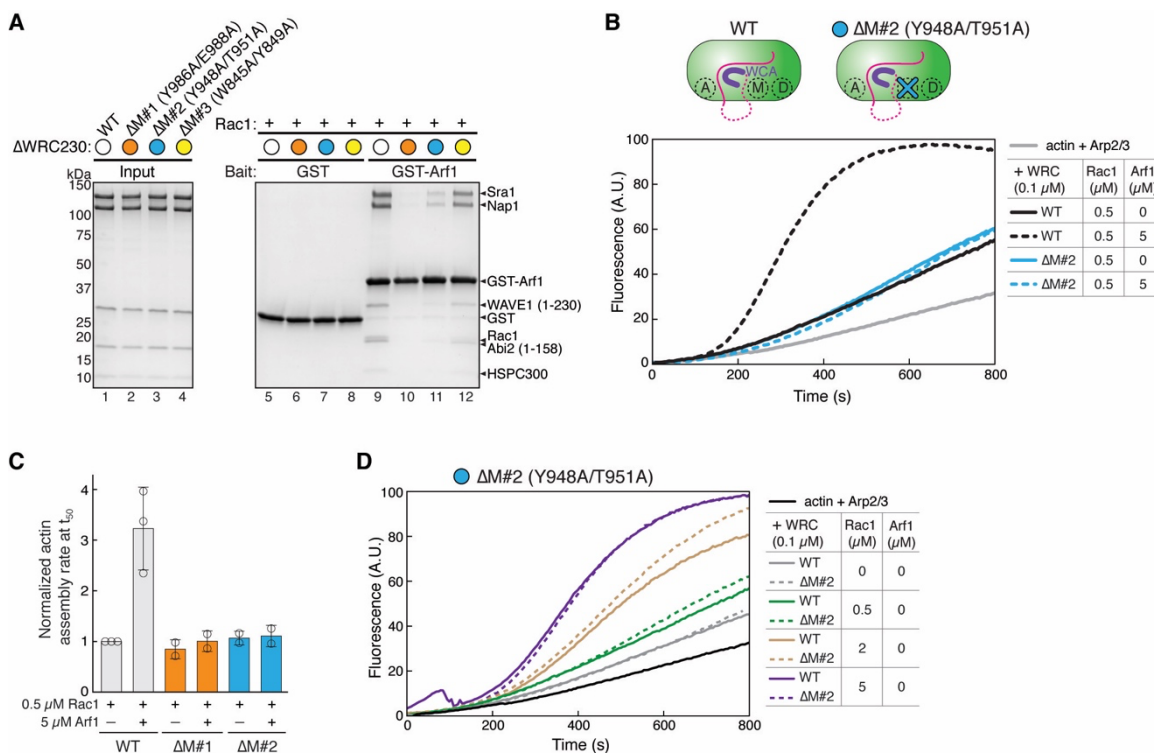

608

609 **Figure 5. M site mutations disrupt Arf1 binding and Arf1-mediated WRC activation.**

610 (A) Coomassie blue-stained SDS-PAGE gels showing GST pull-down of ΔWRC230

611 bearing the indicated mutations in Sra1 at the M site. (B-C) Representative pyrene-actin

612 polymerization assay (B) and quantification of the actin polymerization rate at  $t_{50}$

613 normalized to WT WRC230WCA + 0.5 μM Rac1 (C), measuring the effect of M site

614 mutations on WRC activation by Arf1. Reactions contain 3.5 μM actin (5% pyrene labeled),

615 10 nM Arp2/3 complex, 100 nM WRC230WCA (WT or indicated mutants), and indicated

616 amounts of Rac1<sup>QP</sup> and/or Arf1 loaded with GMPPNP. Error bars represent standard errors

617 of means. (D) Comparison of the WT WRC to the ΔM#2 (Y948A/T951A) mutant activated

618 by different amounts of Rac1<sup>QP</sup>. Reactions were performed in the same conditions as in (B).

619

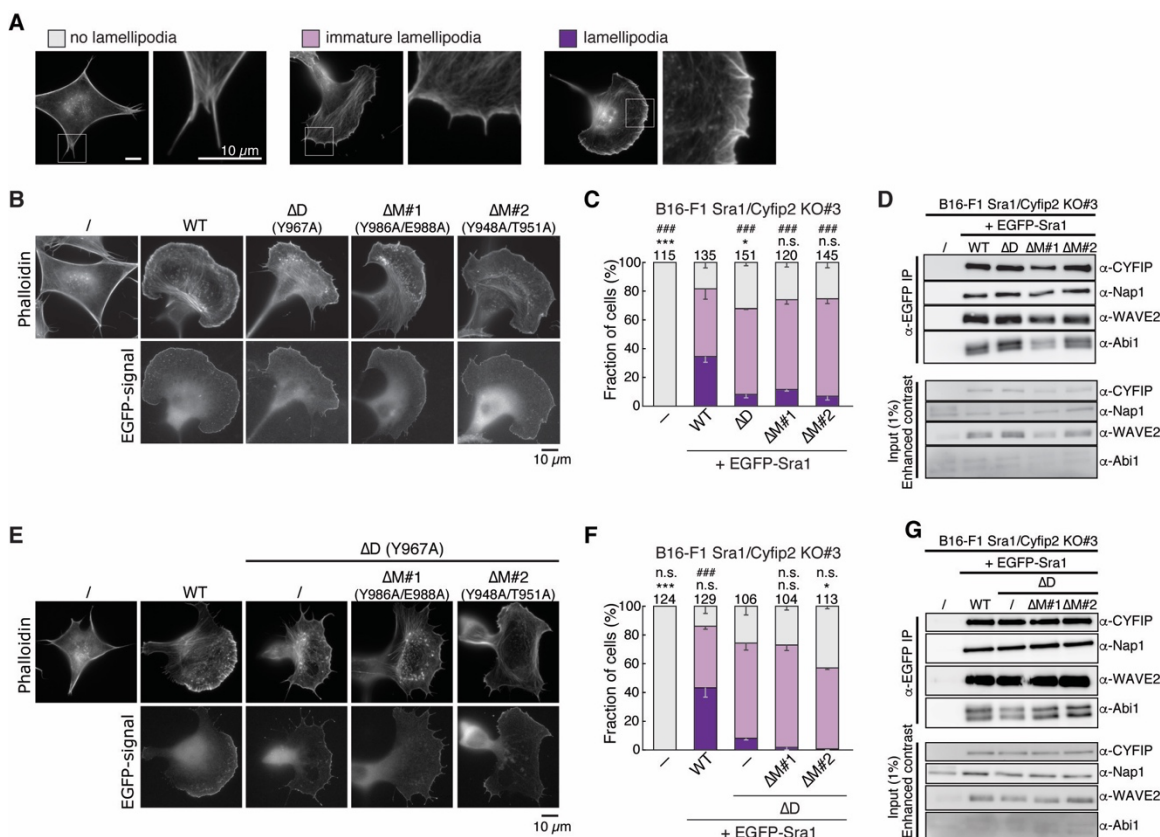

620

621 **Figure 6. M site mutations impaired lamellipodia morphology. (A, B, E)**

622 Representative fluorescence images of lamellipodia formation in B16-F1 *Sra1/Cyfp2*

623 double KO#3 cells transfected with indicated EGFP-Sra1 variants and stained by phalloidin

624 for F-actin. Images show representative examples of the cell morphologies used for

625 categorization of induced effects below. ΔD for *Sra1*<sup>Y967A</sup>, which disrupts the D site. ΔM

626 #1 for *Sra1*<sup>Y986A/E988A</sup>. ΔM #2 for *Sra1*<sup>Y948A/T951A</sup>. (C, F) Quantification of lamellipodial

627 morphologies. Statistical significance was assessed from 3 repeats for differences between

628 cells transfected with WT (wild type) (C) or ΔD (F) vs. no (-) or indicated constructs

629 concerning cell percentages displaying “no lamellipodia” phenotype (\* p < 0.05; \*\*\* p <

630 0.001) and with “lamellipodia” phenotype (### p < 0.001). n.s.: not statistically significant.

631 Error bars represent standard errors of means. Numbers of cells used in the quantification

632 are shown on top of each column. (D, G) Immunoprecipitation (IP) and Western blot of

633 the same B16-F1 *Sra1/CYFIP2* double KO#3 cells used in (B & C and E & F), respectively.

634 The cells were transfected with indicated EGFP-tagged *Sra1* variants, lysed, and probed

635 for the expression and assembly of WRC, as exemplified by CYFIP (for both *Sra1* and

636 *Cyfip2*), *Nap1*, *WAVE2*, and *Abi1*.

637

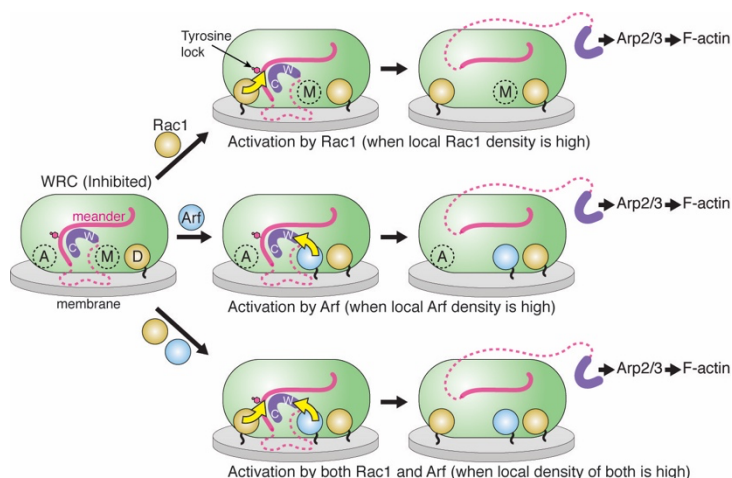

638

639 **Figure 7. Rac1 and Arf may act both cooperatively and separately to promote WRC**

640 **activation.** Schematic showing how the WRC can be activated by Rac1 (top), Arf (middle)

641 and both (bottom) through specific mechanisms that can arise independently from each

642 other. Structural elements critical to WRC inhibition and activation are shown. Yellow

643 arrows indicate structural pathways leading to WRC activation. Magenta dashed lines

644 represent unstructured sequences in WAVE1. Black wiggly lines attached to Arf and Rac1

645 represent membrane binding sequences and lipid modifications of the GTPases. Rac1 first

646 engages with the D site due to its relatively high affinity, which primes the WRC on the

647 membrane without causing activation (left). When Rac1 density on the membrane is high

648 (top), further binding of Rac1 to the A site promotes WRC activation by allosterically

649 destabilizing the Tyrosine lock region, which subsequently releases Y151 (indicated by

650 pink hexagon) and the WCA (purple) (Ding et al., 2022). Alternatively, when Arf1 density

651 on the membrane is high (middle), Rac1 at the D site promotes Arf binding to the M site,

652 which in turn, through its close proximity to the W helix, can perturb WCA binding to

653 promote WRC activation. The remaining part of the schematic displays the functional

654 outcome of both mechanisms operating in cooperation to ensure an optimized output

655 response (bottom).

656

657

658 **Methods**

659 ***Protein purification***

660 All WRC constructs used in this work were derived from previously published  
661 WRC230WCA (also called WRC230VCA or WRC<sup>apo</sup>) and  $\Delta$ WRC230 by standard  
662 molecular biology procedures and were verified by Sanger sequencing (Chen et al., 2014a,  
663 2017; Ding et al., 2022). WRC230WCA contains human full-length Sra1, full-length Nap1,  
664 WAVE1(1-230)-(GGG)<sub>6</sub>-WCA(485-559), Abi2(1-158), and full-length HSPC300.  
665  $\Delta$ WRC230 also contains the same subunits except that WAVE1(1-230)-(GGG)<sub>6</sub>-  
666 WCA(485-559) is replaced by WAVE1(1-230). Other WRCs contain modified subunits  
667 described in detail in **Tables S1** and **S2**.

668 The WRCs were expressed and purified essentially as previously described (Chen  
669 et al., 2014a, 2017). Reconstitution of the recombinant WRC is a multi-step process,  
670 involving purification of individual proteins from different host cells (prokaryotic cell and  
671 insect cell), assembly/purification of sub-complexes (Sra1/Nap1 dimer and  
672 WAVE1/Abi2/HSPC300 trimer) and finally of the WRC pentamer by a series of affinity,  
673 ion exchange and gel filtration chromatography steps. Mutations introduced into WRC  
674 subunits were carefully chosen and typically made to surface-exposed residues, producing  
675 complexes that behaved well and identically to the WT WRC during each step of  
676 reconstitution (**Figure S2**). Except Sra1 and Nap1, which were expressed in *Tni* cells using  
677 the ESF 921 medium (Expression Systems), other proteins were typically expressed in  
678 BL21 (DE3)<sup>T1R</sup> cells (Sigma) at 18 °C overnight or ArcticExpress<sup>TM</sup> (DE3) RIL cells  
679 (Stratagene) at 10°C for 24 hours. GST-Rac1<sup>QP</sup> and GST-Rac1<sup>Dead</sup> were purified by  
680 Glutathione Sepharose beads (Cytiva), followed by cation-exchange chromatography

681 through a Source SP15 column and gel filtration through a Hiloal Superdex 75 column.  
682 GST-Arf1 was purified by Glutathione Sepharose beads, followed by anion-exchange  
683 chromatography through a Source Q15 column and gel filtration through a Hiloal  
684 Superdex 75 column. His8-(GGG)<sub>2</sub>-Arf1 and His6-Tev-EspG were purified by Ni-NTA  
685 agarose beads (Qiagen), followed by anion-exchange chromatography through a Source  
686 Q15 column and gel filtration through a Hiloal Superdex 75 column. Untagged Rac1<sup>QP</sup>  
687 and untagged Rac1<sup>Dead</sup> were purified by SP Sepharose® Fast Flow beads, followed by a  
688 Source SP15 column and a Hiloal Superdex 75 gel filtration column. Proteins including  
689 Arp2/3 complex, actin, WAVE1 WCA, and TEV protease were purified as previously  
690 described (Chen et al., 2014a, 2017; Ismail et al., 2009). All ion exchange and gel filtration  
691 chromatography steps were performed using columns from Cytiva on an ÄKTA™ pure  
692 protein purification system.

### 693 *Non-equilibrium pull-down assay*

694 Non-equilibrium GST pull-down experiments were performed as previously  
695 described (Chen et al., 2017). Typically, 100-200 pmol of GST-tagged proteins as baits  
696 and 100-200 pmol of WRCs as preys were mixed with 20 µL of Glutathione Sepharose  
697 beads (Cytiva) in 1 mL of binding buffer (10 mM HEPES pH 7, 50 mM NaCl, 5% (w/v)  
698 glycerol, 0.05% (w/v) Triton X100, 2 mM MgCl<sub>2</sub>, and 5 mM β-mercaptoethanol or 1 mM  
699 DTT) at 4 °C for 30 min, followed by three washes using 1 mL of the binding buffer in  
700 each time of wash. Bound proteins were eluted with the GST elution buffer (100 mM Tris-  
701 HCl pH 8.5, 2 mM MgCl<sub>2</sub>, and 30 mM reduced glutathione) and examined by SDS-PAGE.

### 702 *Equilibrium pull-down (EPD) assay*



703 Equilibrium pull-down (EPD) experiments were performed essentially as  
704 previously described (Chen et al., 2017). Glutathione Sepharose beads (Cytiva) were first  
705 equilibrated in EPD buffer (10 mM HEPES pH 7, 50 mM NaCl, 5% (w/v) glycerol, 2 mM  
706 MgCl<sub>2</sub>, and 1 mM DTT) and stored as a 50% (v/v) slurry. Before use, all protein samples  
707 were dialyzed against EPD buffer overnight at 4 °C or purified by gel filtration through a  
708 column equilibrated with the EPD buffer to maximize buffer match. Each reaction was  
709 assembled in 100 μL of total volume of EPD buffer in a 200-μL PCR tube (Axygen), which  
710 contained 0.1 μM prey (e.g., WRC), varying concentrations of bait (e.g., GST-Arf1), with  
711 or without 100 μM untagged Rac1<sup>QP</sup> or Rac1<sup>Dead</sup>, 30 μL of the Glutathione Sepharose beads  
712 (by aliquoting 60 μL of the 50% (v/v) slurry using a wide-bore pipette tip), and 0.05%  
713 (w/v) Triton X100 to facilitate mixing. The reactions were gently mixed at 4 °C on a rotary  
714 mixer for 30 min. After a brief centrifugation (~10,000 g for 10 s) to pellet the beads, 40  
715 μL of the supernatant was immediately transferred to 8 μL of 6 X loading buffer (360 mM  
716 Tris-HCl pH 6.8, 12% (w/v) SDS, 60% (w/v) glycerol, 0.012% (w/v) bromophenol blue,  
717 and 140 mM freshly added β-mercaptoethanol), and analyzed by Coomassie blue-stained  
718 SDS-PAGE gels. The gels were imaged by a ChemiDoc™ XRS + system (BioRAD). Total  
719 intensity of the Sra1 and Nap1 bands was quantified by ImageJ (FIJI) to determine unbound  
720 WRC. The derived fractional occupancy from 2 to 3 independent experiments was pooled  
721 to obtain the binding isotherms for global fitting. The program Prism 8 (GraphPad) was  
722 used to fit the binding isotherms using the equation below to obtain dissociation constants

723  $K_D: y = \frac{(W+x+K_D) - \sqrt{(W+x+K_D)^2 - 4*W*x}}{2*W}$ , where  $y$  is the fractional occupancy,  $W$  is the total  
724 WRC concentration (typically 0.1 μM), and  $x$  is the total GST-Arf1 concentration.

725 ***Pyrene-actin polymerization assay***

726 Actin polymerization assays were performed as previously described with some  
727 modifications here (Chen et al., 2017). Each reaction (120  $\mu$ L) contained 3-4  $\mu$ M actin (5%  
728 pyrene labeled), 10 nM Arp2/3 complex, 100 nM of various WRC230WCA constructs or  
729 WAVE1 WCA, and desired concentrations of untagged Rac1<sup>QP</sup> and /or His8-Arf1 in the  
730 NMEH20GD buffer (50 mM NaCl, 1 mM MgCl<sub>2</sub>, 1 mM EGTA, 10 mM HEPES pH7.0,  
731 20% (w/v) glycerol, and 1 mM DTT). We found that compared to the commonly used  
732 KMEI20GD buffer (50 mM KCl, 1 mM MgCl<sub>2</sub>, 1 mM EGTA, 10 mM Imidazole pH7.0,  
733 20% (w/v) glycerol, and 1 mM DTT), the NMEH20GD buffer increased the sensitivity of  
734 WRC to Rac1 and Arf1, allowing us to use lower protein concentrations and reduce  
735 reaction time in actin assembly assays. Pyrene-actin fluorescence was recorded every 5  
736 seconds at 22 °C, one reaction per measurement using a single-channel pipette to minimize  
737 air bubbles or pipetting errors, using a 96-well flat-bottom black plate (Greiner Bio-One™)  
738 in a Spark plate reader (Tecan), with excitation at 365 nm and emission at 407 nm (15 nm  
739 bandwidth for both wavelengths). Actin assembly rates at the time where the fluorescence  
740 intensity is half of the maximum plateau ( $t_{50}$ ) were derived from the kinetic curves using  
741 previously published python scripts (Doolittle et al., 2013), which is also implemented on  
742 a web application of the scripts (<https://biochempy.bb.iastate.edu>).

#### 743 ***Dynamic light scattering (DLS) measurement***

744 All experiments were performed on a Wyatt DynaPro NanoStar instrument using  
745 Dynamics 7.1.7 software. Sample definitions were as follows: Mw-R model: Globular  
746 Proteins; dn/dC (mL/g): 0.185; RG Model: Sphere; Cuvette: Glass Cuvette; Solvent Name,  
747 Glycerol 5%. Otherwise, default parameters from the instruments were used, including  
748 refractive index and viscosity. Proteins and buffers were filtered using 0.22- $\mu$ m centrifugal

749 filters right before use to ensure dust was removed from samples. Proteins were mixed  
750 directly, and 10  $\mu$ L were loaded into a quartz microcuvette. Each protein mixture was  
751 repeated multiple times, with each repeat undertaking 20 acquisitions (5 seconds per  
752 acquisition). The cuvette was cleaned by washing three times with filtered MilliQ water,  
753 three times with filtered 95% ethanol, then dried using filtered air. Cutoffs for acceptable  
754 runs were defined as any run with SOS (sum of squares) less than 10.0 and with a baseline  
755 reading between 0.995 and 1.005. Acquisitions exceeding these values were excluded. For  
756 each protein mixture, the readings of all acquisitions from multiple repeats were pooled to  
757 obtain the average molecule radius and compared for statistical significance of differences  
758 using the ANOVA test in the software R.

### 759 *Molecular dynamics simulations*

760 We applied molecular dynamics (MD) simulations and free energies to optimize  
761 Arf1 and WRC binding poses. In total, we simulated 6 binding poses that placed the Arf1  
762 close to the D site. Each MD system consists of one WRC bound to two Rac1 molecules  
763 (PDB: 7USE) (Ding et al., 2022), one Arf1 (PDB: 1J2J), 400  $\text{Cl}^-$  and a certain  $\text{Na}^+$   
764 neutralized the systems, and 231710 water molecules. The proteins and cofactors were  
765 described by AMBER FF14SB (Maier et al., 2015) and GAFF (Wang et al., 2004) force  
766 fields, respectively. MD simulations were performed using a well-established protocol  
767 described elsewhere (Kim et al., 2021; Su et al., 2019; Zhang et al., 2021). Briefly, each  
768 MD system was first relaxed by a series of minimizations followed by four phases of MD  
769 simulations, including the relaxation phase (in total 5 nanoseconds [ns] with 1 femtosecond  
770 [fs] time steps), the system heating-up phase (in total 10 ns), the equilibrium phase (10 ns),  
771 and the final sampling phase (100 ns). The time step was 2 fs for the last three phases, and

772 the MD simulations of the last two phases were performed at 298K and 1 bar to produce  
773 isothermal-isobaric ensembles. All MD simulations were performed using the pmemd.cuda  
774 program in AMBER 18 (Case et al., 2018). Besides the root-mean-square deviation  
775 (r.m.s.d) ~ time curves, a representative MD conformation which has the smallest r.m.s.d.  
776 between itself and the average MD structure was identified for each MD system.

### 777 ***Free energy calculations***

778 140 snapshots from the sampling phase (30 – 100 ns) of a trajectory were collected  
779 for free energy calculations. An internal program was applied to calculate the MM-PBSA-  
780 WSAS free energies of the complex and the binding free energy between Arf1 and WRC.  
781 The polar part of the solvation free energy was calculated using Delphi 95 software (Li et  
782 al., 2012; Rocchia et al., 2001), and the nonpolar part was estimated by scaling the solvent  
783 accessible surface area as described elsewhere (Wang et al., 2019, 2006). The  
784 conformational entropy term was predicted using WSAS, a weighted solvent-accessible  
785 surface area method (Wang and Hou, 2012). The interior and exterior dielectric constants  
786 of PBSA calculations were set to 1.0 and 80.0, respectively. To study the effect of M-site  
787 mutations, we conducted computational mutagenesis using the wildtype snapshots and  
788 calculated the MM-PBSA-WSAS free energies of complex and Arf1 binding.

### 789 ***Cell culture and co-immunoprecipitation***

790 B16-F1-derived *Sral/Cyfip2* KO cells (clone #3) were previously described (Schaks  
791 et al., 2018), and maintained in DMEM (4.5 g/l glucose; Invitrogen) supplemented with 10%  
792 FCS (Gibco), 2 mM glutamine (Thermo Fisher Scientific) and penicillin (50  
793 Units/ml)/streptomycin (50 µg/ml) (Thermo Fisher Scientific). Cells were routinely  
794 transfected in 6 well plates (Sarstedt), using 1 µg DNA in total and 2 µl JetPrime per well.

795 pEGFP-C2-Sra-1 (CYFIP1) and the derived Y967A mutant construct were described  
796 previously (Schaks et al., 2018), and corresponded to the splice variant *CYFIP1a*, sequence  
797 AJ567911, of murine origin. Further point mutations in the M site were introduced by site-  
798 directed mutagenesis. The identity of all DNA constructs was verified by sequencing.

799 For EGFP-immunoprecipitation experiments, B16-F1-derived cell lines ectopically  
800 expressing EGFP-tagged variants of CYFIP1 were lysed with lysis buffer (1% Triton X-100,  
801 140 mM KCl, 50 mM Tris/HCl pH 7.4 supplemented with 50 mM NaF, 10 mM Na<sub>4</sub>P<sub>2</sub>O<sub>7</sub>, 2  
802 mM MgCl<sub>2</sub> and Complete Mini, EDTA-free protease inhibitor [Roche]). Lysates were  
803 cleared and incubated with GFP-Trap agarose beads (Chromotek) for 60 min. Subsequently,  
804 beads were washed three times with lysis buffer lacking protease inhibitor and Triton X-100,  
805 mixed with SDS-PAGE loading buffer, boiled for 5 min, and examined by Western Blotting  
806 using primary antibodies against Sra-1/Cyfp2 (Steffen et al., 2004), Nap1 (Steffen et al.,  
807 2004), WAVE (Schaks et al., 2018) and Abi1 (D3G6C, #39444 Cell Signaling Technology),  
808 as well as corresponding, HRP-conjugated secondary antibodies (Invitrogen).  
809 Chemiluminescence signals were obtained upon incubation with ECL<sup>TM</sup> Prime Western  
810 Blotting Detection Reagent (Cytiva), and recorded with ECL Chemocam imager (Intas,  
811 Goettingen, Germany).

### 812 ***Fluorescence microscopy, phalloidin staining, and quantifications***

813 B16-F1-derived cell lines expressing indicated, EGFP-tagged CYFIP1 constructs or  
814 untransfected control cells were seeded onto laminin-coated (25 µg/ml), 15 mm-diameter  
815 glass coverslips and allowed to adhere for about 24 hours prior to fixation. Cells were fixed  
816 with pre-warmed, 4% paraformaldehyde (PFA) in PBS for 20 min, and permeabilized with  
817 0.05% Triton-X100 in PBS for 30 sec. The actin cytoskeleton was subsequently stained using

818 ATTO-594-conjugated phalloidin (ATTO TEC GmbH, Germany). Samples were mounted  
819 using VectaShield Vibrance antifade reagent and imaged using a 63×/1.4NA Plan  
820 apochromatic oil objective.

821 For assessment of lamellipodia formation, cells were randomly selected and  
822 categorized in a blinded manner as follows: “no lamellipodia” if no phalloidin-stained  
823 peripheral lamellipodia-like actin meshwork was visible, “immature lamellipodia” if the  
824 lamellipodia-like actin meshwork was small, narrow, or displayed multiple ruffles, and  
825 “lamellipodia” if the protrusive actin meshworks appeared to be fully developed (see  
826 representative examples in Figure 6A).

### 827 *Statistical analysis*

828 To assess statistical significance, one-way ANOVA with Dunnett’s post-hoc test was  
829 applied to compare multiple groups with one control group. Statistical analyses were  
830 performed using Prism 6.01. An error probability below 5% ( $p < 0.05$ ; \* in Figure panels)  
831 was considered to imply statistical significance. \*\* and \*\*\* indicated p-values  $\leq 0.01$  and  $\leq$   
832 0.001, respectively.

833

834 **Supplemental information**

835 **Table S1. DNA constructs and WRC assemblies used in this study**

| Name                                | Description                                                                                                                                                                                                | Source/reference      | Identifier            |
|-------------------------------------|------------------------------------------------------------------------------------------------------------------------------------------------------------------------------------------------------------|-----------------------|-----------------------|
| <b>Individual proteins/subunits</b> |                                                                                                                                                                                                            |                       |                       |
| Sra1                                | His6-Tev-hSra1 (1-1253, full length) in pAV5a vector, His6-Tev finally removed                                                                                                                             | (Ismail et al., 2009) | pYS1                  |
| Sra1 <sup>D-Rac1</sup>              | His6-Tev-Sra1-(GGS) <sub>4</sub> -Rac1 <sup>Q61L/P29S</sup> (1-188) in pAV5a vector, His6-Tev finally removed                                                                                              | (Ding et al., 2022)   | pYS11                 |
| Sra1 <sup>A-Rac1</sup>              | His6-Tev-Sra1 Y423-[(GGS) <sub>6</sub> -Rac1 <sup>Q61L/P29S</sup> (1-188)-(GS) <sub>6</sub> ]-S424 (Rac1 is inserted in a loop of Sra1 between Y423/S424), in pAV5a vector, His6-Tev finally removed       | This study            | pYS19                 |
| Sra1 <sup>Y986A, E988A</sup>        | 986A, E988A in Sra1 ( $\Delta$ M#1)                                                                                                                                                                        | This study            | pYS197                |
| Sra1 <sup>Y948A, T951A</sup>        | Y948A, T951A in Sra1 ( $\Delta$ M#2)                                                                                                                                                                       | This study            | pYS198                |
| Sra1 <sup>W845A, Y849A</sup>        | W845A, Y849A in Sra1 ( $\Delta$ M#3)                                                                                                                                                                       | This study            | pYS199                |
| Sra1 <sup>D-PGS</sup>               | His6-Tev-Sra1 H965-(G)-PGS-(G)-G968 (PGS is inserted between H965 and G968, with E966 and Y967 replaced by Gly), in pAV5a vector, His6-Tev finally removed (D-block)                                       | This study            | pYS110                |
| Sra1 <sup>A-PGS</sup>               | His6-Tev-Sra1 K178-(G)-PGS-(G)-S180 (PGS is inserted between K178 and S180, with C179 replaced by Gly. An extra Gly is tethered to C terminus of PGS), in pAV5a vector, His6-Tev finally removed (A-block) | This study            | pYS112                |
| Sra1 <sup>Y967A</sup>               | Y967A in Sra1 ( $\Delta$ D)                                                                                                                                                                                | (Chen et al., 2017)   | cbyd-150807-3 (AT3-1) |
| Sra1 <sup>C179R</sup>               | C179R in Sra1 ( $\Delta$ A)                                                                                                                                                                                | (Chen et al., 2010)   | cbyd-150807-8         |
| Sra1 <sup>C179R, D-Rac1</sup>       | His6-Tev-Sra1 <sup>C179R</sup> -(GGS) <sub>4</sub> -Rac1 <sup>Q61L/P29S</sup> (1-188) in pAV5a vector, His6-Tev finally removed                                                                            | This study            | pYS196                |
| Nap1                                | His6-Tev-hNap1 (1-1128, full length), in pAV5a vector, His6-Tev finally removed                                                                                                                            | (Ismail et al., 2009) | pYS2                  |
| WAVE1 (1-230)                       | MBP-Tev-hWAVE1 (1-230) in pMalC2Tev vector, MBP-Tev finally removed                                                                                                                                        | (Chen et al., 2017)   | pYS8                  |
| WAVE1 (1-230)-WCA                   | MBP-Tev-hWAVE1 (1-230)-(GGS) <sub>6</sub> -WCA(485-559) in pMalC2Tev vector, MBP-Tev finally removed                                                                                                       | (Chen et al., 2017)   | pYS9                  |
| WAVE1(1-230)-Rac1                   | MBP-Tev-WAVE1 (1-230)-(GGS) <sub>6</sub> -Rac1 <sup>Q61L/P29S</sup> (1-188) in pMalC2Tev vector, MBP-Tev finally removed                                                                                   | (Chen et al., 2017)   | cbyd-131103-2 (AE9-2) |
| Abi2 (1-158)                        | MBP-Tev-hAbi2 (1-158) in pMalC2Tev vector, MBP-Tev finally removed                                                                                                                                         | (Ismail et al., 2009) | pYS3                  |
| HSPC300                             | MBP-Tev-hHSPC300 (1-79, full length) in pMalC2Tev vector, MBP-Tev finally removed                                                                                                                          | (Ismail et al., 2009) | pYS4                  |
| WCA                                 | hWAVE1(485-559) in pET11a vector                                                                                                                                                                           | (Ismail et al., 2009) | cbyd-090413-13 (pBC6) |
| GST-Arf1                            | GST-Thrombin-Arf1 <sup><math>\Delta</math>17 (18-181)</sup> in pGEX Thrombin vector                                                                                                                        | This study            | pYS30                 |
| His8-Arf1                           | His8-(GGS) <sub>2</sub> -Arf1 <sup><math>\Delta</math>17 (18-181)</sup> in pET11a vector                                                                                                                   | This study            | pYS186                |
| GST-Arf5                            | GST- Thrombin-Arf5 <sup><math>\Delta</math>17 (18-180)</sup> in pGEX Thrombin vector                                                                                                                       | From Neal Alto        | pYS29                 |
| GST-Arf6                            | GST- Thrombin-Arf6 <sup><math>\Delta</math>13 (14-175)</sup> in pGEX Thrombin vector                                                                                                                       | From Neal Alto        | pYS28                 |
| GST-Arl1                            | GST- Thrombin-Arl1 <sup><math>\Delta</math>17 (18-181)</sup> in pGEX Thrombin vector                                                                                                                       | From Neal Alto        | pYS27                 |
| GST-Arl2                            | GST- Thrombin-Arl2 <sup><math>\Delta</math>13 (14-184)</sup> in pGEX Thrombin vector                                                                                                                       | From Neal Alto        | pYS31                 |

|                                                                         |                                                                                    |                       |                                               |
|-------------------------------------------------------------------------|------------------------------------------------------------------------------------|-----------------------|-----------------------------------------------|
| His6-EspG                                                               | His6-EspG <sup>Δ41</sup> (42-398) in pPROEX HTb vector                             | From Neal Alto        | pYS70                                         |
| GST-Rac1 <sup>QP</sup>                                                  | GST-Tev-Rac1 <sup>Q61L/P29S</sup> (1-188) in pGEXTEv vector                        | (Chen et al., 2017)   | pYS7                                          |
| GST-Rac1 <sup>dead</sup>                                                | Switch I (a.a. 25-39) replaced by (GGG) <sub>5</sub> in GST-Rac1                   | This study            | pYS107                                        |
| Untagged Rac1 <sup>QP</sup>                                             | Rac1 <sup>Q61L/P29S</sup> (1-188) in pET11a vector                                 | (Chen et al., 2017)   | pYS108                                        |
| EGFP-mCyfip1                                                            | EGFP-mCyfip1 in pEGFP vector                                                       | (Schaks et al., 2018) | pMS1                                          |
| EGFP-mCyfip1 <sup>Y967A</sup>                                           | EGFP-mCyfip1 <sup>Y967A</sup> in pEGFP vector (ΔD)                                 | (Schaks et al., 2018) | pMS5                                          |
| EGFP-mCyfip1 <sup>Y986A, E988A</sup>                                    | EGFP-mCyfip1 <sup>Y986A, E988A</sup> in pEGFP vector (ΔM#1)                        | This study            | pMS140                                        |
| EGFP-mCyfip1 <sup>Y948A, T951A</sup>                                    | EGFP-mCyfip1 <sup>Y948A, T951A</sup> in pEGFP vector (ΔM#2)                        | This study            | pMS141                                        |
| EGFP-mCyfip1 <sup>Y967A, Y986A, E988A</sup>                             | EGFP-mCyfip1 <sup>Y967A, Y986A, E988A</sup> in pEGFP vector (ΔD, ΔM#1)             | This study            | pMS156                                        |
| EGFP-mCyfip1 <sup>Y967A, Y948A, T951A</sup>                             | EGFP-mCyfip1 <sup>Y967A, Y948A, T951A</sup> in pEGFP vector (ΔD, ΔM#2)             | This study            | pMS157                                        |
| <b>Assembled WRC (refer to the above table for subunit information)</b> |                                                                                    |                       |                                               |
| WRC <sup>230WCA</sup> , or WRC <sup>apo</sup>                           | Sra1, Nap1, WAVE1 (1-230)-WCA, Abi2 (1-158), and HSPC300                           | (Chen et al., 2017)   | WRC <sup>230WCA</sup> , or WRC <sup>apo</sup> |
| WRC <sup>D-Rac1</sup>                                                   | Sra1 <sup>D-Rac1</sup> , Nap1, WAVE1 (1-230)-WCA, Abi2 (1-158), and HSPC300        | (Ding et al., 2022)   | WRC <sup>D-Rac1</sup>                         |
| WRC <sup>ΔA, D-Rac1</sup>                                               | Sra1 <sup>C179R, D-Rac1</sup> , Nap1, WAVE1 (1-230)-WCA, Abi2 (1-158), and HSPC300 | This study            | WRC <sup>ΔA, D-Rac1</sup>                     |
| WRC <sup>ΔM#1</sup>                                                     | Sra1 <sup>Y986A, E988A</sup> , Nap1, WAVE1 (1-230)-WCA, Abi2 (1-158), and HSPC300  | This study            | WRC <sup>ΔM#1</sup>                           |
| WRC <sup>ΔM#2</sup>                                                     | Sra1 <sup>Y948A, T951A</sup> , Nap1, WAVE1 (1-230)-WCA, Abi2 (1-158), and HSPC300  | This study            | WRC <sup>ΔM#2</sup>                           |
| ΔWRC230                                                                 | Sra1, Nap1, WAVE1 (1-230), Abi2 (1-158), and HSPC300                               | (Chen et al., 2017)   | ΔWRC230                                       |
| ΔWRC230 <sup>D-Rac1</sup>                                               | Sra1 <sup>D-Rac1</sup> , Nap1, WAVE1 (1-230), Abi2 (1-158), and HSPC300            | (Ding et al., 2022)   | ΔWRC230 <sup>D-Rac1</sup>                     |
| ΔWRC230 <sup>A-Rac1</sup>                                               | Sra1 <sup>A-Rac1</sup> , Nap1, WAVE1 (1-230), Abi2 (1-158), and HSPC300            | This study            | ΔWRC230 <sup>A-Rac1</sup>                     |
| ΔWRC230 <sup>ΔWCA-Rac1</sup>                                            | Sra1, Nap1, WAVE1(1-230)-Rac1, Abi2 (1-158), and HSPC300                           | (Chen et al., 2017)   | ΔWRC230 <sup>ΔWCA-Rac1</sup>                  |
| ΔWRC230 <sup>D-block</sup>                                              | Sra1 <sup>D-PGS</sup> , Nap1, WAVE1 (1-230), Abi2 (1-158), and HSPC300             | This study            | ΔWRC230 <sup>D-block</sup>                    |
| ΔWRC230 <sup>A-block</sup>                                              | Sra1 <sup>A-PGS</sup> , Nap1, WAVE1 (1-230), Abi2 (1-158), and HSPC300             | This study            | ΔWRC230 <sup>A-block</sup>                    |
| ΔWRC230 <sup>ΔM#1</sup>                                                 | Sra1 <sup>Y986A, E988A</sup> , Nap1, WAVE1 (1-230)-WCA, Abi2 (1-158), and HSPC300  | This study            | ΔWRC230 <sup>ΔM#1</sup>                       |
| ΔWRC230 <sup>ΔM#2</sup>                                                 | Sra1 <sup>Y948A, T951A</sup> , Nap1, WAVE1 (1-230)-WCA, Abi2 (1-158), and HSPC300  | This study            | ΔWRC230 <sup>ΔM#2</sup>                       |
| ΔWRC230 <sup>ΔM#3</sup>                                                 | Sra1 <sup>W845A, Y849A</sup> , Nap1, WAVE1 (1-230)-WCA, Abi2 (1-158), and HSPC300  | This study            | ΔWRC230 <sup>ΔM#3</sup>                       |

836

837



838 **Table S2. Sequences of recombinant proteins used in this study**

839 Only sequences in the final product (i.e., after protease cleavage to remove the affinity

840 tag) are shown and are annotated by corresponding colors.

841

|                                                                                                                                                                                                                                                                                                                                                                                                                                                                                                                                                                                                                                                                                                                                                                                                                                                                                                                                                                                                                                                                                                                                                                                                                                                                                                                                                                                                                                                                                                                                                                                                                                                                                                                                          |
|------------------------------------------------------------------------------------------------------------------------------------------------------------------------------------------------------------------------------------------------------------------------------------------------------------------------------------------------------------------------------------------------------------------------------------------------------------------------------------------------------------------------------------------------------------------------------------------------------------------------------------------------------------------------------------------------------------------------------------------------------------------------------------------------------------------------------------------------------------------------------------------------------------------------------------------------------------------------------------------------------------------------------------------------------------------------------------------------------------------------------------------------------------------------------------------------------------------------------------------------------------------------------------------------------------------------------------------------------------------------------------------------------------------------------------------------------------------------------------------------------------------------------------------------------------------------------------------------------------------------------------------------------------------------------------------------------------------------------------------|
| <p>&gt;<b>Sra1</b><br/>GAMAAQVTLLEDALSNVDLLEELPLPDQQPCIEPPSSLLYQPNFNTNFEDRNAFVTGIARYIEQATVHSSMNMEEGQE<br/>YAVMLYTWRSRRAIPQVKCNEQPNRVEIYEKTVLEVLEPEVTKLMNFMYFQRNAIERFCGEVRRLCHAERRKDFVSEAY<br/>LITLGKFINMFAVLDLKNMCKSVKNDHSA YKRAAQFLRKMADPQSIQESQNLSMFLANHNKITQSLQQQLEVISGYEEL<br/>LADIVNLCVDYENRMYLTPSEKHMLLKVMGFGLYLMDGSVSNYKLDKAKKRINLSKIDKYFKQLQVVPFLFGDMQIELA<br/>RYIKTSAHYEENKSRWCTSSGSSPQYNICEQMIQIREDHMRFISELAR YSNSEVVTGSGRQEAQKTADEYRKLFDLALQG<br/>LQLLSQWSAHVMEVYSWKL VHPDQKYSNKDCPDSEAEYERATRYNYTSEEKFALEVIAMIKGLQVLMGRMESVFNH<br/>AIRHTVYAALQDFSQVTLREPLRQAIAKKKKNVQSVLQAIKRTVCDWETGHEPFNDPALRGEKDPKSGFDIKVPRRAVGP<br/>SSTQLYMVRTMLES LIADKSGSKKTLRSSLEGPTILDIEKFHRESFFYTHLINFSETLQCCDLSQLWFREFFLELTMGRRIQ<br/>FPIEMSPWILTDHILETKEASMMMEYVLYSLDLYNDSAHYALTRFNKQFLYDEIEAEVNLCFDQFVYKLDQIFAYYK<br/>MAGSLLLDKRLRSECKNQGATIHLPSPNRYETLLKQRHVQLLGRSIDLNRITQRVSAAMYKSLELAIGRFESEDLTSIVEL<br/>DGLLEINRMTHKLLSRYLTLTDGFDAMFREANHNVSAPYGRITLHVFWELNYDFLPNYCYNGSTNRFVVRTVLPFSQEFQR<br/>DKQPNAPQYQLHGSKALNLA YSSYGSYRNFVGPFFHVICRLLGYQGIAVVM EELLKVVKSLLQGTLQYVKTLMMEVM<br/>PKICRLPRHEYGSPGILEFFHHQLKDIVEYAEKLTVCFQNLREVGNAILFCLLIEQSLSEEVCDLLHAAPFQNLPRVHVKE<br/>GERLDAKMKRLESKYAPLHLVPLIERLGTQQIAIAREGDLLTKERLCCGLSMFEVILTRIRSFDDPIWRGPLPSNGVMH<br/>VDECVEFHRLWSAMQFVY CIPVGTHEFTVEQCFDGLHWAGCMIIVLLGQQRRAVLD FCYHLLKVQKHDGKDEIKNV<br/>PLKKMVERIRKFQILNDEIITLDKYLKSGDGEGTPVEHVRCFQPIHQSLASS</p>                                                                                                                                                                                                                                                                                                                                      |
| <p>&gt;<b>Sra1<sup>D-Rac1</sup></b>, or <b>Sra1-(GGS)<sub>4</sub>-Rac1<sup>Q61L/P29S</sup>(1-188)</b><br/>GAMAAQVTLLEDALSNVDLLEELPLPDQQPCIEPPSSLLYQPNFNTNFEDRNAFVTGIARYIEQATVHSSMNMEEGQE<br/>YAVMLYTWRSRRAIPQVKCNEQPNRVEIYEKTVLEVLEPEVTKLMNFMYFQRNAIERFCGEVRRLCHAERRKDFVSEAY<br/>LITLGKFINMFAVLDLKNMCKSVKNDHSA YKRAAQFLRKMADPQSIQESQNLSMFLANHNKITQSLQQQLEVISGYEEL<br/>LADIVNLCVDYENRMYLTPSEKHMLLKVMGFGLYLMDGSVSNYKLDKAKKRINLSKIDKYFKQLQVVPFLFGDMQIELA<br/>RYIKTSAHYEENKSRWCTSSGSSPQYNICEQMIQIREDHMRFISELAR YSNSEVVTGSGRQEAQKTADEYRKLFDLALQG<br/>LQLLSQWSAHVMEVYSWKL VHPDQKYSNKDCPDSEAEYERATRYNYTSEEKFALEVIAMIKGLQVLMGRMESVFNH<br/>AIRHTVYAALQDFSQVTLREPLRQAIAKKKKNVQSVLQAIKRTVCDWETGHEPFNDPALRGEKDPKSGFDIKVPRRAVGP<br/>SSTQLYMVRTMLES LIADKSGSKKTLRSSLEGPTILDIEKFHRESFFYTHLINFSETLQCCDLSQLWFREFFLELTMGRRIQ<br/>FPIEMSPWILTDHILETKEASMMMEYVLYSLDLYNDSAHYALTRFNKQFLYDEIEAEVNLCFDQFVYKLDQIFAYYK<br/>MAGSLLLDKRLRSECKNQGATIHLPSPNRYETLLKQRHVQLLGRSIDLNRITQRVSAAMYKSLELAIGRFESEDLTSIVEL<br/>DGLLEINRMTHKLLSRYLTLTDGFDAMFREANHNVSAPYGRITLHVFWELNYDFLPNYCYNGSTNRFVVRTVLPFSQEFQR<br/>DKQPNAPQYQLHGSKALNLA YSSYGSYRNFVGPFFHVICRLLGYQGIAVVM EELLKVVKSLLQGTLQYVKTLMMEVM<br/>PKICRLPRHEYGSPGILEFFHHQLKDIVEYAEKLTVCFQNLREVGNAILFCLLIEQSLSEEVCDLLHAAPFQNLPRVHVKE<br/>GERLDAKMKRLESKYAPLHLVPLIERLGTQQIAIAREGDLLTKERLCCGLSMFEVILTRIRSFDDPIWRGPLPSNGVMH<br/>VDECVEFHRLWSAMQFVY CIPVGTHEFTVEQCFDGLHWAGCMIIVLLGQQRRAVLD FCYHLLKVQKHDGKDEIKNV<br/>PLKKMVERIRKFQILNDEIITLDKYLKSGDGEGTPVEHVRCFQPIHQSLASS <b>GGSGSGSGSGSMQAICV VVGDGAV</b><br/><b>GKTCLLISYTTNAFSGEYIPTVFDNY SANVMVDGKPVNGLWDTAGLEDYDRLRPLSYPTDVF LICFSLVSPASFENVR</b><br/><b>AKWYPEVRHHCNPTPIILVGTKLDLRDDKDTIEKLEKKTLPITYPQGLAMAKEIGAVKYLECSALTQRGLKTVFDEAIR</b><br/><b>AVLCPVPVKRRKRK</b></p> |
| <p>&gt;<b>Sra1<sup>A-Rac1</sup></b> or <b>Sra1 Y423-[(GGS)<sub>6</sub>-Rac1<sup>Q61L/P29S</sup>(1-188)-(GS)<sub>6</sub>]-S424</b><br/>GAMAAQVTLLEDALSNVDLLEELPLPDQQPCIEPPSSLLYQPNFNTNFEDRNAFVTGIARYIEQATVHSSMNMEEGQE<br/>YAVMLYTWRSRRAIPQVKCNEQPNRVEIYEKTVLEVLEPEVTKLMNFMYFQRNAIERFCGEVRRLCHAERRKDFVSEAY<br/>LITLGKFINMFAVLDLKNMCKSVKNDHSA YKRAAQFLRKMADPQSIQESQNLSMFLANHNKITQSLQQQLEVISGYEEL<br/>LADIVNLCVDYENRMYLTPSEKHMLLKVMGFGLYLMDGSVSNYKLDKAKKRINLSKIDKYFKQLQVVPFLFGDMQIELA<br/>RYIKTSAHYEENKSRWCTSSGSSPQYNICEQMIQIREDHMRFISELAR YSNSEVVTGSGRQEAQKTADEYRKLFDLALQG<br/>LQLLSQWSAHVMEVYSWKL VHPDQKYSNKDCPDSEAEYERATRYNYTSEEKFALEVIAMIKGLQVLMGRMESVFNH<br/>AIRHTVYAALQDFSQVTLREPLRQAIAKKKKNVQSVLQAIKRTVCDWETGHEPFNDPALRGEKDPKSGFDIKVPRRAVGP<br/>SSTQLYMVRTMLES LIADKSGSKKTLRSSLEGPTILDIEKFHRESFFYTHLINFSETLQCCDLSQLWFREFFLELTMGRRIQ<br/>FPIEMSPWILTDHILETKEASMMMEYVLYSLDLYNDSAHYALTRFNKQFLYDEIEAEVNLCFDQFVYKLDQIFAYYK<br/>MAGSLLLDKRLRSECKNQGATIHLPSPNRYETLLKQRHVQLLGRSIDLNRITQRVSAAMYKSLELAIGRFESEDLTSIVEL<br/>DGLLEINRMTHKLLSRYLTLTDGFDAMFREANHNVSAPYGRITLHVFWELNYDFLPNYCYNGSTNRFVVRTVLPFSQEFQR<br/>DKQPNAPQYQLHGSKALNLA YSSYGSYRNFVGPFFHVICRLLGYQGIAVVM EELLKVVKSLLQGTLQYVKTLMMEVM<br/>PKICRLPRHEYGSPGILEFFHHQLKDIVEYAEKLTVCFQNLREVGNAILFCLLIEQSLSEEVCDLLHAAPFQNLPRVHVKE<br/>GERLDAKMKRLESKYAPLHLVPLIERLGTQQIAIAREGDLLTKERLCCGLSMFEVILTRIRSFDDPIWRGPLPSNGVMH<br/>VDECVEFHRLWSAMQFVY CIPVGTHEFTVEQCFDGLHWAGCMIIVLLGQQRRAVLD FCYHLLKVQKHDGKDEIKNV<br/>PLKKMVERIRKFQILNDEIITLDKYLKSGDGEGTPVEHVRCFQPIHQSLASS</p>                                                                                                                                                                                                                       |

|                                                                                                                                                                                                                                                                                                                                                                                                                                                                                                                                                                                                                                                                                                                                                                                                                                                                                                                                                                                                                                                                                                                                                                                                                                                                                                                                                                                                                                                  |
|--------------------------------------------------------------------------------------------------------------------------------------------------------------------------------------------------------------------------------------------------------------------------------------------------------------------------------------------------------------------------------------------------------------------------------------------------------------------------------------------------------------------------------------------------------------------------------------------------------------------------------------------------------------------------------------------------------------------------------------------------------------------------------------------------------------------------------------------------------------------------------------------------------------------------------------------------------------------------------------------------------------------------------------------------------------------------------------------------------------------------------------------------------------------------------------------------------------------------------------------------------------------------------------------------------------------------------------------------------------------------------------------------------------------------------------------------|
| <p>&gt; Sra1<sup>Y986A, E988A</sup><br/>GAMAAQVTLLEDALSNVDLLEELPLPDQQPCIEPPSSLLYQPNFNTNFEDRNAFVTGIARYIEQATVHSSMNEMLEEGQE<br/>YAVMLYTWRSCSRAIPQVKCNEQPNRVEIYEKTVLEVLEPEVTKLMNFMFYQORNAIERFCGEVRRLLCHAERRKDFVSEAY<br/>LITLGKFINMFAVLDELKNMKCSVKNDHSA YKRAAQFLRKMADPQSIQESQNLSMFLANHNKITQSLQQQLEVISGYEEL<br/>LADIVNLCVDYENRMYLTPSEKHMLLKVMGFGLYLMDGSVSNYKLD AKKRINLSKIDKYFKQLQVVPFLFGDMQIELA<br/>RYIKTSAHYEENKSRWCTCTSSGSSPQYNICEQMIQIREDHMRFISELARYSNSEVVTGSGRQEAQKTD AEYRKLFDLALQG<br/>LQLLSQWSAHVMEVYSWKL VHPPTDKYSNKDCPD SAEEYERATRYNYTSEEK FALVEVIAMIKGLQVLMGRMESVFNH<br/>AIRHTVY AALQDFSQVTLREPLRQA IKKKKNV IQSVLQAIKRTVCDWETGHEPFNDPALRGEKDPKSGFDIKVPRRAVGP<br/>SSTQLYMVRTMLES LIADKSGSKKTLRSSLEGPTILDIEKFHRESFFYTHLINFSETLQCCDLSQLWFREFFLELTMGRRIQ<br/>FPIEMSPWILTDHILETKEASMM EYVLYSLDLYNDSAHYALTRFNKQFLYDEIEAEVNLCFDQFVYK LADQIFAYYKV<br/>MAGSLLLDKRLRSECKNQGATIHLPPSNRYETLLKQRHVQLLGRSIDLNRITQRVSAAMYKSLELAIGRFESDLTSIVEL<br/>DGLLEINRMTHKLLSRYL TLDGFDAMFREANHNVSAPYGRITLHVFWELNYDFLPNYCYNGSTNRFVRTVLPFSQEFQR<br/>DKQNAQPQYLHGSKALNLA YSSYGSYRNFVGP PPHFQVICRLLGYQGIAVVM EELLKVVKSLLQGTILQYVKTLM EVM<br/>PKICRLPRHEYGSPGILEFFHHQLKDIVEA AALKTVCFQNLREVGNAILFCLLIEQSLSEEVCDLLHAAPFQNILPRVHVKE<br/>GERLDAKMKRLESKYAPLHLVPLIERL GTPQQAIAAREGDL LTKERLCCGLSMFEVILTRIRSFLDDPIWRGPLPSNGVMH<br/>VDECFEFHRLWSAMQFVY CIPVGTHEFTVEQCFDGLHWAGCMIIVLLGQQRRAVLD FCYHLLKVKQKHDGKDEIKNV<br/>PLKKMVERIRKFQILNDEIITLDKYLKSGDGEGT PVEHVRCFQPIHQSLASS</p>  |
| <p>&gt; Sra1<sup>Y948A, T951A</sup><br/>GAMAAQVTLLEDALSNVDLLEELPLPDQQPCIEPPSSLLYQPNFNTNFEDRNAFVTGIARYIEQATVHSSMNEMLEEGQE<br/>YAVMLYTWRSCSRAIPQVKCNEQPNRVEIYEKTVLEVLEPEVTKLMNFMFYQORNAIERFCGEVRRLLCHAERRKDFVSEAY<br/>LITLGKFINMFAVLDELKNMKCSVKNDHSA YKRAAQFLRKMADPQSIQESQNLSMFLANHNKITQSLQQQLEVISGYEEL<br/>LADIVNLCVDYENRMYLTPSEKHMLLKVMGFGLYLMDGSVSNYKLD AKKRINLSKIDKYFKQLQVVPFLFGDMQIELA<br/>RYIKTSAHYEENKSRWCTCTSSGSSPQYNICEQMIQIREDHMRFISELARYSNSEVVTGSGRQEAQKTD AEYRKLFDLALQG<br/>LQLLSQWSAHVMEVYSWKL VHPPTDKYSNKDCPD SAEEYERATRYNYTSEEK FALVEVIAMIKGLQVLMGRMESVFNH<br/>AIRHTVY AALQDFSQVTLREPLRQA IKKKKNV IQSVLQAIKRTVCDWETGHEPFNDPALRGEKDPKSGFDIKVPRRAVGP<br/>SSTQLYMVRTMLES LIADKSGSKKTLRSSLEGPTILDIEKFHRESFFYTHLINFSETLQCCDLSQLWFREFFLELTMGRRIQ<br/>FPIEMSPWILTDHILETKEASMM EYVLYSLDLYNDSAHYALTRFNKQFLYDEIEAEVNLCFDQFVYK LADQIFAYYKV<br/>MAGSLLLDKRLRSECKNQGATIHLPPSNRYETLLKQRHVQLLGRSIDLNRITQRVSAAMYKSLELAIGRFESDLTSIVEL<br/>DGLLEINRMTHKLLSRYL TLDGFDAMFREANHNVSAPYGRITLHVFWELNYDFLPNYCYNGSTNRFVRTVLPFSQEFQR<br/>DKQNAQPQYLHGSKALNLA YSSYGSYRNFVGP PPHFQVICRLLGYQGIAVVM EELLKVVKSLLQGTILQAVKALMEVM<br/>PKICRLPRHEYGSPGILEFFHHQLKDIVEY AELKTVCFQNLREVGNAILFCLLIEQSLSEEVCDLLHAAPFQNILPRVHVKE<br/>GERLDAKMKRLESKYAPLHLVPLIERL GTPQQAIAAREGDL LTKERLCCGLSMFEVILTRIRSFLDDPIWRGPLPSNGVMH<br/>VDECFEFHRLWSAMQFVY CIPVGTHEFTVEQCFDGLHWAGCMIIVLLGQQRRAVLD FCYHLLKVKQKHDGKDEIKNV<br/>PLKKMVERIRKFQILNDEIITLDKYLKSGDGEGT PVEHVRCFQPIHQSLASS</p>   |
| <p>&gt; Sra1<sup>W845A, Y849A</sup><br/>GAMAAQVTLLEDALSNVDLLEELPLPDQQPCIEPPSSLLYQPNFNTNFEDRNAFVTGIARYIEQATVHSSMNEMLEEGQE<br/>YAVMLYTWRSCSRAIPQVKCNEQPNRVEIYEKTVLEVLEPEVTKLMNFMFYQORNAIERFCGEVRRLLCHAERRKDFVSEAY<br/>LITLGKFINMFAVLDELKNMKCSVKNDHSA YKRAAQFLRKMADPQSIQESQNLSMFLANHNKITQSLQQQLEVISGYEEL<br/>LADIVNLCVDYENRMYLTPSEKHMLLKVMGFGLYLMDGSVSNYKLD AKKRINLSKIDKYFKQLQVVPFLFGDMQIELA<br/>RYIKTSAHYEENKSRWCTCTSSGSSPQYNICEQMIQIREDHMRFISELARYSNSEVVTGSGRQEAQKTD AEYRKLFDLALQG<br/>LQLLSQWSAHVMEVYSWKL VHPPTDKYSNKDCPD SAEEYERATRYNYTSEEK FALVEVIAMIKGLQVLMGRMESVFNH<br/>AIRHTVY AALQDFSQVTLREPLRQA IKKKKNV IQSVLQAIKRTVCDWETGHEPFNDPALRGEKDPKSGFDIKVPRRAVGP<br/>SSTQLYMVRTMLES LIADKSGSKKTLRSSLEGPTILDIEKFHRESFFYTHLINFSETLQCCDLSQLWFREFFLELTMGRRIQ<br/>FPIEMSPWILTDHILETKEASMM EYVLYSLDLYNDSAHYALTRFNKQFLYDEIEAEVNLCFDQFVYK LADQIFAYYKV<br/>MAGSLLLDKRLRSECKNQGATIHLPPSNRYETLLKQRHVQLLGRSIDLNRITQRVSAAMYKSLELAIGRFESDLTSIVEL<br/>DGLLEINRMTHKLLSRYL TLDGFDAMFREANHNVSAPYGRITLHVFAELNADFLPNYCYNGSTNRFVRTVLPFSQEFQRD<br/>KQPNAPQY LHGSKALNLA YSSYGSYRNFVGP PPHFQVICRLLGYQGIAVVM EELLKVVKSLLQGTILQYVKTLM EVM<br/>PKICRLPRHEYGSPGILEFFHHQLKDIVEY AELKTVCFQNLREVGNAILFCLLIEQSLSEEVCDLLHAAPFQNILPRVHVKE<br/>GERLDAKMKRLESKYAPLHLVPLIERL GTPQQAIAAREGDL LTKERLCCGLSMFEVILTRIRSFLDDPIWRGPLPSNGVMH<br/>VDECFEFHRLWSAMQFVY CIPVGTHEFTVEQCFDGLHWAGCMIIVLLGQQRRAVLD FCYHLLKVKQKHDGKDEIKNV<br/>PLKKMVERIRKFQILNDEIITLDKYLKSGDGEGT PVEHVRCFQPIHQSLASS</p> |
| <p>&gt;Sra1<sup>D-PGS</sup> or Sra1 H965-(G)-PGS-(G)-G968<br/>GAMAAQVTLLEDALSNVDLLEELPLPDQQPCIEPPSSLLYQPNFNTNFEDRNAFVTGIARYIEQATVHSSMNEMLEEGQE<br/>YAVMLYTWRSCSRAIPQVKCNEQPNRVEIYEKTVLEVLEPEVTKLMNFMFYQORNAIERFCGEVRRLLCHAERRKDFVSEAY<br/>LITLGKFINMFAVLDELKNMKCSVKNDHSA YKRAAQFLRKMADPQSIQESQNLSMFLANHNKITQSLQQQLEVISGYEEL<br/>LADIVNLCVDYENRMYLTPSEKHMLLKVMGFGLYLMDGSVSNYKLD AKKRINLSKIDKYFKQLQVVPFLFGDMQIELA<br/>RYIKTSAHYEENKSRWCTCTSSGSSPQYNICEQMIQIREDHMRFISELARYSNSEVVTGSGRQEAQKTD AEYRKLFDLALQG<br/>LQLLSQWSAHVMEVYSWKL VHPPTDKYSNKDCPD SAEEYERATRYNYTSEEK FALVEVIAMIKGLQVLMGRMESVFNH<br/>AIRHTVY AALQDFSQVTLREPLRQA IKKKKNV IQSVLQAIKRTVCDWETGHEPFNDPALRGEKDPKSGFDIKVPRRAVGP<br/>SSTQLYMVRTMLES LIADKSGSKKTLRSSLEGPTILDIEKFHRESFFYTHLINFSETLQCCDLSQLWFREFFLELTMGRRIQ<br/>FPIEMSPWILTDHILETKEASMM EYVLYSLDLYNDSAHYALTRFNKQFLYDEIEAEVNLCFDQFVYK LADQIFAYYKV<br/>MAGSLLLDKRLRSECKNQGATIHLPPSNRYETLLKQRHVQLLGRSIDLNRITQRVSAAMYKSLELAIGRFESDLTSIVEL<br/>DGLLEINRMTHKLLSRYL TLDGFDAMFREANHNVSAPYGRITLHVFWELNYDFLPNYCYNGSTNRFVRTVLPFSQEFQR<br/>DKQNAQPQYLHGSKALNLA YSSYGSYRNFVGP PPHFQVICRLLGYQGIAVVM EELLKVVKSLLQGTILQYVKTLM EVM<br/>PKICRLPRHGGIDCSFWNESYLTGSRDERKKSLLSKFGMDEGVTFMFIGRFRDQKGV DVLKAI EILSSKKEFQEMRFIII<br/>GKGDPELEGWARSLEKHGNV K VITEMLSREFVRELYGSVD FVIPS YFEPFGLVALEAMCLGAIPASAVGGLRDIITNET<br/>GILVKAGDPGELANAILKALELSRDL SKFRENCKKRAMSFSGGSPGILEFFHHQLKDIVEY AELKTVCFQNLREVGNAIL</p>                                    |

FCLLIEQSLSLEEVCDLLHAAPFQNILPRVHVKEGERLDAKMKRLESKYAPLHLVPLIERLGTQQIAIAREGDLLTKERLC  
CGLSMFEVILTRIRSFLDDPIWRGPLPSNGVMHVDECVEFHRLWSAMQFVYIPVGTHEFTVEQCFDGLHWAGCMIIVL  
LGQRRFAVLDFCYHLLKVQKHDGKDEIKNVPLKKMVERIRKFQILNDEIITLTDKYLKSGDGEGTPVEHVRCFQPIHQ  
LASS

>Sra1<sup>A-PGS</sup> or K178-(G)-PGS-(G)-S180  
GAMAAQVTLEDALSNVDLLEELPLPDQQPCIEPPSSLLYQPNFNTNFEDRNAFVTGIARYIEQATVHSSMNEMLEEGQE  
YAVMLYTWRSRAIPQVKCNEQPNRVEIYEKTEVEVLEPEVTKLMNFMFYQRNAIERFCGEVRRLCHAERRKDFVSEAY  
LITLGFKNMFAVLDELKNMKGGIDCSFWNESYLTGSRDERKKSLLSKFGMDEGVTFMFIGRFRDQKQGVVLLKAIIEIL  
SSKKEFQEMRFIIIGKGDPELEGWARSLEEKHGNVVKVITEMLSREVFVRELYGSVDFVIIPSYFEPFGLVALEAMCLGAIPIAS  
AVGGRLDIITNETGILVKAGDPGELANAILKALELSRSDLSKRFRECKKRAMSFSGSVKNDHSAYKRAAQFLRKMADPQS  
IQESQNLMSFLANHNKITQSLQQLEVISGYEELLADIVNLCVDYENRMYLTPSEKHMLLKVMGFGLYLMDGVSNIY  
KLDACKRINLSKIDKYFKQLQVVPFLFGDMQIELARYIKTSAHYEENKSRWCTSSGSSPQYNICEQMIQIREDHMRFISEL  
ARYSNSEVVTGSGRQEAQKTDAYRKLFDLALQGLQLSQWSAHVMEVYSWKL VHPTDKYSNKDCPDSAEEYERATR  
YNYTSEEKFALEVIAMIKGLQVLMGRMESVFNHAIHRTVYAAALQDFSQVTLREPLRQAIAIKKKKNVQSVLQAIKRTVCD  
WETGHEPFNDPALRGEKDPKSGFDIKVPRRAVGPSTQLYMVRTMLESIAADKSGSKTLRSSLLEGPTILDIEKFHRESFFY  
THLINFSETLQCCDLSQLWFREFFLELTMGRRIQFPIEMSMPWILTDHILETKEASMMYVLYSLDLYNDSAHYALTRFN  
KQFLYDEIEAEVNLCFDQFVYKLDQIFAYYKVMAGSLLDKRLRSECKNQGATIHLPNSRYETLLKQRHVQLLGRSID  
LNRLITQRVSAAMYKSLELAIGRFESEDLSIVELDGLLEINRMTHKLLSRYLTLTDGFDAMFREANHNVSAPYGRITLHV  
WELNYDFLPNYCYNGSTNRVVRTVLPFSQEFQRDKQPNAPQYQLHGSKALNLA YSSYGSYRNFVGPFFHQVICRLLGYQ  
GIAVVM EELLKVVKSLQGTILQYVKTLMVMPKICRLPRAHYEENKSRWCTSSGSSPQYNICEQMIQIREDHMRFISEL  
FCLLIEQSLSLEEVCDLLHAAPFQNILPRVHVKEGERLDAKMKRLESKYAPLHLVPLIERLGTQQIAIAREGDLLTKERLC  
CGLSMFEVILTRIRSFLDDPIWRGPLPSNGVMHVDECVEFHRLWSAMQFVYIPVGTHEFTVEQCFDGLHWAGCMIIVL  
LGQRRFAVLDFCYHLLKVQKHDGKDEIKNVPLKKMVERIRKFQILNDEIITLTDKYLKSGDGEGTPVEHVRCFQPIHQ  
LASS

>Sra1<sup>Y967A</sup>  
GAMAAQVTLEDALSNVDLLEELPLPDQQPCIEPPSSLLYQPNFNTNFEDRNAFVTGIARYIEQATVHSSMNEMLEEGQE  
YAVMLYTWRSRAIPQVKCNEQPNRVEIYEKTEVEVLEPEVTKLMNFMFYQRNAIERFCGEVRRLCHAERRKDFVSEAY  
LITLGFKNMFAVLDELKNMKCSVKNDHSAYKRAAQFLRKMADPQSIQESQNLMSFLANHNKITQSLQQLEVISGYEEL  
LADIVNLCVDYENRMYLTPSEKHMLLKVMGFGLYLMDGVSNIYKLDACKRINLSKIDKYFKQLQVVPFLFGDMQIELA  
RYIKTSAHYEENKSRWCTSSGSSPQYNICEQMIQIREDHMRFISELARYSNSEVVTGSGRQEAQKTDAYRKLFDLALQ  
LQLSQWSAHVMEVYSWKL VHPTDKYSNKDCPDSAEEYERATRYNYTSEEKFALEVIAMIKGLQVLMGRMESVFNH  
AIRHTVYAAALQDFSQVTLREPLRQAIAIKKKKNVQSVLQAIKRTVCDWETGHEPFNDPALRGEKDPKSGFDIKVPRRAV  
SSTQLYMVRTMLESIAADKSGSKTLRSSLLEGPTILDIEKFHRESFFYTHLINFSETLQCCDLSQLWFREFFLELTMGRRIQ  
FPIEMSMPWILTDHILETKEASMMYVLYSLDLYNDSAHYALTRFNKQFLYDEIEAEVNLCFDQFVYKLDQIFAYYK  
MAGSLLDKRLRSECKNQGATIHLPNSRYETLLKQRHVQLLGRSIDLNRLITQRVSAAMYKSLELAIGRFESEDLSIVEL  
DGLLEINRMTHKLLSRYLTLTDGFDAMFREANHNVSAPYGRITLHVWELNYDFLPNYCYNGSTNRVVRTVLPFSQEFQ  
DKQPNAPQYQLHGSKALNLA YSSYGSYRNFVGPFFHQVICRLLGYQGIADVMEELLKVVKSLQGTILQYVKTLMV  
PKICRLPRHEAGSPGILEFFHHQLKDIVEYAEKLTVCFQNLREVGNAILFCLLIEQSLSLEEVCDLLHAAPFQNILPRVHV  
GERLDAKMKRLESKYAPLHLVPLIERLGTQQIAIAREGDLLTKERLCCGLSMFEVILTRIRSFLDDPIWRGPLPSNGVMH  
VDECVEFHRLWSAMQFVYIPVGTHEFTVEQCFDGLHWAGCMIIVLLGQRRFAVLDFCYHLLKVQKHDGKDEIKNV  
PLKKMVERIRKFQILNDEIITLTDKYLKSGDGEGTPVEHVRCFQPIHQSLASS

>Sra1<sup>C179R</sup>  
GAMAAQVTLEDALSNVDLLEELPLPDQQPCIEPPSSLLYQPNFNTNFEDRNAFVTGIARYIEQATVHSSMNEMLEEGQE  
YAVMLYTWRSRAIPQVKCNEQPNRVEIYEKTEVEVLEPEVTKLMNFMFYQRNAIERFCGEVRRLCHAERRKDFVSEAY  
LITLGFKNMFAVLDELKNMKRSVKNDHSAYKRAAQFLRKMADPQSIQESQNLMSFLANHNKITQSLQQLEVISGYEEL  
LADIVNLCVDYENRMYLTPSEKHMLLKVMGFGLYLMDGVSNIYKLDACKRINLSKIDKYFKQLQVVPFLFGDMQIELA  
RYIKTSAHYEENKSRWCTSSGSSPQYNICEQMIQIREDHMRFISELARYSNSEVVTGSGRQEAQKTDAYRKLFDLALQ  
LQLSQWSAHVMEVYSWKL VHPTDKYSNKDCPDSAEEYERATRYNYTSEEKFALEVIAMIKGLQVLMGRMESVFNH  
AIRHTVYAAALQDFSQVTLREPLRQAIAIKKKKNVQSVLQAIKRTVCDWETGHEPFNDPALRGEKDPKSGFDIKVPRRAV  
SSTQLYMVRTMLESIAADKSGSKTLRSSLLEGPTILDIEKFHRESFFYTHLINFSETLQCCDLSQLWFREFFLELTMGRRIQ  
FPIEMSMPWILTDHILETKEASMMYVLYSLDLYNDSAHYALTRFNKQFLYDEIEAEVNLCFDQFVYKLDQIFAYYK  
MAGSLLDKRLRSECKNQGATIHLPNSRYETLLKQRHVQLLGRSIDLNRLITQRVSAAMYKSLELAIGRFESEDLSIVEL  
DGLLEINRMTHKLLSRYLTLTDGFDAMFREANHNVSAPYGRITLHVWELNYDFLPNYCYNGSTNRVVRTVLPFSQEFQ  
DKQPNAPQYQLHGSKALNLA YSSYGSYRNFVGPFFHQVICRLLGYQGIADVMEELLKVVKSLQGTILQYVKTLMV  
PKICRLPRHEYAGSPGILEFFHHQLKDIVEYAEKLTVCFQNLREVGNAILFCLLIEQSLSLEEVCDLLHAAPFQNILPRVHV  
GERLDAKMKRLESKYAPLHLVPLIERLGTQQIAIAREGDLLTKERLCCGLSMFEVILTRIRSFLDDPIWRGPLPSNGVMH  
VDECVEFHRLWSAMQFVYIPVGTHEFTVEQCFDGLHWAGCMIIVLLGQRRFAVLDFCYHLLKVQKHDGKDEIKNV  
PLKKMVERIRKFQILNDEIITLTDKYLKSGDGEGTPVEHVRCFQPIHQSLASS

>Sra1<sup>C179R, D-Rac1</sup>, or Sra1<sup>C179R</sup>-(GGG)-Rac1<sup>Q61L/P29S</sup>(I-188)  
GAMAAQVTLEDALSNVDLLEELPLPDQQPCIEPPSSLLYQPNFNTNFEDRNAFVTGIARYIEQATVHSSMNEMLEEGQE  
YAVMLYTWRSRAIPQVKCNEQPNRVEIYEKTEVEVLEPEVTKLMNFMFYQRNAIERFCGEVRRLCHAERRKDFVSEAY  
LITLGFKNMFAVLDELKNMKRSVKNDHSAYKRAAQFLRKMADPQSIQESQNLMSFLANHNKITQSLQQLEVISGYEEL  
LADIVNLCVDYENRMYLTPSEKHMLLKVMGFGLYLMDGVSNIYKLDACKRINLSKIDKYFKQLQVVPFLFGDMQIELA  
RYIKTSAHYEENKSRWCTSSGSSPQYNICEQMIQIREDHMRFISELARYSNSEVVTGSGRQEAQKTDAYRKLFDLALQ  
LQLSQWSAHVMEVYSWKL VHPTDKYSNKDCPDSAEEYERATRYNYTSEEKFALEVIAMIKGLQVLMGRMESVFNH  
AIRHTVYAAALQDFSQVTLREPLRQAIAIKKKKNVQSVLQAIKRTVCDWETGHEPFNDPALRGEKDPKSGFDIKVPRRAVGP

|                                                                                                                                                                                                                                                                                                                                                                                                                                                                                                                                                                                                                                                                                                                                                                                                                                                                                                                                                                                                                                                                                                                                                                                                                                                                         |
|-------------------------------------------------------------------------------------------------------------------------------------------------------------------------------------------------------------------------------------------------------------------------------------------------------------------------------------------------------------------------------------------------------------------------------------------------------------------------------------------------------------------------------------------------------------------------------------------------------------------------------------------------------------------------------------------------------------------------------------------------------------------------------------------------------------------------------------------------------------------------------------------------------------------------------------------------------------------------------------------------------------------------------------------------------------------------------------------------------------------------------------------------------------------------------------------------------------------------------------------------------------------------|
| <p>SSTQLYMVRTMLES LIADKSGSKKTLRSSLEGPTILDIEKFHRESFFYTHLINFSETLQQCCDLSQLWFREFFLELTMGRRIQ<br/>FPIEMSPWILTDHILETKEASMMMEYVLYSLDLYNDSAHYALTRFNKQFLYDEIEAEVNLCFDQFVYKLDQIFAYYKV<br/>MAGSLLLDKRLRSECKNQGATIHLPSPNRYETLLKQRHVQLGRSIDLNRITQRVSAAMYKSLELAIGRFESDLTSIVEL<br/>DGLLEINRMT HKLLSRYLTDGDFDAMFREANHNVSAPYGRITLHVFWELNYDFLPNYCYNGSTNRFRVTVL PFSQEFQR<br/>DKQPNAPQPYLHGSKALNLA YSSYGSYRNFVGP PHFQVICRLLGYQGIAVVM EELLKVVKSLLQGTILQYVKTLM EVM<br/>PKICRLPRHEYGSPGILEFFHHQLKDIVEY AELKTVCFQNLREVGNAILFCLLIEQSLSEEVCDLLHAAPFQNILPRVHVKE<br/>GERLDAKMKRLESKYAPLHLVPLIERLGTQQIAIAREGDLLTKERLCCGLSMFEVILTRIRSFLDDPPIWRGPLSPNGVMH<br/>VDECVEFHRLWSAMQFVY CIPVGTHEFTVEQCFGDGLHWAGCMIVLLGQQRFAVLDFCYHLLKVKQKHDGKDEIKNV<br/>PLKKMVERIRKFQILNDEIITLDKYLKSGDGEGTPEVHVRCFQPIHQSLASSGGSGSGSGSGSMQAICVVG DGAV<br/>GKTCLLISYTTNAFSGEYIPTVFDNYSANVMVDGKPVNLGLWDTAGLEDYDRLRPLSYPQTDVFLICFSLVSPASFENVR<br/>AKWYPEVRHHCNTPILVGT KLDLDRDDKDTIEKLEKELKTPITYPQGLAMAKEIGAVKYLECSALTQRGLKTVFDEAIR<br/>AVLCPPPVKRRKRK</p>                                                                                                                                                                                                                                                                          |
| <p><b>&gt;Nap1</b><br/>GAMRSVLQPSQKLA EKLTLNDRGVGMLTRLYNIKKACGDPKAKPSYLIDKNLES AVKFIVRKFPVETRNNNQLA<br/>QLQEKSEILKNLALYYFTVDVMEFKD HVCCELLNTIDVCQVFFDITVNFDLTKNYLDLIITYTTLMLLSRIERKAIIGLY<br/>NYAHEMTHGASDREYPRLGQMIVDYENPLKMMEEFVPHSKSLSDALISLQM VYPRRNL S ADQWRNAQLLSLISAPSTM<br/>LNPAQSDTMPCEYLSLDAMEKWIIFGFILCHGILNTDATALNLWKLALQSSCSLFRDEVFHHKAAEDLFVNIRGYNKR<br/>INDIRECKEAAVSHAGSMHREERRKFLRSALKELATVLS DQPGLLGPKALFVFMALSFARDEI IWLLRHADNMPKKSADDF<br/>IDKHIAELIFYMEELRAHVRYGPVMQRYYVQYLSGFDVAVLNELVQNL SVCPEDESIIMSSVFNTMTSLSVKQVEDGEV<br/>FDFRGMRLDWFR LQAYTSVSKASLGLADHRELGM MNTIIFHTKMVDSLVEMLVETS DLSIFCFYSRAFEKMFQCCLEL<br/>PSQRSYIAFP LCTHFMSC THELCP EERHHIGDRSLSLCNMFLDEMAKQARNLITDICTEQCTLS DQLLPKHCAKTISQAV<br/>NKKSKKQTGKKGEPERKPGVESMRKNRLVVTNLDKLHTALSELCSINYPNMV VWEHTFTPREYLTSHLEIRFTKSIV<br/>GMTMYNQATQEI AKPSELLTSVRAYMTVLQSIENYVQIDITRVFN NVLLQQTQHLD SHGEP TITSLYTNWYLETLLRQVS<br/>NGHIAFYFAMKAFVNLPTENELTFNAEEYSDISEMRSLELLGPGYGMKFLSESLMWHISSQVAELKLVENVDVLTQM<br/>RTSFDKPDQMAALFKRLSSVDSVLKRMTHIGVILSFRSLAQEALRDVLSYHIPFLVSSIEDFKDHI PRETDMKVAMNVYELS<br/>SAAGLPCEIDPALVVALSSQKSENISPEEYKIA CLLMVFAVSLPTLASNVMSQYSPAIEGHCNNIHLAKAINQIAAALF<br/>TIHKGSIEDRLKEFLALASSLLKIGQETDKTTRNRRESVYLLDMIVQESPLTMDLLESCFPYLLRNAYHAVYKQSVTS<br/>SA</p> |
| <p><b>&gt;WAVE1 (1-230)</b><br/>GHMPLVKNRNDPRHLCHTALPRGIKNELEC VTNISLANIIRQLSSLSKYAEDIFGELFNEAHSFSFRVNSLQERVDRLSVSVT<br/>QLDPKEEELS QDITMRKAFRSTIQDQQLFDRKTLPIPLQETYDVCEQPPPLNILTPYRDDGKEGLKFYTNPSYFFDLWKE<br/>KMLQDTEDEK RKEKRKQKQKNLDRPHEPEK VPRAPHDRRREWQKLAQGP ELAEDDANLLHKHIEVANG</p>                                                                                                                                                                                                                                                                                                                                                                                                                                                                                                                                                                                                                                                                                                                                                                                                                                                                                                                                                                              |
| <p><b>&gt;WAVE1 (1-230)-WCA, or WAVE1 (1-230)-(GGG)<sub>6</sub>-WCA(485-559)</b><br/>GHMPLVKNRNDPRHLCHTALPRGIKNELEC VTNISLANIIRQLSSLSKYAEDIFGELFNEAHSFSFRVNSLQERVDRLSVSVT<br/>QLDPKEEELS QDITMRKAFRSTIQDQQLFDRKTLPIPLQETYDVCEQPPPLNILTPYRDDGKEGLKFYTNPSYFFDLWKE<br/>KMLQDTEDEK RKEKRKQKQKNLDRPHEPEK VPRAPHDRRREWQKLAQGP ELAEDDANLLHKHIEVANGGGSGSGSGS<br/>GGSGSGSGSKRHPSTLPVISDARSVLEAIRKGIQLRKVEEQREQEAKHERIENDVATILSRRIAVEYSDSEDDSEFDEVD<br/>WLE</p>                                                                                                                                                                                                                                                                                                                                                                                                                                                                                                                                                                                                                                                                                                                                                                                                                   |
| <p><b>&gt;WAVE1 (1-230)-Rac1, or WAVE1 (1-230)-(GGG)<sub>6</sub>-Rac1<sup>O61L/P29S</sup> (1-188)</b><br/>GHMPLVKNRNDPRHLCHTALPRGIKNELEC VTNISLANIIRQLSSLSKYAEDIFGELFNEAHSFSFRVNSLQERVDRLSVSVT<br/>QLDPKEEELS QDITMRKAFRSTIQDQQLFDRKTLPIPLQETYDVCEQPPPLNILTPYRDDGKEGLKFYTNPSYFFDLWKE<br/>KMLQDTEDEK RKEKRKQKQKNLDRPHEPEK VPRAPHDRRREWQKLAQGP ELAEDDANLLHKHIEVANGGGSGSGSGS<br/>GGSGSGSGSMQAICVVG DGAVGKTCLLISYTTNAFSGEYIPTVFDNYSANVMVDGKPVNLGLWDTAGLEDYDRLR<br/>PLSYPQTDVFLICFSLVSPASFENVR AKWYPEVRHHCNTPILVGT KLDLDRDDKDTIEKLEKELKTPITYPQGLAMAKEIG<br/>AVKYLECSALTQRGLKTVFDEAIRAVLCPPPVKRRKRK</p>                                                                                                                                                                                                                                                                                                                                                                                                                                                                                                                                                                                                                                                                       |
| <p><b>&gt;Abi2 (1-158)</b><br/>GHMAELQMLLEEEIPGRRALFDSYTNLERVADY CENNYIQSADKQRALEETKAYTTQSLASVAYLINTLANNVLQMLD<br/>IQASQLRRMESSINHSIQTVDIHKEKVARREIGLTTNKNTSRTHKIAPANLERPVRYIRKPIDYTILDDIGHGVKVVSTQ</p>                                                                                                                                                                                                                                                                                                                                                                                                                                                                                                                                                                                                                                                                                                                                                                                                                                                                                                                                                                                                                                                                 |
| <p><b>&gt;HSPC300</b><br/>GHMGAAMAGQEDPVQREIHQD WANREYIEITSSIKKIADFLNSFDMSCRSRLATLNEKLTALERRIEYIEARVTKGETLT</p>                                                                                                                                                                                                                                                                                                                                                                                                                                                                                                                                                                                                                                                                                                                                                                                                                                                                                                                                                                                                                                                                                                                                                         |
| <p><b>&gt;WCA</b><br/>KRHPSTLPVISDARSVLEAIRKGIQLRKVEEQREQEAKHERIENDVATILSRRIAVEYSDSEDDSEFDEVDWLE</p>                                                                                                                                                                                                                                                                                                                                                                                                                                                                                                                                                                                                                                                                                                                                                                                                                                                                                                                                                                                                                                                                                                                                                                    |
| <p><b>&gt;GST-Arf1</b><br/>MSPILGYWKIKGLVQPTRLLEYLEEKYEEHL YERDEGDKWRNKKFELGLEFPNLPYYIDGDV KLTQSM AIIRYIADKHN<br/>MLGGCPKERA EISMLEGAVLDIRYGVSR IAYSKDFETLKVDFLSKLP EMLKMFEDRLCHKTYLNGDHVTHPDFMLYDAL<br/>DVVLYMDP MCLDAFPKLVCFKKRIEAIPIQIDKYLKSSKYIAWPLQGWQATFGGGDHPPKSDLVPRGSMRILMVGLDAAG<br/>KTTILYKLLGEIVTTIPTIGFN VETVEYKNISFTVWDVGGQDKIRPLWRHYFQNTQGLIFV VDSNDRERVNEAREELMRM<br/>LAEDEL RDAVLLVFANKQDLPNAMNAEITDKLGLHSLRHRN WYIQATCATSGDGLYEGLDWLSNQLRNQK</p>                                                                                                                                                                                                                                                                                                                                                                                                                                                                                                                                                                                                                                                                                                                                                                                                      |
| <p><b>&gt;His8-Arf1</b><br/>HHHHHHHHGGSGGSMRILMVGLDAAGKTTILYKLLGEIVTTIPTIGFN VETVEYKNISFTVWDVGGQDKIRPLWRHYFQ<br/>NTQGLIFV VDSNDRERVNEAREELMRMLAEDEL RDAVLLVFANKQDLPNAMNAEITDKLGLHSLRHRN WYIQATCAT</p>                                                                                                                                                                                                                                                                                                                                                                                                                                                                                                                                                                                                                                                                                                                                                                                                                                                                                                                                                                                                                                                                   |

|                                                                                                                                                                                                                                                                                                                                                                                                                                                                                                                                                                              |
|------------------------------------------------------------------------------------------------------------------------------------------------------------------------------------------------------------------------------------------------------------------------------------------------------------------------------------------------------------------------------------------------------------------------------------------------------------------------------------------------------------------------------------------------------------------------------|
| <p>SGDGLYEGLDWLSNQLRNQK</p> <p>&gt; <b>His6-EspG</b></p> <p>MSYYHHHHHHYDIPTTENLYFQGAMGSKKSWDEMCAEKLKFLVLSFGLWNPTYSRSERQSFQELLTVLEPVYPLPNELGRVSAARFSDGSSLRISVTNSELVEAEIRTANNEKITVLLSENEQNRLQLSLPIDRHMPYIQVHRALSEMDLTDTTSMRNLLGFTSKLSTTLIPHNAQTDPLSGPTPFSSIFMDTCRGLGNAKLSLNGVDIPANAQKLLRDALGLKTDHSSPTRNVIDHGISRHD AEQIARESSGSDKQKAEVVEFLCHPEAAATACSAFYQSFNVPALTLTHERISKASEYNAERSLDTPNACINISISQSSDGNIVTSHTGVLIMAPEDRPNEMGMLTNRSTSYEVQGVKCIIDEMVSALQPRYAASETYLQNT</p>                                                                                                            |
| <p>&gt; <b>GST-Arf5</b></p> <p>MSPILGYWKIKGLVQPTRLLEYLEEKYEEHLYERDEGDKWRNKKFELGLEFPNLPYYIDGDVKLTQSMAIIRYIADKHNMLGGCPKERAEISMLEGAVLDIRYGVSRIAYSKDFETLKVDFLSKLPKPEMLKMFEDRLCHKTYLNGDHVTHPDFMLYDALDVVLYMDPMCLDAFPKLVCFKKRIEAIPQIDKYLKSSKYIAWPLQGWQATFGGGDHPPKSDLVPRGSMRILMLGLDAAGKTTILYKLLKLGQSVTTIPTVGFNVETVYKNIKFTVWDVGGQDKIRPLWRHYFQNTQGLIFVVDNSDRERVQESADELQKMLQEDELRLDAVLLVFANKQDMPNAMPVSELTDKLGQLRSLRSTWYVQATCATQGTGLYDGLDWLSHELKSR</p>                                                                                                                                   |
| <p>&gt; <b>GST-Arf6</b></p> <p>MSPILGYWKIKGLVQPTRLLEYLEEKYEEHLYERDEGDKWRNKKFELGLEFPNLPYYIDGDVKLTQSMAIIRYIADKHNMLGGCPKERAEISMLEGAVLDIRYGVSRIAYSKDFETLKVDFLSKLPKPEMLKMFEDRLCHKTYLNGDHVTHPDFMLYDALDVVLYMDPMCLDAFPKLVCFKKRIEAIPQIDKYLKSSKYIAWPLQGWQATFGGGDHPPKSDLVPRGSMRILMLGLDAAGKTTILYKLLKLGQSVTTIPTVGFNVETVYKNIKFTVWDVGGQDKIRPLWRHYFQNTQGLIFVVDNSDRERVQESADELQKMLQEDELRLDAVLLVFANKQDMPNAMPVSELTDKLGQLRSLRSTWYVQATCATQGTGLYDGLDWLSHELKSR</p>                                                                                                                                   |
| <p>&gt; <b>GST-Arl1</b></p> <p>MSPILGYWKIKGLVQPTRLLEYLEEKYEEHLYERDEGDKWRNKKFELGLEFPNLPYYIDGDVKLTQSMAIIRYIADKHNMLGGCPKERAEISMLEGAVLDIRYGVSRIAYSKDFETLKVDFLSKLPKPEMLKMFEDRLCHKTYLNGDHVTHPDFMLYDALDVVLYMDPMCLDAFPKLVCFKKRIEAIPQIDKYLKSSKYIAWPLQGWQATFGGGDHPPKSDLVPRGSMRILMLGLDAGAKTTILYRLQVGEVVTIPTVGFNVETVYKNIKFTVWDVGGQDKIRPLWRHYFQNTQGLIFVVDNSDRERVQESADELQKMLQEDELRLDAVLLVFANKQDMPNAMPVSELTDKLGQLRSLRSTWYVQATCATQGTGLYDGLDWLSHELKSR</p>                                                                                                                                     |
| <p>&gt; <b>GST-Arl2</b></p> <p>MSPILGYWKIKGLVQPTRLLEYLEEKYEEHLYERDEGDKWRNKKFELGLEFPNLPYYIDGDVKLTQSMAIIRYIADKHNMLGGCPKERAEISMLEGAVLDIRYGVSRIAYSKDFETLKVDFLSKLPKPEMLKMFEDRLCHKTYLNGDHVTHPDFMLYDALDVVLYMDPMCLDAFPKLVCFKKRIEAIPQIDKYLKSSKYIAWPLQGWQATFGGGDHPPKSDLVPRGSERELRLMLGLDNAGKTTILKKNFNGEDIDTISPTLGFNIKLEHRGFKLNIWDVGGQKSLRSYWRNYFESTDGLIWWVDSADRQRMQDCQRELQSLLEVERLAGATLLIFANKQDLPALSSNAIREALELDSIRSHHWCIQCSAVTGENLLPGIDWLLDDISSRIFTAD</p>                                                                                                                               |
| <p>&gt;<b>GST-Rac1<sup>OP</sup></b> or <b>GST-Tev-Rac1<sup>Q61L/P29S</sup> (1-188)</b></p> <p>MSPILGYWKIKGLVQPTRLLEYLEEKYEEHLYERDEGDKWRNKKFELGLEFPNLPYYIDGDVKLTQSMAIIRYIADKHNMLGGCPKERAEISMLEGAVLDIRYGVSRIAYSKDFETLKVDFLSKLPKPEMLKMFEDRLCHKTYLNGDHVTHPDFMLYDALDVVLYMDPMCLDAFPKLVCFKKRIEAIPQIDKYLKSSKYIAWPLQGWQATFGGGDHPPKSDLVPRGSENLYFQGHMQAICVAVVGDGAVGKTCLLISYTTNAFSGEYIPTVFDNYSANVMVDGKPVNLGLWDTAGLEDYDRLRPLSYPTDVFLLICFSLVSPASFENVRKAWPEVRRHCPNTPHILVGTGLDLRDDKDTIEKLEKELTPITYPQGLAMAKEIGAVKYLECSALTQRGLKTVFDEAIRAVLCPPPVKKRKRK</p>                                      |
| <p>&gt;<b>GST-Rac1<sup>dead</sup></b> or <b>GST-Tev-Rac1(1-188)</b>, with Switch I (a.a. 25-39) replaced by <b>(GGS)s</b></p> <p>MSPILGYWKIKGLVQPTRLLEYLEEKYEEHLYERDEGDKWRNKKFELGLEFPNLPYYIDGDVKLTQSMAIIRYIADKHNMLGGCPKERAEISMLEGAVLDIRYGVSRIAYSKDFETLKVDFLSKLPKPEMLKMFEDRLCHKTYLNGDHVTHPDFMLYDALDVVLYMDPMCLDAFPKLVCFKKRIEAIPQIDKYLKSSKYIAWPLQGWQATFGGGDHPPKSDLVPRGSENLYFQGHMQAICVAVVGDGAVGKTCLLISYTTNAFSGGSGSGSGSGSSYSANVMVDGKPVNLGLWDTAGQEDYDRLRPLSYPTDVFLLICFSLVSPASFENVRKAWPEVRRHCPNTPHILVGTGLDLRDDKDTIEKLEKELTPITYPQGLAMAKEIGAVKYLECSALTQRGLKTVFDEAIRAVLCPPPVKKRKRK</p> |
| <p>&gt; <b>Rac1<sup>OP</sup></b> or <b>Rac1<sup>Q61L/P29S</sup> (1-188)</b></p> <p>MQAIKCVVVDGAVGKTCLLISYTTNAFSGEYIPTVFDNYSANVMVDGKPVNLGLWDTAGLEDYDRLRPLSYPTDVFLLICFSLVSPASFENVRKAWPEVRRHCPNTPHILVGTGLDLRDDKDTIEKLEKELTPITYPQGLAMAKEIGAVKYLECSALTQRGLKTVFDEAIRAVLCPPPVKKRKRK</p>                                                                                                                                                                                                                                                                                             |

842

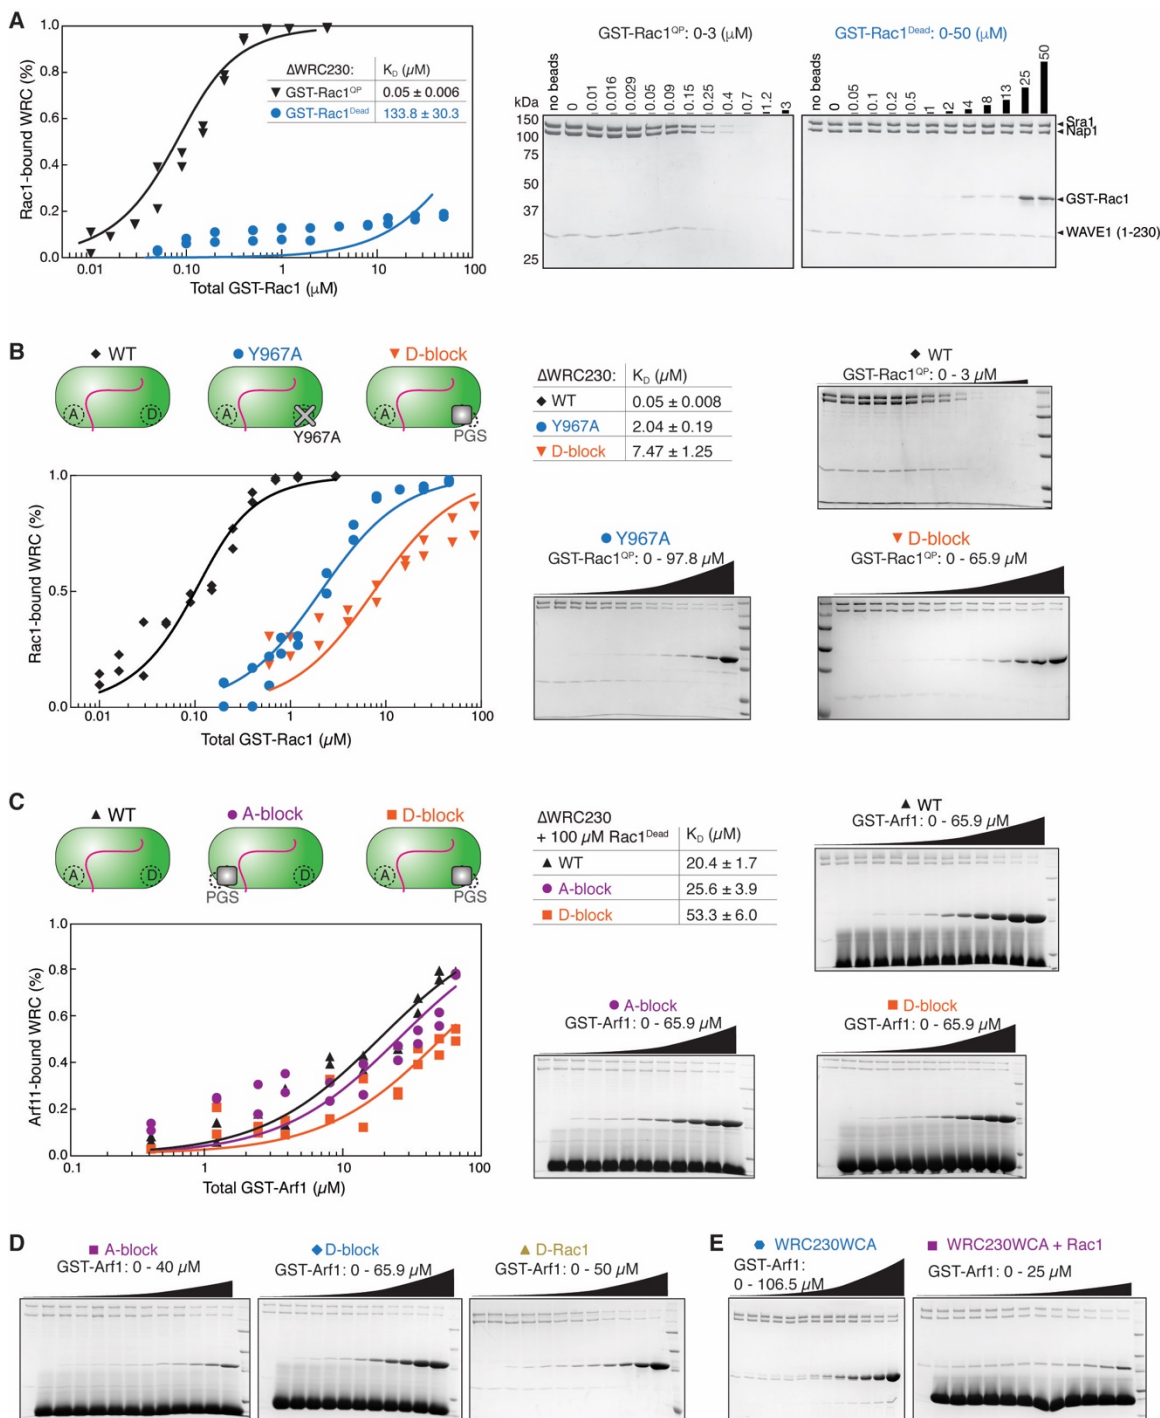

843

844 **Figure S1. Supporting EDP data for Figures 1, 2, and 3 (Related to Figures 1, 2, and**

845 **3). (A) EPD measurement, including quantification and representative Coomassie blue-**

846 **stained SDS PAGE gels, showing GST-Rac1<sup>Dead</sup> does bind to WRC. (B) EPD measurement**

847 **showing that, compared to the Y967A mutation, D-block further reduces potential leaky**

848 binding of Rac1 to the D site. **(C)** EPD measurement showing that blocking the A site or

849 the D site does not significantly affect the basal level binding of Arf1 to WRC. **(D-E)**

850 Example EPD gels for Figures 2B and 3B, respectively.

851

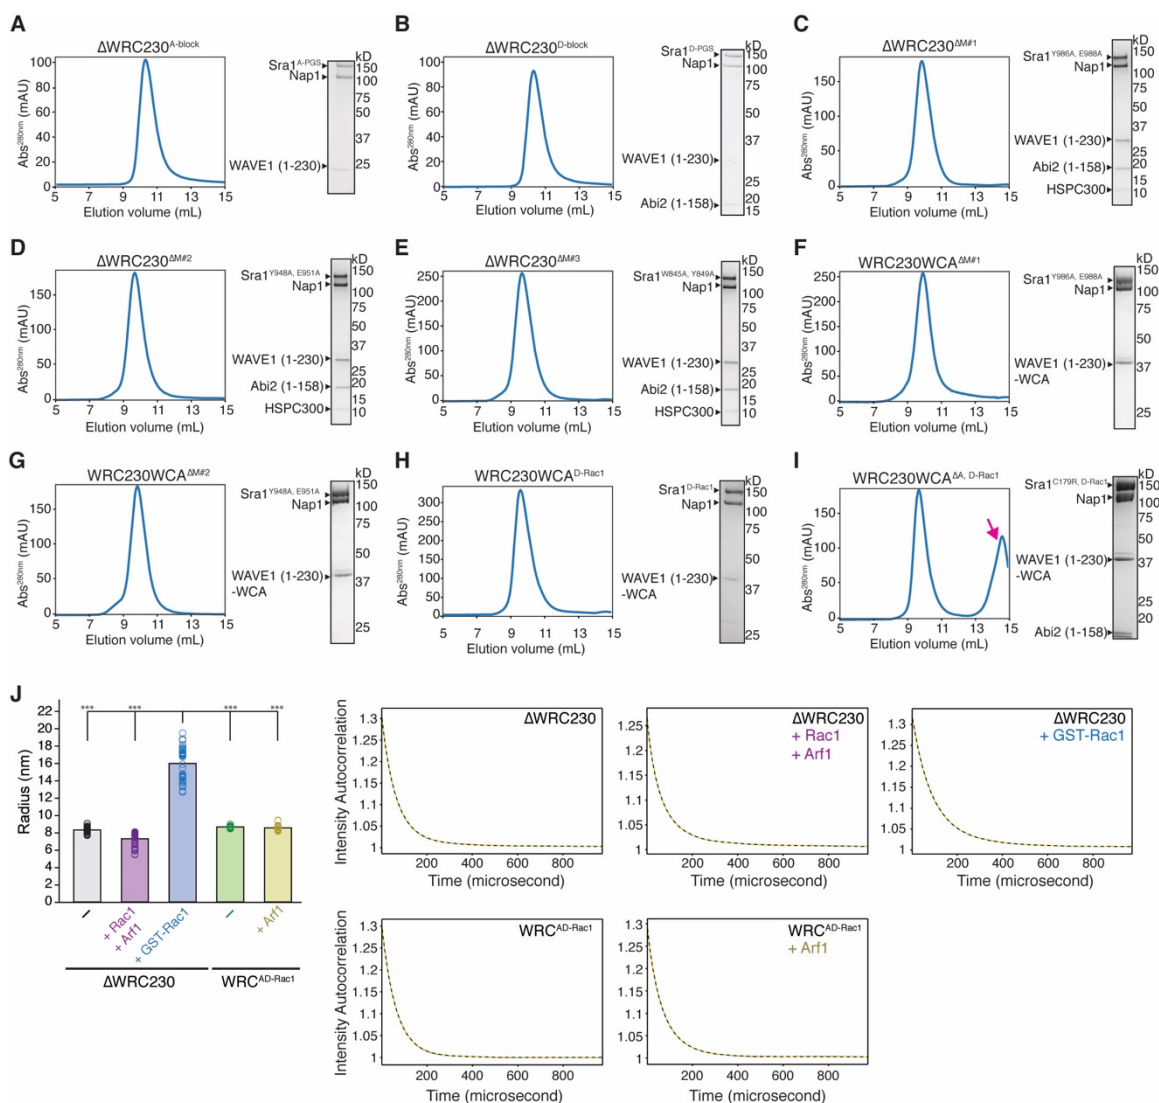

852

853 **Figure S2. Quality control of the WRCs newly developed in this study (Related to**

854 **Figures 1, 2, 3, and 5). (A-I) Shown are the final steps or analytical steps of WRC**

855 **purifications using 24-ml Superdex 200 gel filtration columns, with Coomassie blue-**

856 **stained SDS-PAGE gels showing the peak or pooled fractions. Depending on whether the**

857 **preceding purification step included a Source Q15 ion exchange column, different amounts**

858 **of Tev and cleaved MBP tag may show as clearly separated peaks (indicated by magenta**

859 **arrow) following the WRC peak. (J) Dynamic Light Scattering (DLS) measurements of**

860 **indicated WRC mixed with GTPases. GST-Rac1 is used as a positive control to show**



861 radius change when WRC is dimerized by GST-Rac1. On the left is radius values for 3.3  
862  $\mu\text{M}$   $\Delta\text{WRC230}$  alone ( $n = 54$ ),  $3.5 \mu\text{M}$   $\Delta\text{WRC230} + 30 \mu\text{M}$  Rac1<sup>QP</sup> +  $125 \mu\text{M}$  Arf1 ( $n =$   
863  $44$ ),  $1 \mu\text{M}$   $\Delta\text{WRC230} + 30 \mu\text{M}$  GST-Rac1<sup>QP</sup> ( $n = 51$ ),  $5 \mu\text{M}$  WRC<sup>AD-Rac1</sup> alone ( $n = 16$ ),  
864 and  $5 \mu\text{M}$  WRC<sup>AD-Rac1</sup> +  $125 \mu\text{M}$  Rac1<sup>QP</sup> ( $n = 24$ ).  $n$  equals total number of acquisitions,  
865 \*\*\* indicates  $p < 0.001$ , ANOVA test. Radius values are reported as the average values  
866 from all requisitions. All experiments were collected in 50-100 mM NaCl and 5% (w/v)  
867 glycerol and at room temperature. The slightly reduced radius for  $\Delta\text{WRC230} + \text{Rac1} +$   
868 Arf1 sample was likely due to the addition of large amounts of Rac1 and Arf1, which have  
869 lower molecular weight. On the right is a representative plot of intensity autocorrelation  
870 (black solid curve) and the regularization fit (yellow dashed curve) for each experiment.  
871

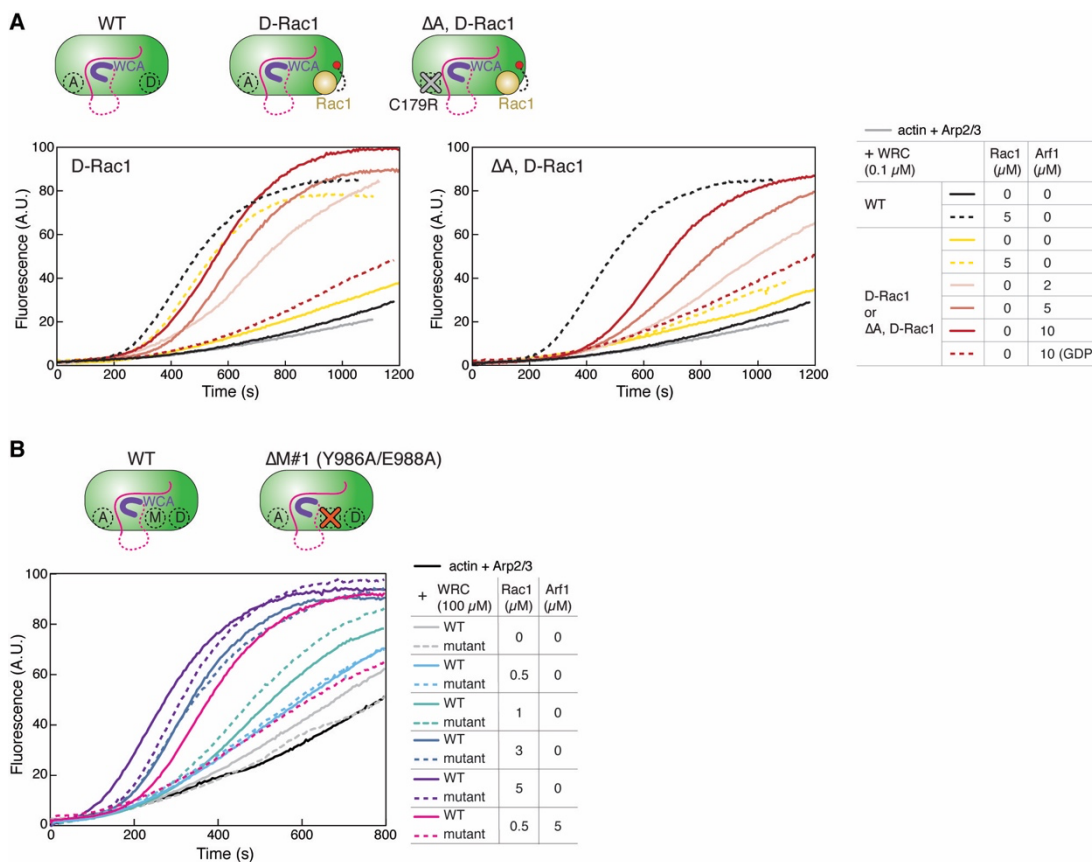

872

873 **Figure S3. Additional actin polymerization assays comparing Arf1- vs. Rac1-**

874 **mediated WRC activation (Related to Figures 3 and 5). (A-B) Pyrene-actin**

875 **polymerization assays comparing indicated WRC variants in response to the addition of**

876 **free Rac1<sup>QP</sup> or Arf1. WT WRC230WCA was used as a reference point. Reactions**

877 **contained 3.5 μM actin (5% pyrene labeled), 10 nM Arp2/3 complex, 100 nM indicated**

878 **WRC, and indicated amounts of Rac1<sup>QP</sup> and/or Arf1. In all assays, Arf1 is loaded with**

879 **GNPPNP, unless it is designated with GDP.**

880

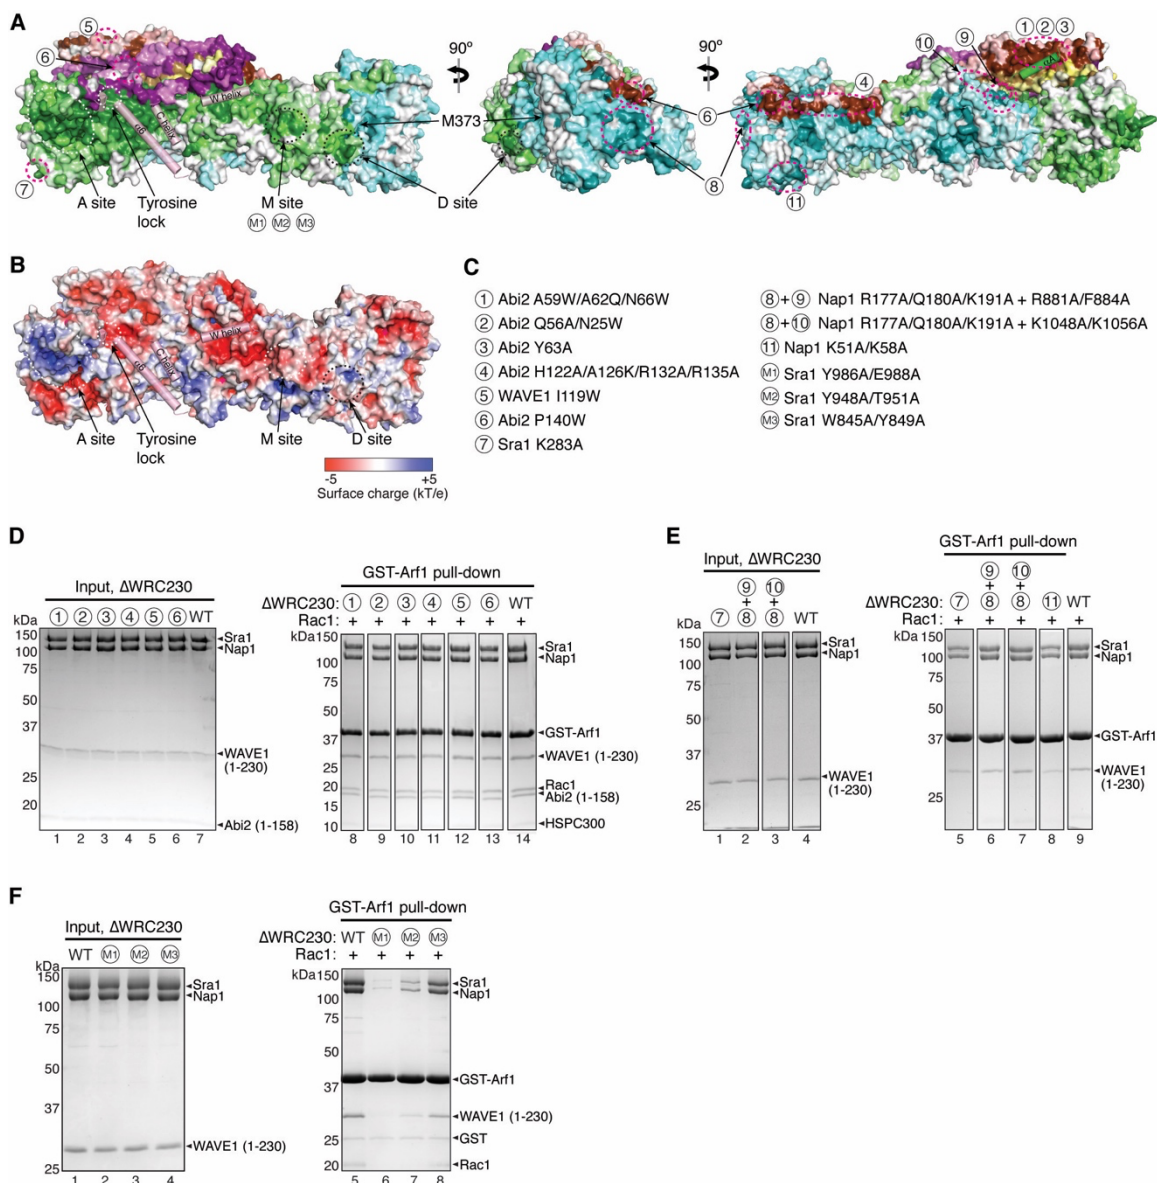

881

882 **Figure S4. Surveying various conserved surfaces on WRC to identify the Arf1-**  
 883 **binding site (Related to Figures 4 and 5). (A-B) Surface conservation (A) and**  
 884 **electrostatic charge (B) representation of the WRC. (A) was calculated by ConSurf**  
 885 **(Ashkenazy et al., 2016), and (B) by APBS in Pymol (Jurrus et al., 2018). In (A), color to**  
 886 **white gradients represent the most conserved surface residues (ConSurf score = 9 for**  
 887 **darkest colors) to the least conserved residues (ConSurf score = 1 for white color).**  
 888 **Important sites on Sra1, including the identified Arf1 binding site (M site), are indicated**

889 with white or black dotted circles. Positions of mutations examined in (D-F) are indicated  
890 with magenta dotted circles. Semitransparent pink cylinders refer to the sequences in  
891 WAVE1 that are destabilized upon WRC activation by Rac1. The  $\alpha$ A helix in Sra1 is also  
892 shown as a semitransparent green cylinder for clarity. **(C)** Information of the mutations  
893 indicated in (A) and examined in (D-F). **(D-F)** Coomassie blue-stained SDS PAGE gels  
894 showing GST-Arf1 pull-down of  $\Delta$ WRC230 carrying indicated surface mutations.

895

896

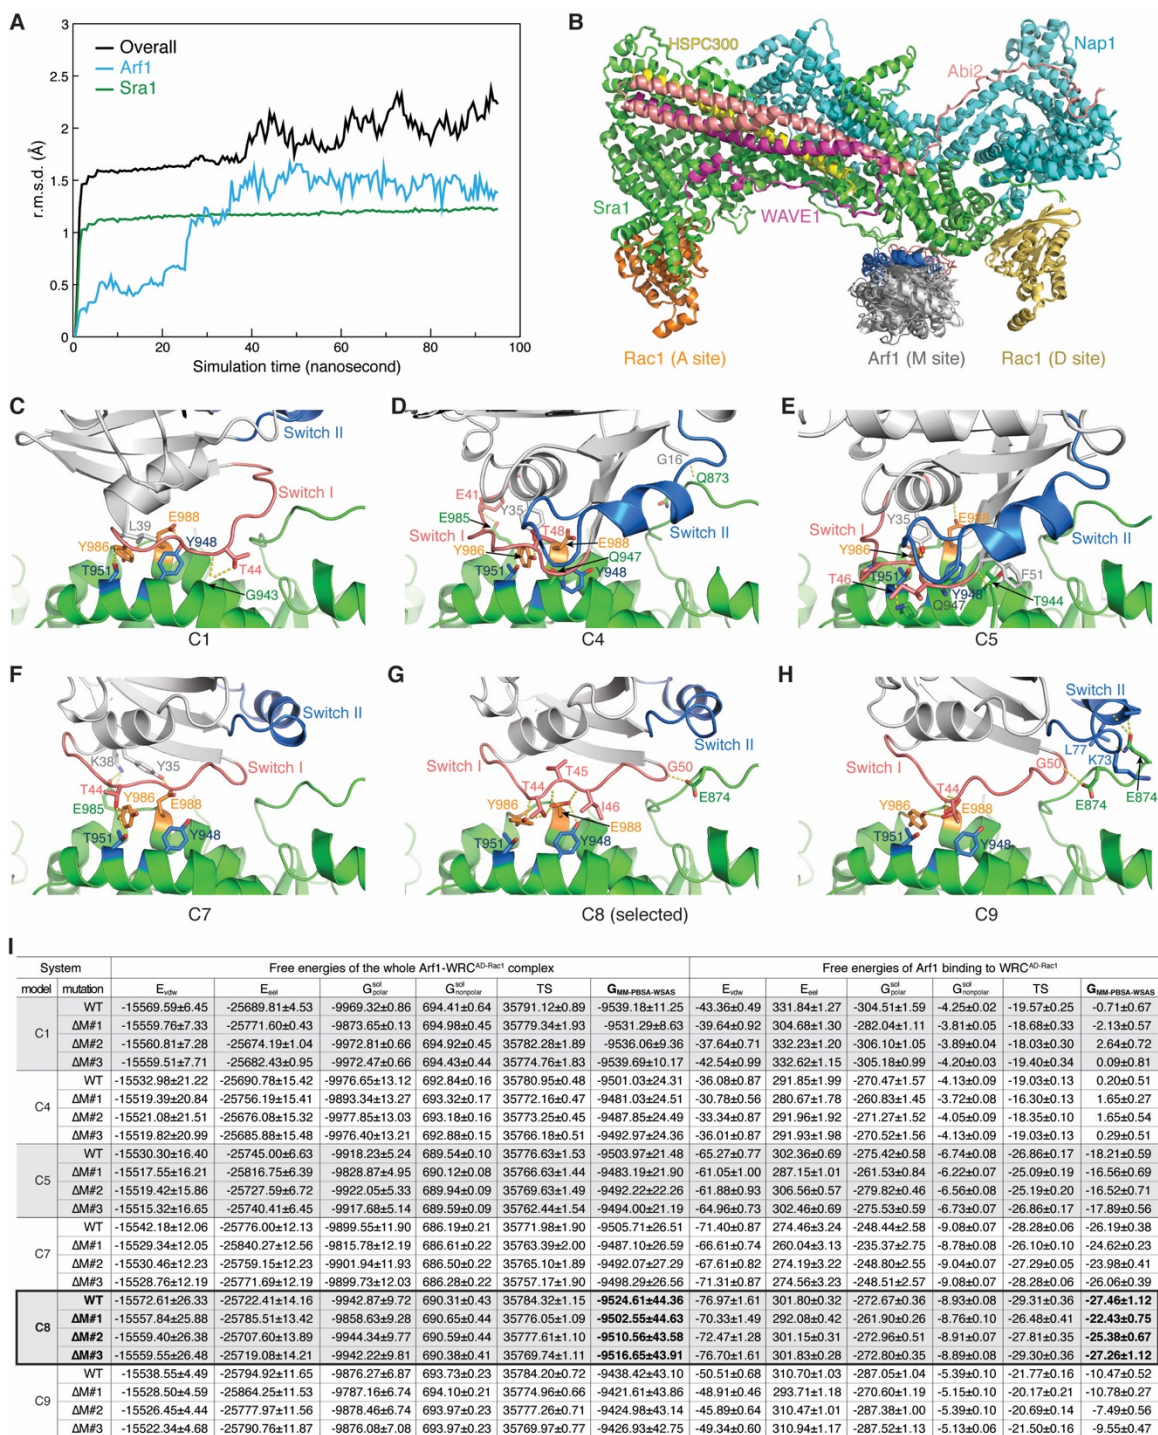

897

898 **Figure S5. Molecular dynamics simulation and energy minimization of the top M-**

899 **site Arf1 docking models (Related to Figure 4). (A)** Root-mean-square deviation

900 (r.m.s.d.) time course of the MD simulation of the C8 model, showing the system reached

901 equilibrium after 30 nanoseconds. Other models showed similar r.m.s.d. time courses. **(B)**

902 Overlay of all six MD energy minimized models. **(C-H)** Detailed view of the Arf1-M site  
903 interactions in indicated models. Sra1 is kept in the same orientation to demonstrate  
904 different orientations of Arf1 in various MD models. Yellow dotted lines indicate polar or  
905  $\pi$ - $\pi$  interactions. **(I)** List of MM-PBSA-WSAS energy terms of whole complex free  
906 energies (left) and Arf1-binding free energies (right) of six Arf1-WRC<sup>AD-Rac1</sup> complexes,  
907 each including the WT WRC and M-site mutants, with  $\Delta M\#1$  for Sra1<sup>Y986A/E988A</sup>,  $\Delta M\#2$   
908 for Sra1<sup>948A/T951A</sup>, and  $\Delta M\#3$  for Sra1<sup>W845A/Y849A</sup> (as a negative control). All energy terms,  
909 including  $E_{vdw}$  and  $E_{eel}$  for the van der Waals and electrostatic interactions, respectively;  
910  $G_{polar}^{sol}$  and  $G_{nonpolar}^{sol}$  for the polar and nonpolar parts of the solvation free energy,  
911 respectively, and TS for the entropic term, are in kcal/mol. Model C8 agreed best with the  
912 experimental results, in that  $\Delta M\#1$  and  $\Delta M\#2$ , but not  $\Delta M\#3$  mutations, increased by free  
913 energies for Arf1 binding.  
914

915 **References**

- 916 Anitei, M., Stange, C., Parshina, I., Baust, T., Schenck, A., Raposo, G., Kirchhausen, T.,  
917 and Hoflack, B. (2010). Protein complexes containing CYFIP/Sra/PIR121 coordinate  
918 Arf1 and Rac1 signalling during clathrin-AP-1-coated carrier biogenesis at the TGN. *Nat.*  
919 *Cell Biol.* *12*.
- 920 Ashkenazy, H., Abadi, S., Martz, E., Chay, O., Mayrose, I., Pupko, T., and Ben-Tal, N.  
921 (2016). ConSurf 2016: an improved methodology to estimate and visualize evolutionary  
922 conservation in macromolecules. *Nucleic Acids Res.* *44*.
- 923 Balasubramanian, N., Scott, D.W., Castle, J.D., Casanova, J.E., and Schwartz, M.A.  
924 (2007). Arf6 and microtubules in adhesion-dependent trafficking of lipid rafts. *Nat. Cell*  
925 *Biol.* *9*.
- 926 Baust, T., Czupalla, C., Krause, E., Bourel-Bonnet, L., and Hoflack, B. (2006). Proteomic  
927 analysis of adaptor protein 1A coats selectively assembled on liposomes. *Proc. Natl.*  
928 *Acad. Sci. U. S. A.* *103*.
- 929 Boshans, R.L., Szanto, S., van Aelst, L., and D'Souza-Schorey, C. (2000). ADP-  
930 Ribosylation Factor 6 Regulates Actin Cytoskeleton Remodeling in Coordination with  
931 Rac1 and RhoA. *Mol. Cell. Biol.* *20*.
- 932 Case, D.A., Walker, R.C., Cheatham, T.E., Simmerling, C., Roitberg, A., Merz, K.M.,  
933 Luo, R., and Darden, T. (2018). Amber 2018. Univ. California, San Fr. 2018.
- 934 Chen, B., Padrick, S.B., Henry, L., and Rosen, M.K. (2014a). Biochemical reconstitution  
935 of the WAVE regulatory complex. *Methods Enzymol.* *540*, 55–72.
- 936 Chen, B., Brinkmann, K., Chen, Z., Pak, C.W., Liao, Y., Shi, S., Henry, L., Grishin, N.  
937 V., Bogdan, S., and Rosen, M.K. (2014b). The WAVE regulatory complex links diverse

938 receptors to the actin cytoskeleton. *Cell* 156, 195–207.

939 Chen, B., Chou, H.T., Brautigam, C.A., Xing, W., Yang, S., Henry, L., Doolittle, L.K.,  
940 Walz, T., and Rosen, M.K. (2017). Rac1 GTPase activates the WAVE regulatory  
941 complex through two distinct binding sites. *Elife* 6.

942 Chen, E.H., Pryce, B.A., Tzeng, J.A., Gonzalez, G.A., and Olson, E.N. (2003). Control of  
943 myoblast fusion by a guanine nucleotide exchange factor, loner, and its effector ARF6.  
944 *Cell* 114.

945 Chen, X.J., Squarr, A.J., Stephan, R., Chen, B., Higgins, T.E., Barry, D.J., Martin, M.C.,  
946 Rosen, M.K., Bogdan, S., and Way, M. (2014c). Ena/VASP proteins cooperate with the  
947 WAVE complex to regulate the actin cytoskeleton. *Dev. Cell* 30, 569–584.

948 Chen, Z., Borek, D., Padrick, S.B., Gomez, T.S., Metlagel, Z., Ismail, A.M., Umetani, J.,  
949 Billadeau, D.D., Otwinowski, Z., and Rosen, M.K. (2010). Structure and Control of the  
950 Actin Regulatory WAVE Complex. *Nature* 468, 533–538.

951 Cheng, A., Arumugam, T. V., Liu, D., Khatri, R.G., Mustafa, K., Kwak, S., Ling, H.P.,  
952 Gonzales, C., Xin, O., Jo, D.G., et al. (2007). Pancortin-2 interacts with WAVE1 and  
953 Bcl-xL in a mitochondria-associated protein complex that mediates ischemic neuronal  
954 death. *J. Neurosci.* 27.

955 Cook, S.A., Comrie, W.A., Poli, M.C., Similuk, M., Oler, A.J., Faruqi, A.J., Kuhns, D.B.,  
956 Yang, S., Vargas-Hernández, A., Carisey, A.F., et al. (2020). HEM1 deficiency disrupts  
957 mTORC2 and F-actin control in inherited immunodysregulatory disease. *Science* (80- ).  
958 369, 202–207.

959 D’Souza-Schorey, C., and Chavrier, P. (2006). ARF proteins: roles in membrane traffic  
960 and beyond. *Nat Rev Mol Cell Biol* 7, 347–358.



- 961 D'Souza-Schorey, C., Boshans, R.L., McDonough, M., Stahl, P.D., and Van Aelst, L.  
962 (1997). A role for POR1, a Rac1-interacting protein, in ARF6-mediated cytoskeletal  
963 rearrangements. *EMBO J.* *16*.
- 964 Derivery, E., Lombard, B., Loew, D., and Gautreau, A. (2009). The Wave complex is  
965 intrinsically inactive. *Cell Motil. Cytoskelet.* *66*, 777–790.
- 966 Desta, I.T., Porter, K.A., Xia, B., Kozakov, D., and Vajda, S. (2020). Performance and Its  
967 Limits in Rigid Body Protein-Protein Docking. *Structure* *28*.
- 968 Ding, B., Yang, S., Schaks, M., Liu, Y., Brown, A., Rottner, K., Chowdhury, S., and  
969 Chen, B. (2022). Structures reveal a key mechanism of WAVE Regulatory Complex  
970 activation by Rac1 GTPase. *BioRxiv [Preprint]*, May 10. doi:  
971 <https://doi.org/10.1101/2022.05.10.49>.
- 972 Donaldson, J.G., and Jackson, C.L. (2011). ARF family G proteins and their regulators:  
973 Roles in membrane transport, development and disease. *Nat. Rev. Mol. Cell Biol.*
- 974 Dong, N., Zhu, Y., Lu, Q., Hu, L., Zheng, Y., and Shao, F. (2012). Structurally distinct  
975 bacterial TBC-like GAPs link Arf GTPase to Rab1 inactivation to counteract host  
976 defenses. *Cell*.
- 977 Doolittle, L.K., Rosen, M.K., and Padrick, S.B. (2013). Measurement and analysis of in  
978 vitro actin polymerization. *Methods Mol Biol* *1046*, 273–293.
- 979 Eden, S., Rohatgi, R., Podtelejnikov, A. V., Mann, M., and Kirschner, M.W. (2002).  
980 Mechanism of regulation of WAVE1-induced actin nucleation by Rac1 and Nck. *Nature*  
981 *418*, 790–793.
- 982 Etienne-Manneville, S., and Hall, A. (2002). Rho GTPases in cell biology. *Nature* *420*.
- 983 Gautreau, A., Ho, H.Y.H., Li, J., Steen, H., Gygi, S.P., and Kirschner, M.W. (2004).

984 Purification and architecture of the ubiquitous Wave complex. *Proc. Natl. Acad. Sci. U.*  
985 *S. A.* *101*.

986 Gillingham, A.K., and Munro, S. (2007). The small G proteins of the Arf family and their  
987 regulators. *Annu. Rev. Cell Dev. Biol.* *23*.

988 Honda, A., Nogami, M., Yokozeki, T., Yamazaki, M., Nakamura, H., Watanabe, H.,  
989 Kawamoto, K., Nakayama, K., Morris, A.J., Frohman, M.A., et al. (1999).  
990 Phosphatidylinositol 4-phosphate 5-kinase  $\alpha$  is a downstream effector of the small G  
991 protein ARF6 in membrane ruffle formation. *Cell* *99*.

992 Hu, B., Shi, B., Jarzynka, M.J., Yiin, J.J., D'Souza-Schorey, C., and Cheng, S.Y. (2009).  
993 ADP-ribosylation factor 6 regulates glioma cell invasion through the IQ-domain GTPase-  
994 activating protein 1-Rac1-mediated pathway. *Cancer Res.* *69*.

995 Humphreys, D., Liu, T., Davidson, A.C., Hume, P.J., and Koronakis, V. (2012a). The  
996 *Drosophila* Arf1 homologue Arf79F is essential for lamellipodium formation. *J Cell Sci*  
997 *125*, 5630–5635.

998 Humphreys, D., Davidson, A., Hume, P.J., and Koronakis, V. (2012b). *Salmonella*  
999 virulence effector SopE and Host GEF ARNO cooperate to recruit and activate WAVE to  
1000 trigger bacterial invasion. *Cell Host Microbe* *11*, 129–139.

1001 Humphreys, D., Davidson, A.C., Hume, P.J., Makin, L.E., and Koronakis, V. (2013).  
1002 Arf6 coordinates actin assembly through the WAVE complex, a mechanism usurped by  
1003 *Salmonella* to invade host cells. *Proc Natl Acad Sci U S A* *110*, 16880–16885.

1004 Humphreys, D., Singh, V., and Koronakis, V. (2016). Inhibition of WAVE Regulatory  
1005 Complex Activation by a Bacterial Virulence Effector Counteracts Pathogen  
1006 Phagocytosis. *Cell Rep* *17*, 697–707.

- 1007 Hunt, E.L., Rai, H., and Harris, T.J.C. (2022). SCAR/WAVE complex recruitment to a  
1008 supracellular actomyosin cable by myosin activators and a junctional Arf-GEF during  
1009 *Drosophila* dorsal closure. *Mol. Biol. Cell*.
- 1010 Ismail, A.M., Padrick, S.B., Chen, B., Umetani, J., and Rosen, M.K. (2009). The WAVE  
1011 Regulatory Complex is Inhibited. *Nat. Struct. Mol. Biol.* *16*, 561–563.
- 1012 Jurrus, E., Engel, D., Star, K., Monson, K., Brandi, J., Felberg, L.E., Brookes, D.H.,  
1013 Wilson, L., Chen, J., Liles, K., et al. (2018). Improvements to the APBS biomolecular  
1014 solvation software suite. *Protein Sci.* *27*.
- 1015 Kang, R., Tang, D., Yu, Y., Wang, Z., Hu, T., Wang, H., and Cao, L. (2010). WAVE1  
1016 regulates Bcl-2 localization and phosphorylation in leukemia cells. *Leukemia* *24*.
- 1017 Kim, P., Li, H., Wang, J., and Zhao, Z. (2021). Landscape of drug-resistance mutations in  
1018 kinase regulatory hotspots. *Brief. Bioinform.* *22*.
- 1019 Koo, T.H., Eipper, B.A., and Donaldson, J.G. (2007). Arf6 recruits the Rac GEF Kalirin  
1020 to the plasma membrane facilitating Rac activation. *BMC Cell Biol.* *8*.
- 1021 Koronakis, V., Hume, P.J., Humphreys, D., Liu, T., Hørning, O., Jensen, O.N., and  
1022 McGhie, E.J. (2011). WAVE regulatory complex activation by cooperating GTPases Arf  
1023 and Rac1. *Proc. Natl. Acad. Sci. U. S. A.* *108*, 14449–14454.
- 1024 Krauss, M., Kinuta, M., Wenk, M.R., De Camilli, P., Takei, K., and Haucke, V. (2003).  
1025 ARF6 stimulates clathrin/AP-2 recruitment to synaptic membranes by activating  
1026 phosphatidylinositol phosphate kinase type I $\gamma$ . *J. Cell Biol.* *162*.
- 1027 Lebensohn, A.M., and Kirschner, M.W. (2009). Activation of the WAVE complex by  
1028 coincident signals controls actin assembly. *Mol. Cell* *36*, 512.
- 1029 Lewis-Saravalli, S., Campbell, S., and Claing, A. (2013). ARF1 controls Rac1 signaling

1030 to regulate migration of MDA-MB-231 invasive breast cancer cells. *Cell Signal* 25,  
1031 1813–1819.

1032 Li, L., Li, C., Sarkar, S., Zhang, J., Witham, S., Zhang, Z., Wang, L., Smith, N., Petukh,  
1033 M., and Alexov, E. (2012). DelPhi: a comprehensive suite for DelPhi software and  
1034 associated resources. *BMC Biophys.* 5.

1035 Maier, J.A., Martinez, C., Kasavajhala, K., Wickstrom, L., Hauser, K.E., and  
1036 Simmerling, C. (2015). ff14SB: Improving the Accuracy of Protein Side Chain and  
1037 Backbone Parameters from ff99SB. *J. Chem. Theory Comput.* 11.

1038 Marchesin, V., Montagnac, G., and Chavrier, P. (2015). ARF6 promotes the formation of  
1039 Rac1 and WAVE-dependent ventral F-actin rosettes in breast cancer cells in response to  
1040 epidermal growth factor. *PLoS One* 10, e0121747.

1041 Mosaddeghzadeh, N., and Ahmadian, M.R. (2021). The rho family gtpases: Mechanisms  
1042 of regulation and signaling. *Cells* 10.

1043 Myers, K.R., and Casanova, J.E. (2008). Regulation of actin cytoskeleton dynamics by  
1044 Arf-family GTPases. *Trends Cell Biol.* 18.

1045 Padrick, S.B., Cheng, H.C., Ismail, A.M., Panchal, S.C., Doolittle, L.K., Kim, S., Skehan,  
1046 B.M., Umetani, J., Brautigam, C.A., Leong, J.M., et al. (2008). Hierarchical Regulation  
1047 of WASP/WAVE Proteins. *Mol. Cell* 32, 426–438.

1048 Palacios, F., Schweitzer, J.K., Boshans, R.L., and D’Souza-Schorey, C. (2002). ARF6-  
1049 GTP recruits Nm23-H1 to facilitate dynamin-mediated endocytosis during adherens  
1050 junctions disassembly. *Nat. Cell Biol.* 4.

1051 Phuyal, S., and Farhan, H. (2019). Multifaceted Rho GTPase Signaling at the  
1052 Endomembranes. *Front. Cell Dev. Biol.* 7.

- 1053 Pollard, T.D. (2010). A guide to simple and informative binding assays. *Mol Biol Cell*  
1054 *21*, 4061–4067.
- 1055 Quignot, C., Rey, J., Yu, J., Tufféry, P., Guerois, R., and Andreani, J. (2018).  
1056 InterEvDock2: An expanded server for protein docking using evolutionary and biological  
1057 information from homology models and multimeric inputs. *Nucleic Acids Res.* *46*.  
1058 Radhakrishna, H., Al-Awar, O., Khachikian, Z., and Donaldson, J.G. (1999). ARF6  
1059 requirement for Rac ruffling suggests a role for membrane trafficking in cortical actin  
1060 rearrangements. *J. Cell Sci.* *112*.
- 1061 Ramírez-Aportela, E., López-Blanco, J.R., and Chacón, P. (2016). FRODOCK 2.0: Fast  
1062 protein-protein docking server. *Bioinformatics* *32*.
- 1063 Ren, X., Farías, G.G., Canagarajah, B.J., Bonifacino, J.S., and Hurley, J.H. (2013).  
1064 Structural basis for recruitment and activation of the AP-1 clathrin adaptor complex by  
1065 Arf1. *Cell* *152*.
- 1066 Rocchia, W., Alexov, E., and Honig, B. (2001). Extending the applicability of the  
1067 nonlinear Poisson-Boltzmann equation: Multiple dielectric constants and multivalent  
1068 ions. *J. Phys. Chem. B* *105*.
- 1069 Rottner, K., Stradal, T.E.B., and Chen, B. (2021). WAVE regulatory complex. *Curr. Biol.*  
1070 *31*, R512–R517.
- 1071 Santy, L.C., and Casanova, J.E. (2001). Activation of ARF6 by ARNO stimulates  
1072 epithelial cell migration through downstream activation of both Rac1 and phospholipase  
1073 D. *J. Cell Biol.* *154*.
- 1074 Santy, L.C., Ravichandran, K.S., and Casanova, J.E. (2005). The DOCK180/Elmo  
1075 complex couples ARNO-mediated Arf6 activation to the downstream activation of Rac1.

- 1076 Curr. Biol. *15*.
- 1077 Schaks, M., Singh, S.P., Kage, F., Thomason, P., Klünemann, T., Steffen, A.,  
1078 Blankenfeldt, W., Stradal, T.E., Insall, R.H., and Rottner, K. (2018). Distinct Interaction  
1079 Sites of Rac GTPase with WAVE Regulatory Complex Have Non-redundant Functions  
1080 in Vivo. Curr. Biol. *28*.
- 1081 Schaks, M., Reinke, M., Witke, W., and Rottner, K. (2020). Molecular Dissection of  
1082 Neurodevelopmental Disorder-Causing Mutations in CYFIP2. Cells *9*.
- 1083 Schneider, C.A., Rasband, W.S., and Eliceiri, K.W. (2012). NIH Image to ImageJ: 25  
1084 years of image analysis. Nat. Methods *9*.
- 1085 Singh, V., Davidson, A.C., Hume, P.J., Humphreys, D., and Koronakis, V. (2017). Arf  
1086 GTPase interplay with Rho GTPases in regulation of the actin cytoskeleton. Small  
1087 GTPases *0*.
- 1088 Singh, V., Davidson, A.C., Hume, P.J., Humphreys, D., and Koronakis, V. (2019). Arf  
1089 GTPase interplay with Rho GTPases in regulation of the actin cytoskeleton. Small  
1090 GTPases *10*, 411–418.
- 1091 Singh, V., Davidson, A.C., Hume, P.J., and Koronakis, V. (2020). Arf6 can trigger wave  
1092 regulatory complex-dependent actin assembly independent of arno. Int. J. Mol. Sci. *21*.
- 1093 Steffen, A., Rottner, K., Ehinger, J., Innocenti, M., Scita, G., Wehland, J., and Stradal,  
1094 T.E.B. (2004). Sra-1 and Nap1 link Rac to actin assembly driving lamellipodia formation.  
1095 EMBO J. *23*.
- 1096 Su, L., Wang, Y., Wang, J., Mifune, Y., Morin, M.D., Jones, B.T., Moresco, E.M.Y.,  
1097 Boger, D.L., Beutler, B., and Zhang, H. (2019). Structural Basis of TLR2/TLR1  
1098 Activation by the Synthetic Agonist Diprovocim. J. Med. Chem. *62*.

- 1099 Sung, J.Y., Engmann, O., Teylan, M.A., Nairn, A.C., Greengard, P., and Kim, Y. (2008).  
1100 WAVE1 controls neuronal activity-induced mitochondrial distribution in dendritic  
1101 spines. *Proc. Natl. Acad. Sci. U. S. A.* *105*.
- 1102 Sztul, E., Chen, P.W., Casanova, J.E., Cherfils, J., Dacks, J.B., Lambright, D.G., Lee,  
1103 F.J.S., Randazzo, P.A., Santy, L.C., Schürmann, A., et al. (2019). Arf GTPases and their  
1104 GEFs and GAPS: Concepts and challenges. *Mol. Biol. Cell* *30*.
- 1105 Takenawa, T., and Suetsugu, S. (2007). The WASP-WAVE protein network: Connecting  
1106 the membrane to the cytoskeleton. *Nat. Rev. Mol. Cell Biol.* *8*, 37–48.
- 1107 Tarricone, C., Xiao, B., Justin, N., Walker, P.A., Rittinger, K., Gamblin, S.J., and  
1108 Smerdon, S.J. (2001). The structural basis of Arfaptin-mediated cross-talk between Rac  
1109 and Arf signalling pathways. *Nature* *411*.
- 1110 Thompson, J.D., Higgins, D.G., and Gibson, T.J. (1994). CLUSTAL W: Improving the  
1111 sensitivity of progressive multiple sequence alignment through sequence weighting,  
1112 position-specific gap penalties and weight matrix choice. *Nucleic Acids Res.* *22*.
- 1113 Wang, J., and Hou, T. (2012). Develop and test a solvent accessible surface area-based  
1114 model in conformational entropy calculations. *J. Chem. Inf. Model.* *52*.
- 1115 Wang, E., Sun, H., Wang, J., Wang, Z., Liu, H., Zhang, J.Z.H., and Hou, T. (2019). End-  
1116 Point Binding Free Energy Calculation with MM/PBSA and MM/GBSA: Strategies and  
1117 Applications in Drug Design. *Chem. Rev.* *119*.
- 1118 Wang, J., Wolf, R.M., Caldwell, J.W., Kollman, P.A., and Case, D.A. (2004).  
1119 Development and testing of a general Amber force field. *J. Comput. Chem.* *25*.
- 1120 Wang, J., Hou, T., and Xu, X. (2006). Recent Advances in Free Energy Calculations with  
1121 a Combination of Molecular Mechanics and Continuum Models. *Curr. Comput. Aided-*

1122 Drug Des. 2.

1123 Wennerberg, K., Rossman, K.L., and Der, C.J. (2005). The Ras superfamily at a glance.

1124 J. Cell Sci. 118.

1125 Yan, Y., Tao, H., He, J., and Huang, S.Y. (2020). The HDOCK server for integrated

1126 protein–protein docking. Nat. Protoc. 15.

1127 Yin, J., Mobarec, J.C., Kolb, P., and Rosenbaum, D.M. (2015). Crystal structure of the

1128 human OX2 orexin receptor bound to the insomnia drug suvorexant. Nature 519.

1129 Yin, J., Babaoglu, K., Brautigam, C.A., Clark, L., Shao, Z., Scheuermann, T.H., Harrell,

1130 C.M., Gotter, A.L., Roecker, A.J., Winrow, C.J., et al. (2016). Structure and ligand-

1131 binding mechanism of the human OX 1 and OX 2 orexin receptors. Nat. Struct. Mol.

1132 Biol. 23.

1133 Zhang, Y., He, X., Zhai, J., Ji, B., Man, V.H., and Wang, J. (2021). In silico binding

1134 profile characterization of SARS-CoV-2 spike protein and its mutants bound to human

1135 ACE2 receptor. Brief. Bioinform. 22.

1136 Zou, W., Dong, X., Broederdorf, T.R., Shen, A., Kramer, D.A., Shi, R., Liang, X., Miller,

1137 D.M., Xiang, Y.K., Yasuda, R., et al. (2018). A Dendritic Guidance Receptor Complex

1138 Brings Together Distinct Actin Regulators to Drive Efficient F-Actin Assembly and

1139 Branching. Dev. Cell 45, 362-375.e3.

1140 Van Zundert, G.C.P., Rodrigues, J.P.G.L.M., Trellet, M., Schmitz, C., Kastiris, P.L.,

1141 Karaca, E., Melquiond, A.S.J., Van Dijk, M., De Vries, S.J., and Bonvin, A.M.J.J.

1142 (2016). The HADDOCK2.2 Web Server: User-Friendly Integrative Modeling of

1143 Biomolecular Complexes. J. Mol. Biol. 428.

1144
